# Supplementary material for: Positive selection in the genomes of two Papua New Guinean populations at distinct altitude levels
Source: PubMed Central journal article supplement (PMC11061283; doi:10.1038/s41467-024-47735-1), 2024-04-30
Supplement: 41467_2024_47735_MOESM1_ESM.pdf [file 41467_2024_47735_MOESM1_ESM.pdf]

## Positive selection in the genomes of two Papua New Guinean populations at distinct altitude levels

Mathilde André<sup>1,2</sup>, Nicolas Brucato<sup>3</sup>, Georgi Hudjasov<sup>2</sup>, Vasili Pankratov<sup>2</sup>, Danat Yermakovich<sup>2</sup>, Francesco Montinaro<sup>1,4</sup>, Rita Kreevan<sup>2</sup>, Jason Kariwiga<sup>5,6</sup>, John Muke<sup>7</sup>, Anne Boland<sup>8</sup>, Jean-François Deleuze<sup>8</sup>, Vincent Meyer<sup>8</sup>, Nicholas Evans<sup>9</sup>, Murray P. Cox<sup>10,11</sup>, Matthew Leavesley<sup>5,12,13</sup>, Michael Dannemann<sup>2</sup>, Tönis Org<sup>2</sup>, Mait Metspalu<sup>1</sup>, Mayukh Mondal<sup>2,14\*</sup>, François-Xavier Ricaut<sup>3\*</sup>

\*Corresponding authors:

[mondal.mayukh@gmail.com](mailto:mondal.mayukh@gmail.com)

[francois-xavier.ricaut@univ-tlse3.fr](mailto:francois-xavier.ricaut@univ-tlse3.fr)

These authors jointly supervised this work: Mayukh Mondal, François-Xavier Ricaut

### Affiliations:

1. Estonian Biocentre, Institute of Genomics, University of Tartu, Riia 23b, 51010 Tartu, Tartumaa, Estonia
2. Centre for Genomics, Evolution & Medicine, Institute of Genomics, University of Tartu, Riia 23b, 51010 Tartu, Tartumaa, Estonia
3. Centre de Recherche sur la Biodiversité et l'Environnement (CRBE), Université de Toulouse, CNRS, IRD, Toulouse INP, Université Toulouse 3 – Paul Sabatier (UT3), Toulouse, France
4. Department of Biosciences, Biotechnology and the Environment, University of Bari, Bari, Italy
5. Strand of Anthropology, Sociology and Archaeology, School of Humanities and Social Sciences, University of Papua New Guinea, PO Box 320, University 134, National Capital District, Papua New Guinea
6. School of Social Science, University of Queensland, St Lucia, Queensland, Australia
7. Social Research Institute Ltd, Port Moresby, Papua New Guinea
8. Université Paris-Saclay, CEA, Centre National de Recherche en Génomique Humaine (CNRGH), 91057, Evry, France
9. ARC Centre of Excellence for the Dynamics of Language, Coombs Building, Fellows Road, CHL, CAP, Australian National University, Australia
10. School of Natural Sciences, Massey University, Palmerston North, New Zealand
11. Department of Statistics, University of Auckland, Auckland, New Zealand
12. College of Arts, Society and Education, James Cook University, P.O. Box 6811, Cairns, Queensland, 4870, Australia
13. ARC Centre of Excellence for Australian Biodiversity and Heritage, University of Wollongong, Wollongong, New South Wales, 2522, Australia
14. Institute of Clinical Molecular Biology, Christian-Albrechts-Universität zu Kiel 24118 Kiel, Germany

## Table of contents

|                                                                                                      |    |
|------------------------------------------------------------------------------------------------------|----|
| Supplementary Figures.....                                                                           | 3  |
| Supplementary Tables.....                                                                            | 29 |
| Supplementary Notes.....                                                                             |    |
| 1. Sampling and sequencing.....                                                                      | 52 |
| 2. Phenotype data collection.....                                                                    | 53 |
| 3. Variant Calling.....                                                                              | 53 |
| 4. Quality control.....                                                                              | 54 |
| 5. Kinship analysis.....                                                                             | 54 |
| 6. Generation of genomic mask.....                                                                   | 55 |
| 7. LD pruning and Admixture.....                                                                     | 55 |
| 8. Phasing.....                                                                                      | 56 |
| 9. Random sampling approach to test the significance of the top candidate regions for selection..... | 56 |
| 10. Control for the difference in mean coverage.....                                                 | 57 |
| 11. Control for admixture in PNG lowlanders.....                                                     | 57 |
| 12. Relate.....                                                                                      | 58 |
| 13. Clues.....                                                                                       | 59 |
| 14. Association in the UK Biobank.....                                                               | 60 |
| 15. Association test with PNG phenotypes.....                                                        | 60 |
| 16. Introgression.....                                                                               | 61 |
| References: .....                                                                                    | 62 |

# Supplementary Figures

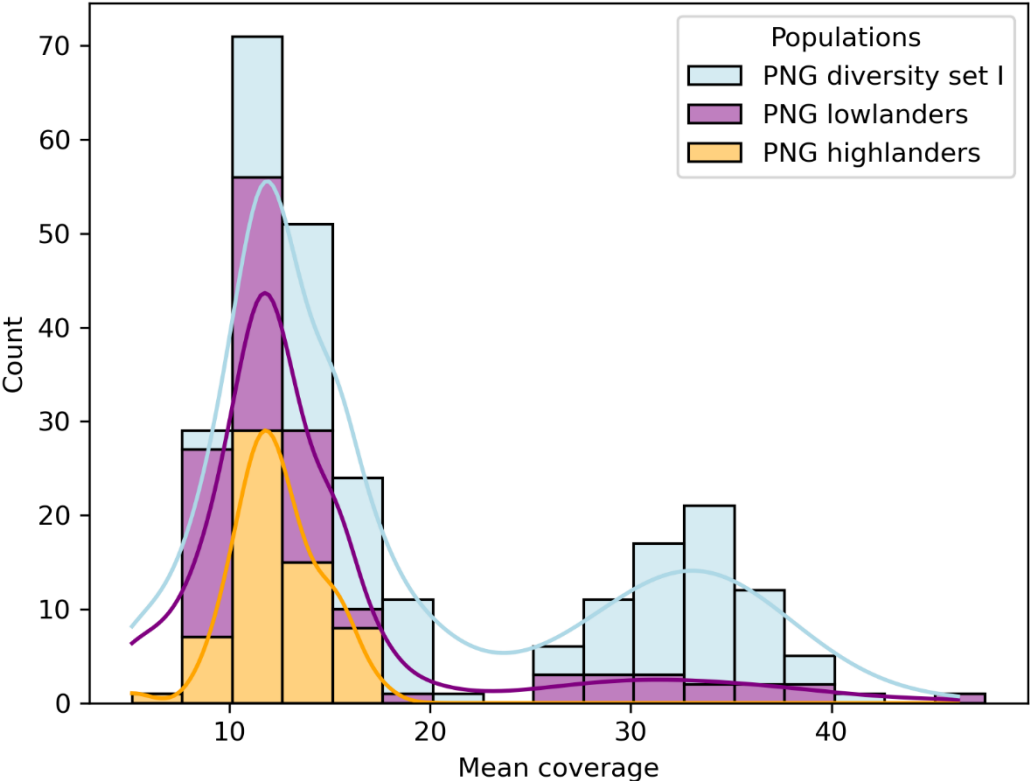

**Figure S1:** Distribution of mean coverage within the autosomes interval in Port Moresby (PNG diversity set I), PNG highlanders (Mt Wilhelm) and PNG lowlanders (Daru) sequences. Figure generated with the ggplot2 package (v3.4.2). Source data are provided as a Source Data file.

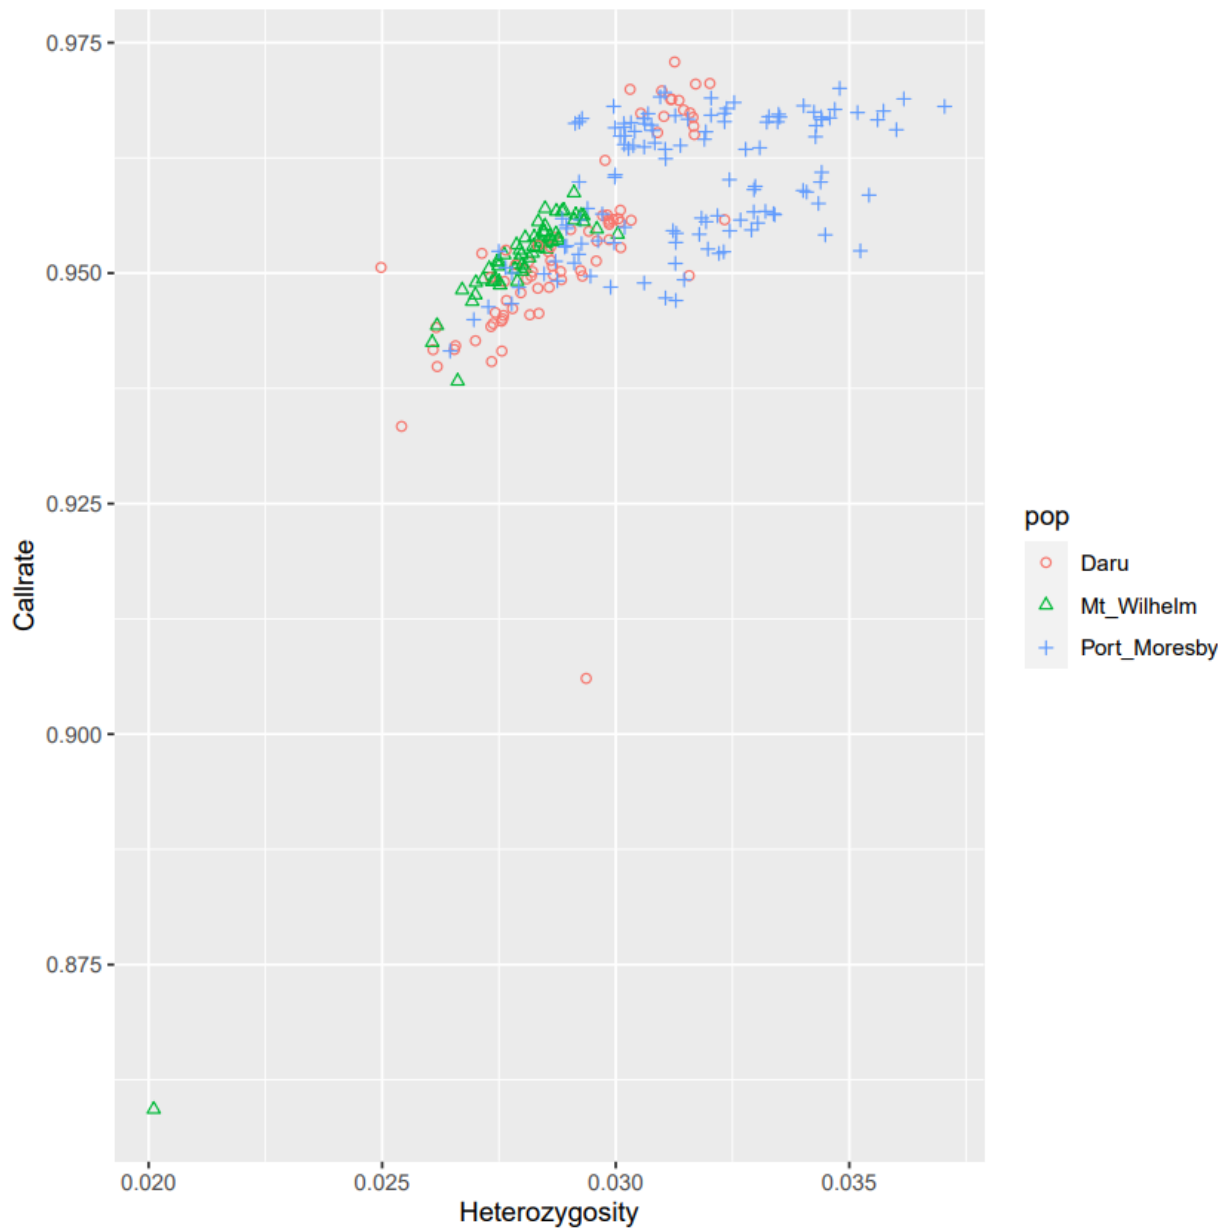

**Figure S2:** Heterozygosity to call rate within autosome interval in PNG diversity set I (Port Moresby), PNG highlanders(Mt Wilhelm), PNG lowlanders (Daru) sequences. Figure generated with the ggplot2 package (v3.4.2). Source data are provided as a Source Data file.

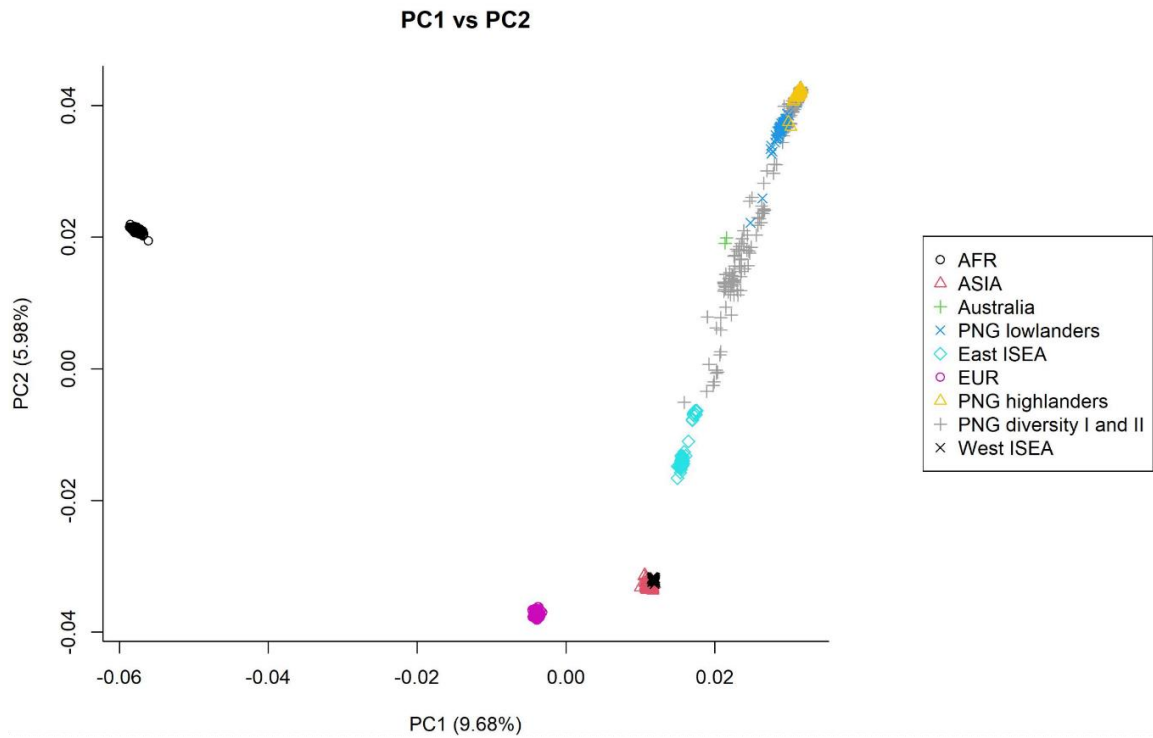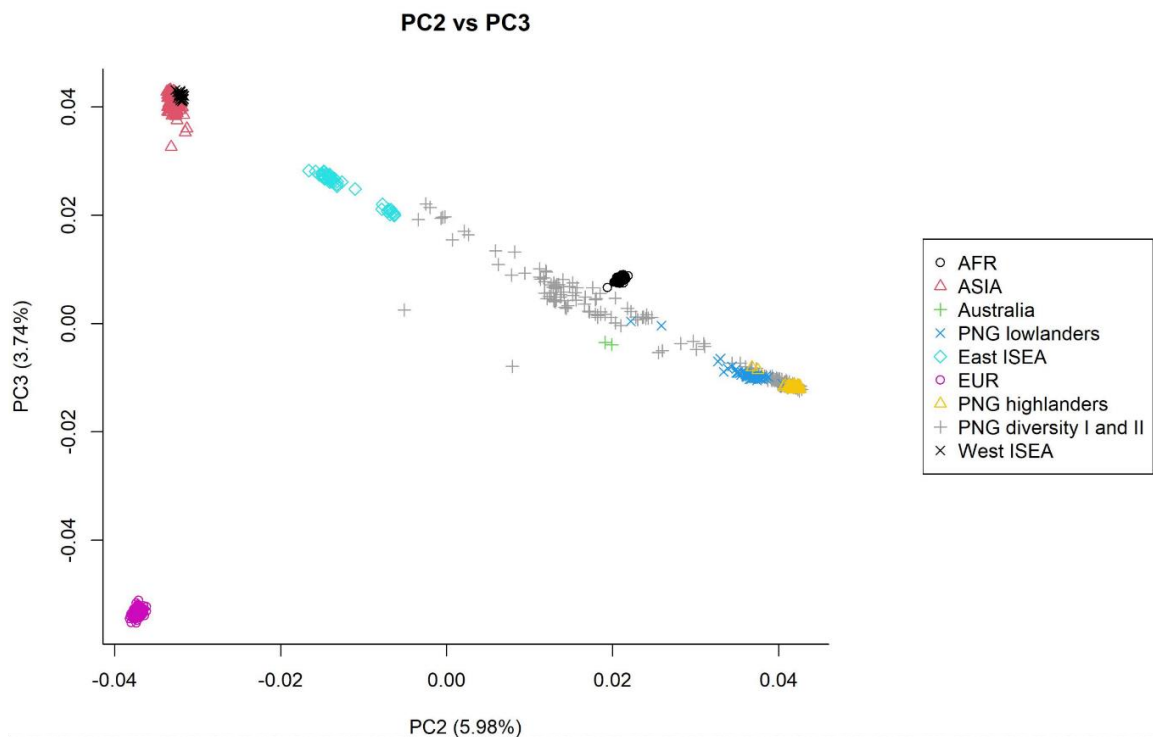

**Figure S3:** PCA plots from PC1 to PC3. AFR=YRI and ESN, ASIA=CHB and KHV, EUR=GBR and CEU, all from the 1000 Genomes Project (Byrska-Bishop et al., 2022), PNG diversity I and II (Brucato et al., 2021, Bergström et al., 2020; Jacobs et al., 2019; Malaspinas et al., 2016; Mallick et al., 2016; Vernot et al., 2016), West and East ISEA from Jacobs et al., 2019 and AUS = Aboriginal Australian genomes from SGDP (Mallick et al. 2016). The figure was generated using R v3.3.0 software and the ggplot2 package (v3.4.2). Source data are provided as a Source Data file.

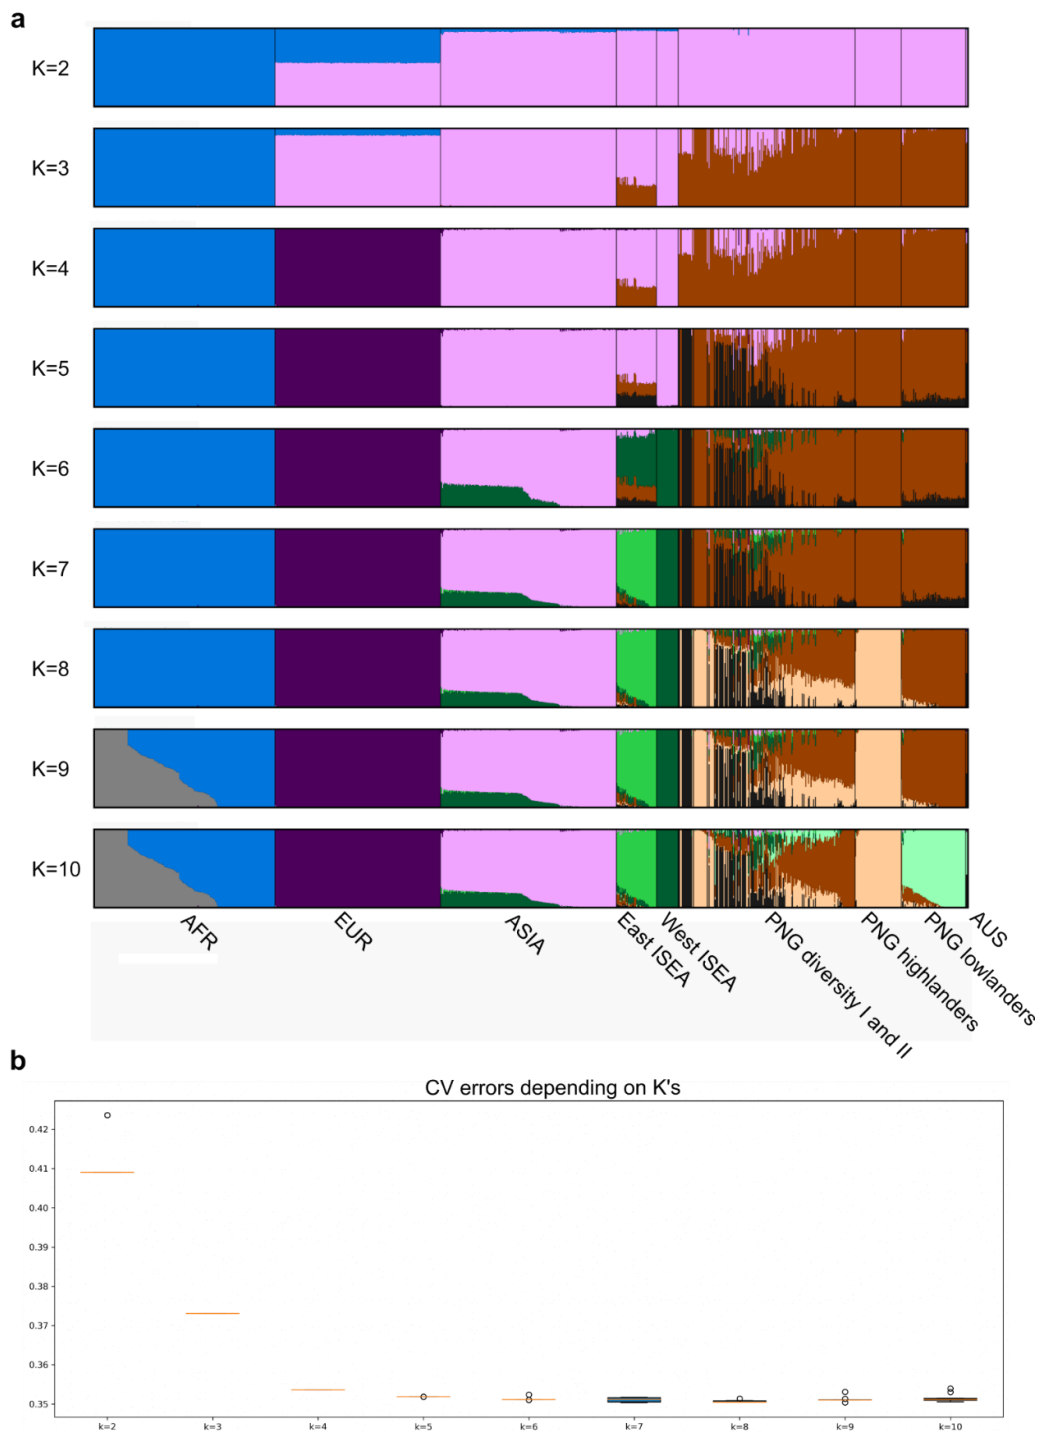

**Figure S4: (a) ADMIXTURE ancestry proportions for K=2 to K=10.** AFR=YRI and ESN, ASIA=CHB and KHV, EUR= GBR and CEU, all from the 1000 Genomes Project (Byrsk-Bishop et al., 2022), PNG diversity I and II (Brucato et al., 2021, Bergström et al., 2020; Jacobs et al., 2019; Malaspinas et al., 2016; Mallick et al., 2016; Vernot et al., 2016), West and East ISEA from Jacobs et al., 2019 and AUS = Aboriginal Australian genomes from SGDP (Mallick et al. 2016). Plots generated with pong (v 1.5) (Behr et al., 2016) **(b). Cross-validation errors for ADMIXTURE.** CV errors were computed for ten independent runs of the ADMIXTURE analysis from K=2 to K=10. CV error is low in all K but 2 and 3, with K=8 showing the lowest CV error (CV error mean [95% CI]:0.351 [0.350 - 0.351]). Source data are provided as a Source Data file.

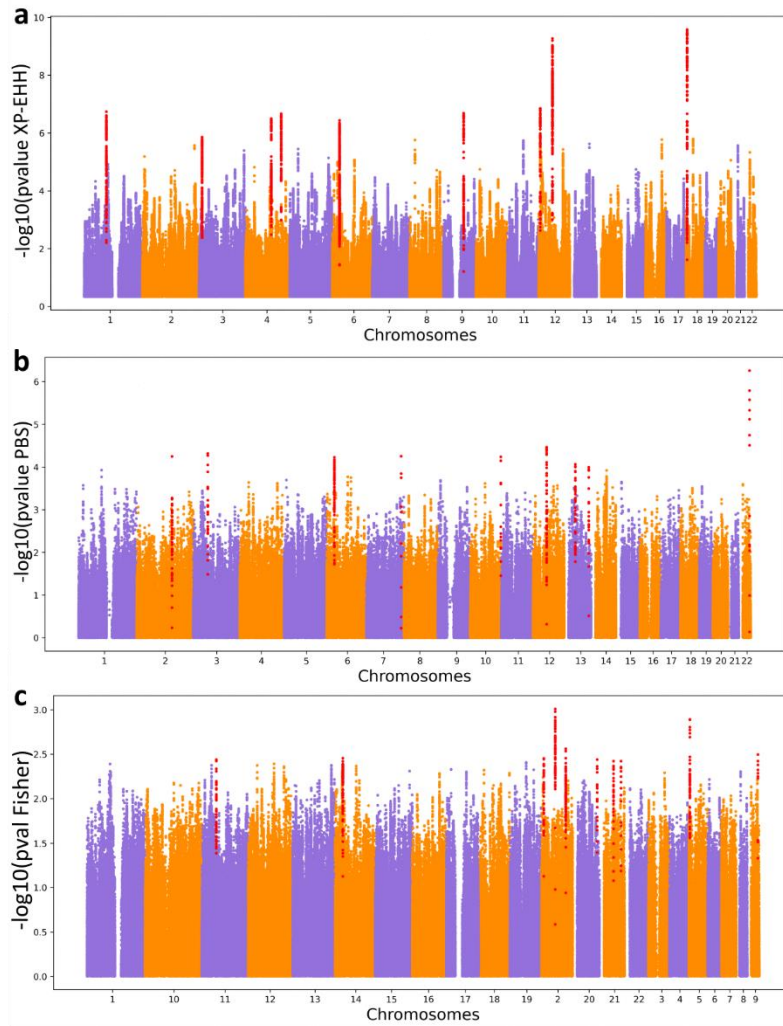

**Fig. S5: Manhattan plots of the p-value for the three selection scans among PNG highlanders computed with a random sampling approach.** The ten genomic regions with the highest score are shown in red. **(a)** P-values for the XP-EHH scores using PNG highlanders as the target population and PNG lowlanders as the reference population. **(b)** P-values for the PBS scores using PNG highlanders as the target population, PNG lowlanders as the reference population, and Yorubas from 1000G as the outgroup. **(c)** P-values for the Fisher Scores combining the PBS and XP-EHH scores of PNG highlanders. Source data are provided as a Source Data file.

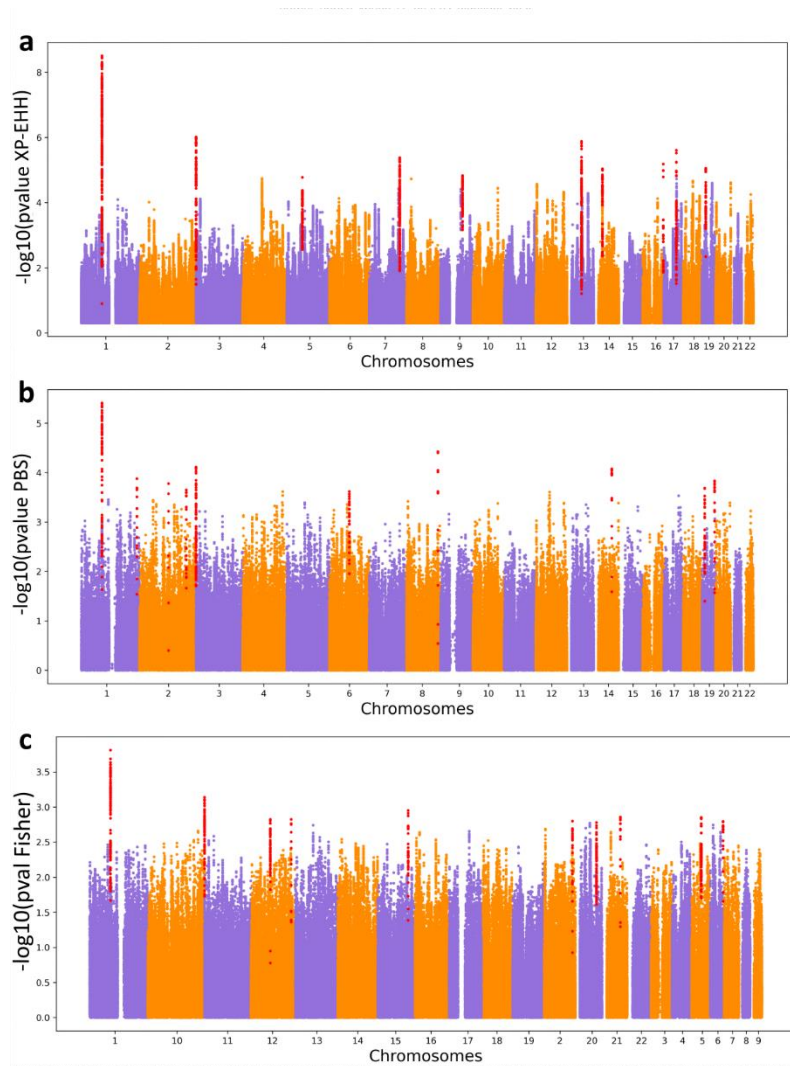

**Fig. S6: Manhattan plots of the p-value for the three selection scans among PNG lowlanders computed by random sampling approach.** The ten genomic regions with the highest score are shown in red. (a) P-values for the XP-EHH scores using PNG lowlanders as the target population and PNG highlanders as the reference population. (b) P-values for the PBS scores using PNG lowlanders as the target population, PNG highlanders as the reference population, and Yorubas from 1000G as the outgroup. (c) P-values for the Fisher Scores combining the PBS and XP-EHH scores of PNG lowlanders. Source data are provided as a Source Data file.



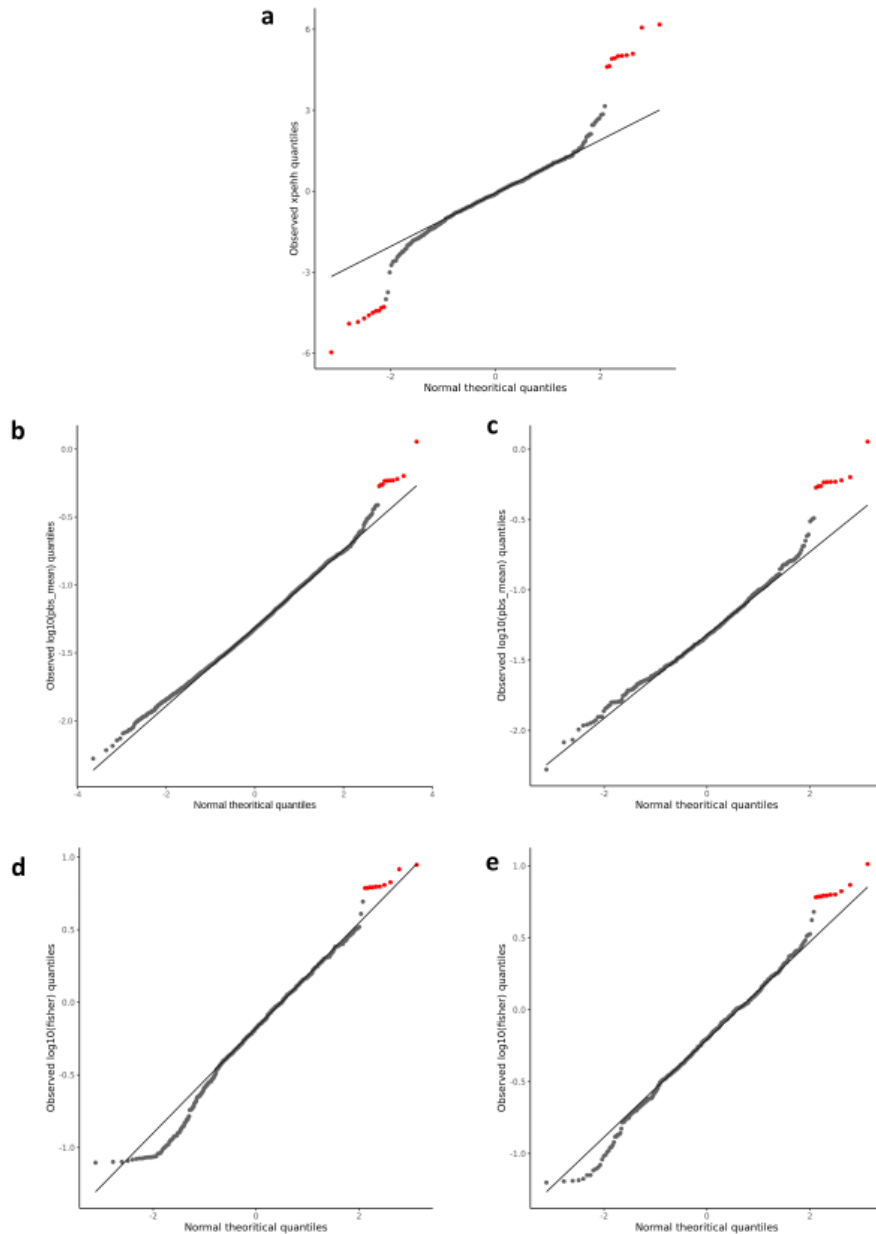

**Figure S7: Quantile-quantile plot for the XP-EHH, PBS and Fisher scores computed for PNG highlanders and lowlanders.** (a) QQ plot showing the observed XP-EHH score of independent random SNPs separated by 5MB (y-axis) as a function of quantiles expected from a normal distribution with the same mean and variance as the empirical distribution(x-axis). SNPs with the highest score within the top 10 XP-EHH regions in PNG highlanders (Table S7) and PNG lowlanders (Table S8) are shown in red. (b,c) QQ plot showing the observed  $\log_{10}(\text{mean PBS score})$  of independent random 20 SNPs long windows separated by 5MB (y-axis) as a function of quantiles expected from a normal distribution with the same mean and variance as the empirical distribution(x-axis). 20 SNPs windows with the highest mean PBS score within the top 10 PBS regions in PNG highlanders (b, Table S7) and PNG lowlanders (c, Table S8) are shown in red. (d,e) QQ plot showing the observed  $\log_{10}(\text{Fisher score})$  of independent random 20 SNPs long windows separated by 5MB (y-axis) as a function of quantiles expected from a normal distribution with the same mean and variance as the empirical distribution(x-axis). 20 SNPs windows with the highest Fisher score within the top 10 Fisher regions in PNG highlanders (d, Table S7) and PNG lowlanders (e, Table S8) are shown in red. Source data are provided as a Source Data file.

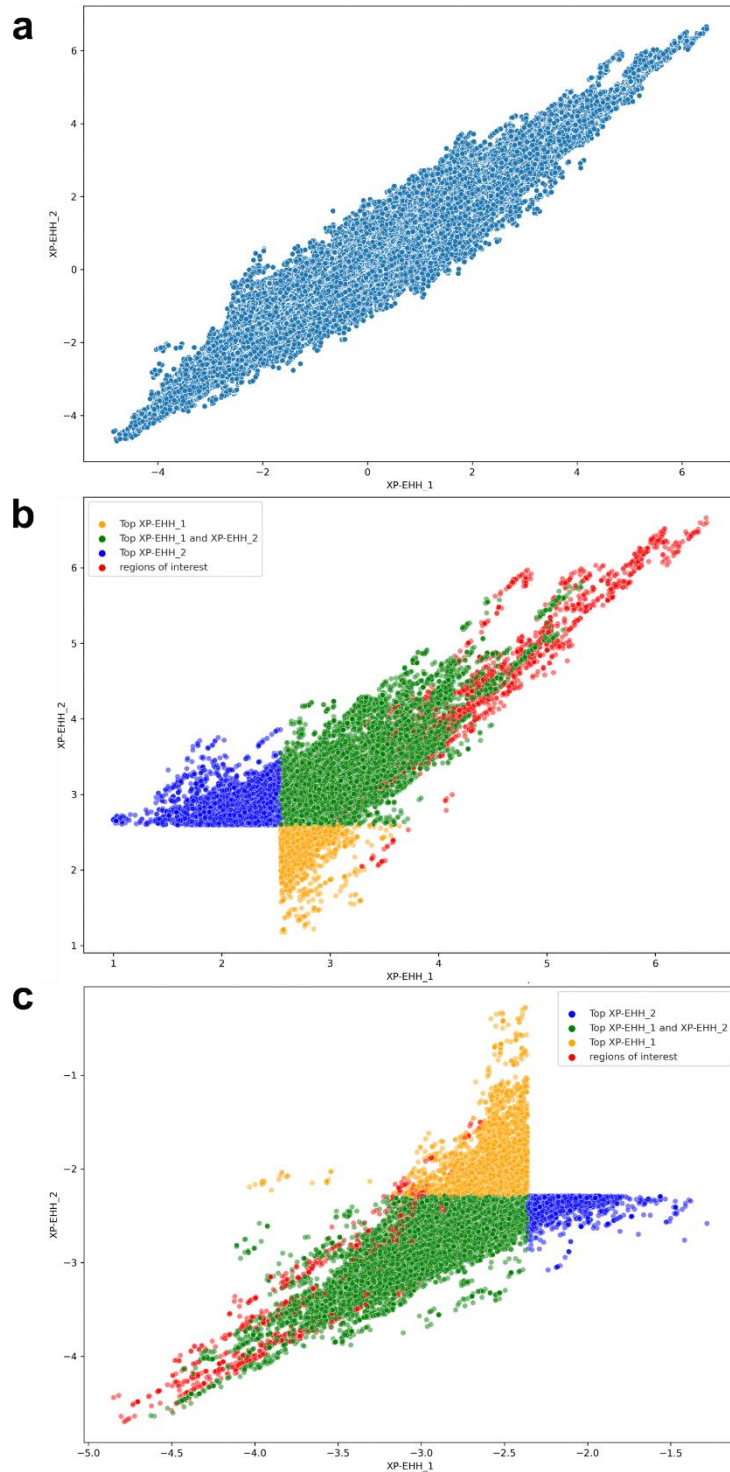

**Figure S8: XP-EHH results with high or reduced coverage PNG lowlanders.** (a) Correlation between variant calling including high coverage PNG lowlanders (XP-EHH\_1) and variant calling with reduced coverage (XP-EHH\_2). Spearman coefficient=0.970. (b) zoom in on the SNPs in the 99<sup>th</sup> percentile (top selected SNPs in PNG highlanders) for XP-EHH\_1, XP-EHH\_2 or both. SNPs included in the top XP-EHH regions in PNG highlanders (Table S7) are coloured in red. (c) zoom in on the SNPs in the 1<sup>st</sup> percentile (top selected SNPs in PNG lowlanders) for XP-EHH\_1, XP-EHH\_2 or both. SNPs included in the top XP-EHH regions in PNG lowlanders (Table S8) are coloured in red. Source data are provided as a Source Data file.

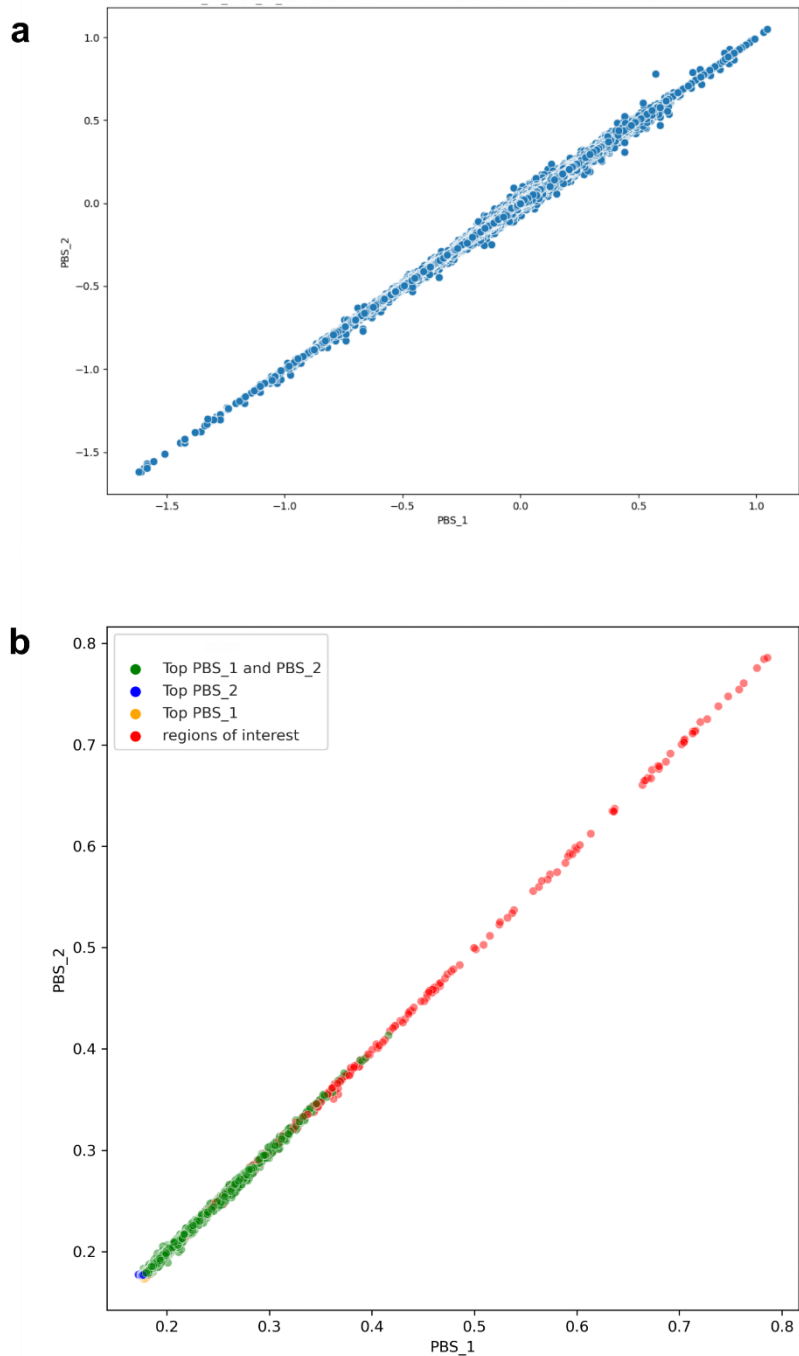

**Figure S9: PBS results with high or low coverage PNG lowlanders as the target population.** PNG highlanders are used as the reference population, and YRI from the 1000 Genomes Project as the outgroup. **(a)** Correlation between variant calling including high coverage PNG lowlanders (PBS\_1) and variant calling with reduced coverage (PBS\_2). Spearman coefficient=0.998. **(b)** zoom in on the SNPs in the 99<sup>th</sup> percentile (top selected SNPs in PNG lowlanders) for PBS\_1, PBS\_2, or both. SNPs included in the top PBS regions in PNG lowlanders (Table S8) are coloured in red. Source data are provided as a Source Data file.

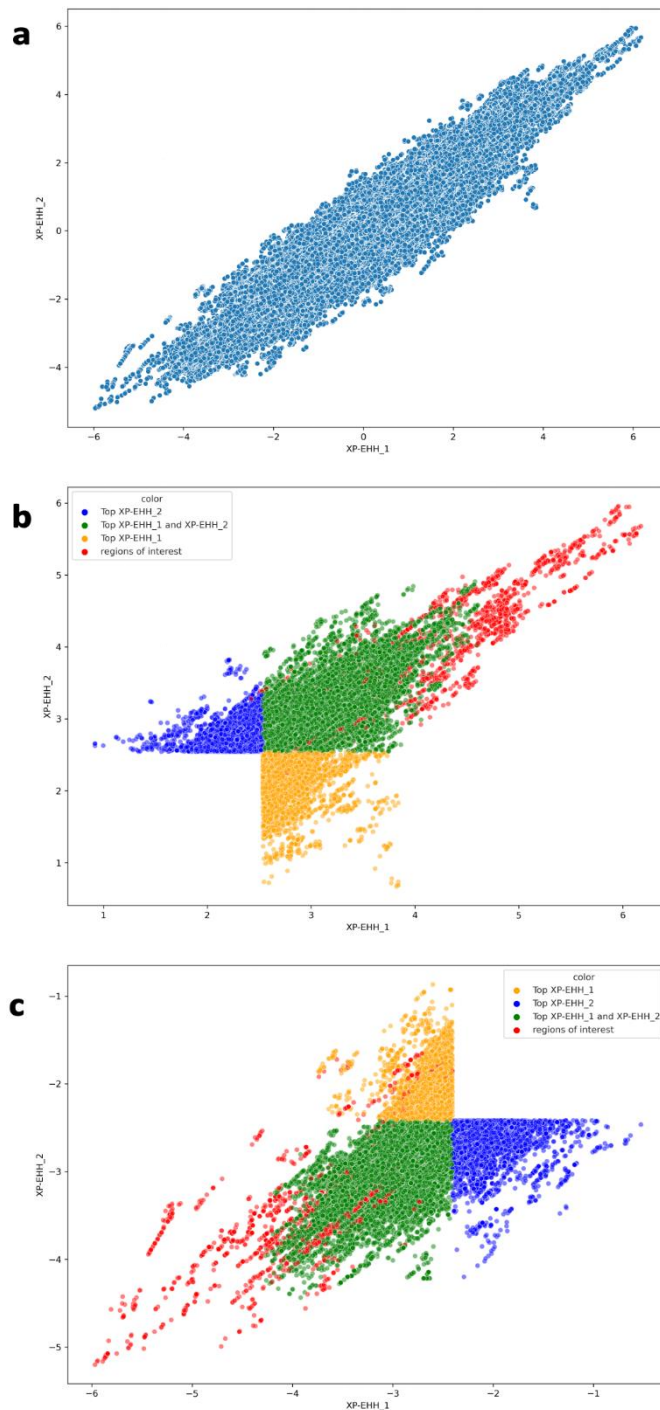

**Figure S10: XP-EHH results with or without admixed PNG lowlanders.** (a) Correlation between XP-EHH score including admixed PNG lowlanders (XP-EHH\_1) and XP-EHH score not including admixed PNG lowlanders (XP-EHH\_2) as the reference population. Spearman coefficient=0.950. (b) zoom in on the SNPs in the 99<sup>th</sup> percentile (top selected SNPs in PNG highlanders) for XP-EHH\_1, XP-EHH\_2 or both. SNPs included in the top XP-EHH regions in PNG highlanders (Table S7) are coloured in red. (c) zoom in on the SNPs in the 1<sup>st</sup> percentile (top selected SNPs in PNG lowlanders) for XP-EHH\_1, XP-EHH\_2 or both. SNPs included in the top XP-EHH regions in PNG lowlanders (Table S8) are coloured in red. Source data are provided as a Source Data file.

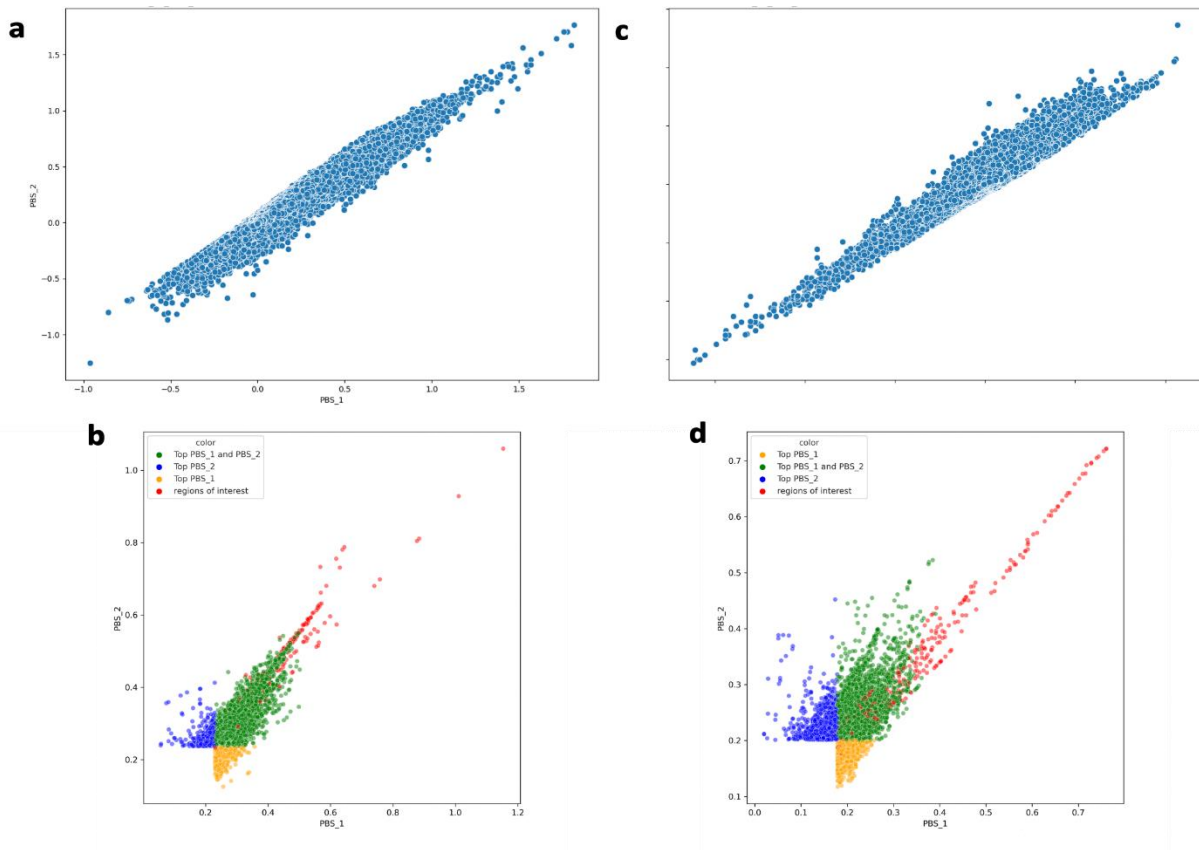

**Figure S11: PBS results with or without admixed PNG lowlanders.** (a) Correlation between PBS results for PNG highlanders with PNG lowlanders including admixed PNG lowlanders as the reference population (PBS\_1), PBS results for PNG highlanders with PNG lowlanders not including admixed PNG lowlanders as the reference population (PBS\_2) and YRI as the outgroup. Spearman coefficient=0.935. (b) zoom in on the SNPs in the 99<sup>th</sup> percentile (top selected SNPs in PNG highlanders) for PBS\_1, PBS\_2, or both. SNPs included in the top PBS regions in PNG highlanders (Table S8) are coloured in red. (c) Correlation between PBS results for PNG lowlanders including admixed PNG lowlanders (PBS\_1) and PBS results for PNG lowlanders not including admixed PNG lowlanders (PBS\_2) with PNG highlanders as the reference population and YRI from 1000 as the outgroup. Spearman coefficient=0.926. (d) zoom in on the SNPs in the 99<sup>th</sup> percentile (top selected SNPs in PNG lowlanders) for PBS\_1, PBS\_2, or both. SNPs included in the top PBS regions in PNG lowlanders (Table S8) are coloured in red. Source data are provided as a Source Data file.

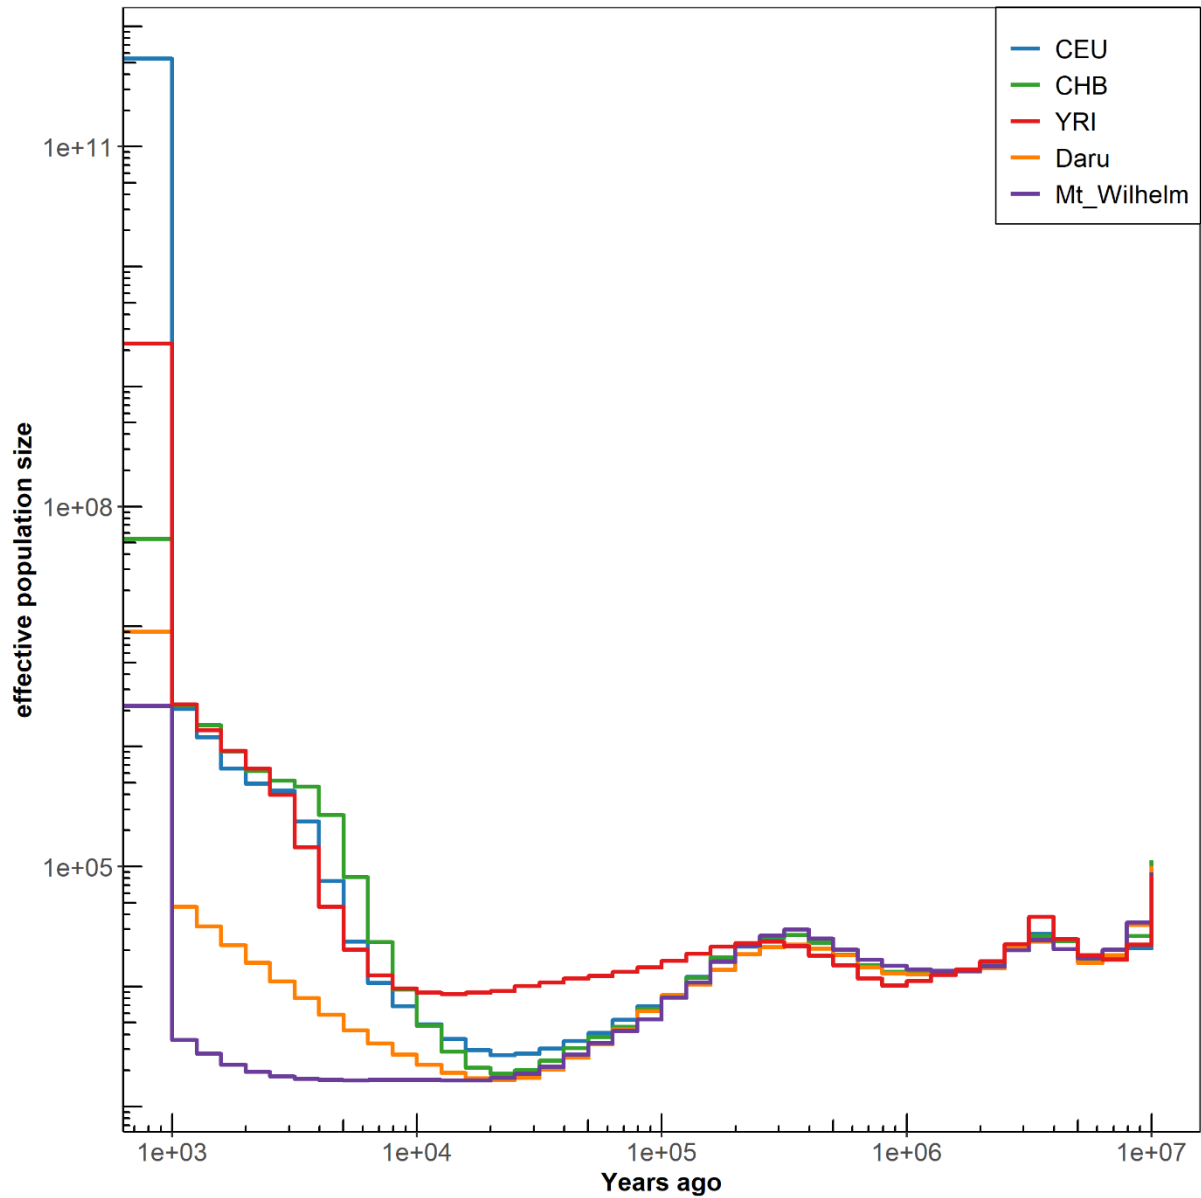

**Figure S12: Relate effective population size curves computed with Relate for CEU, CHB, and YRI from the 1000 Genomes Project, Mt Wilhelm (PNG highlanders) and Daru (PNG lowlanders). Figure generated with the ggplot2 package (v3.4.2). Source data are provided as a Source Data file.**

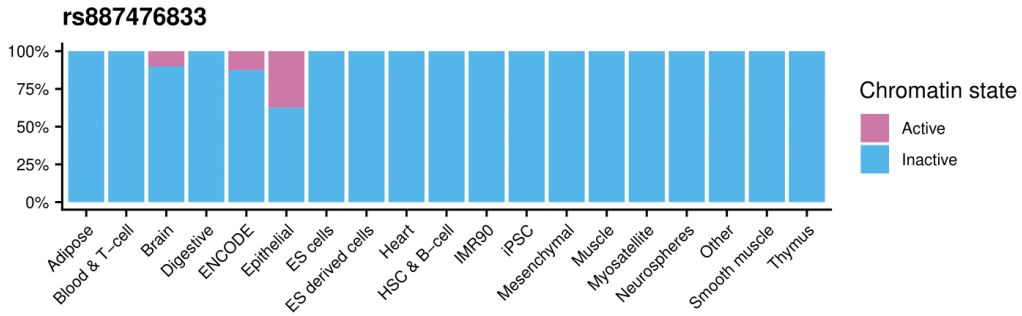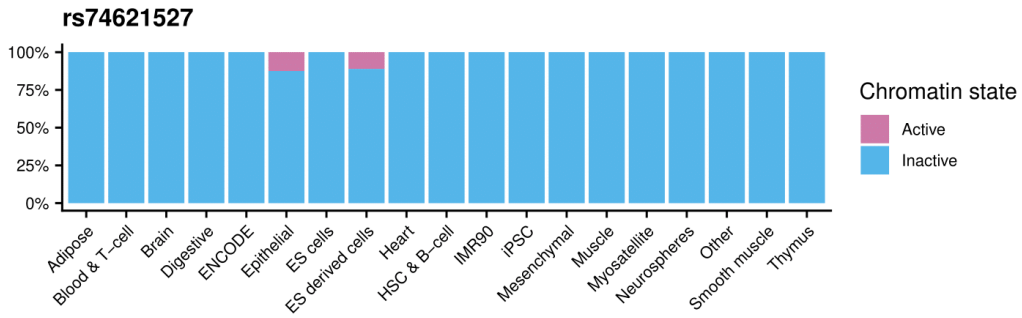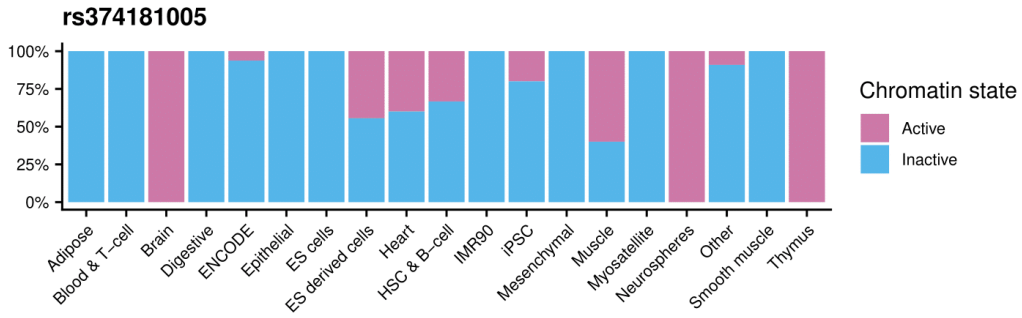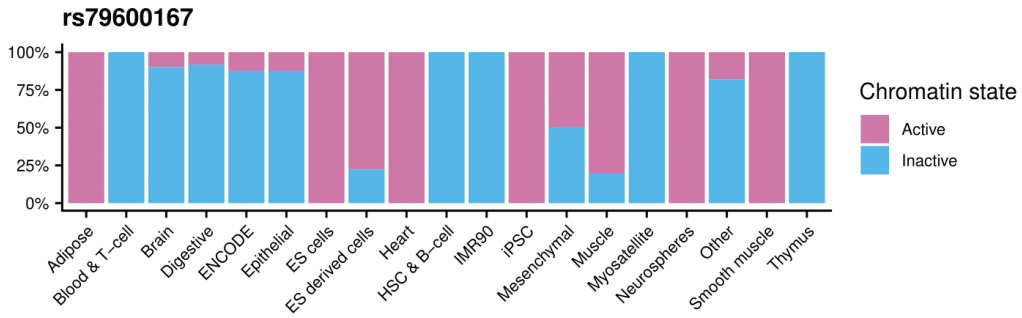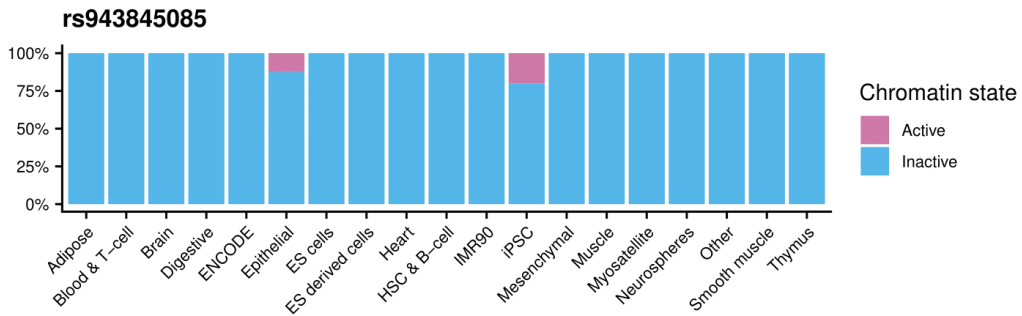

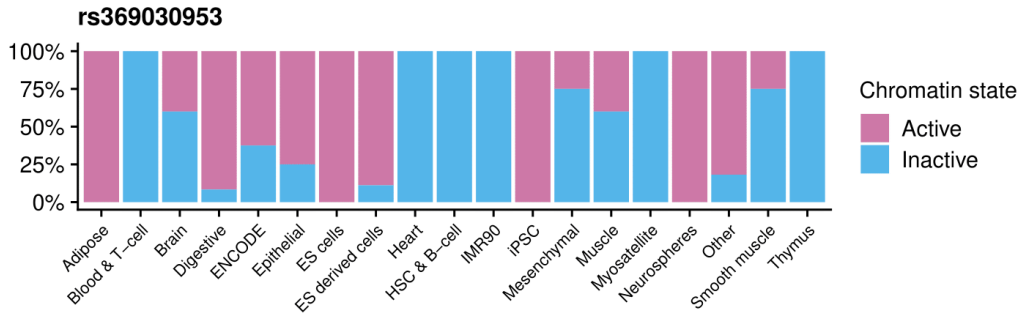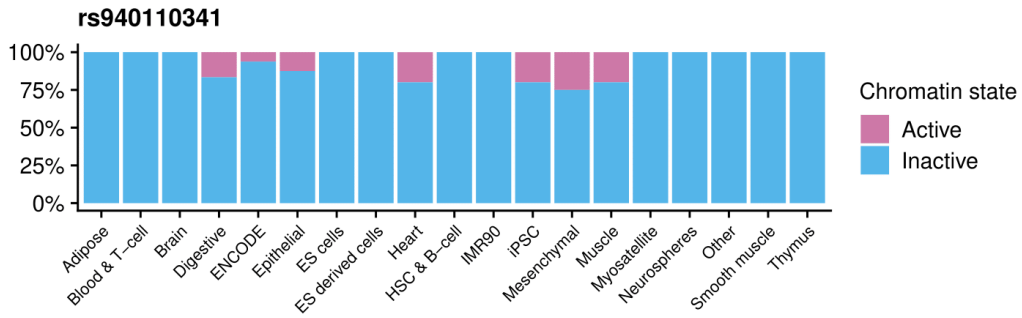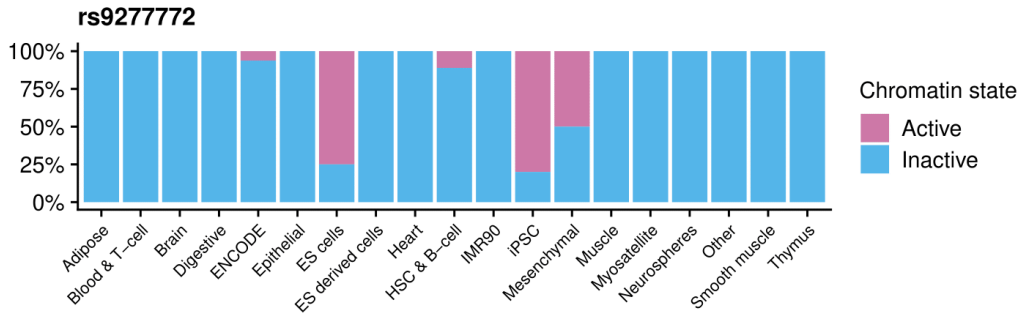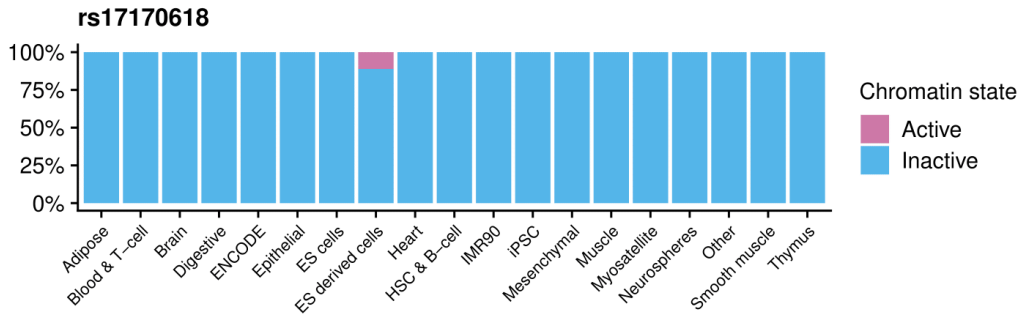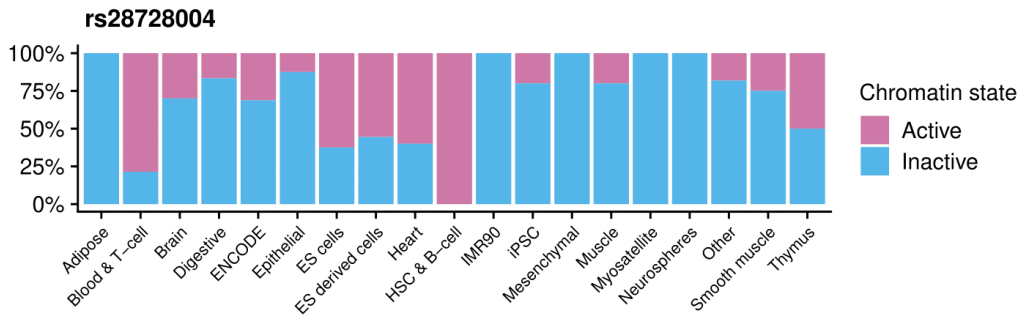



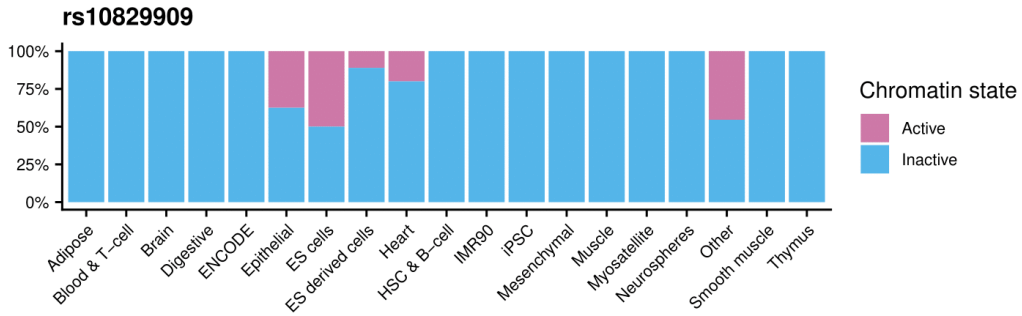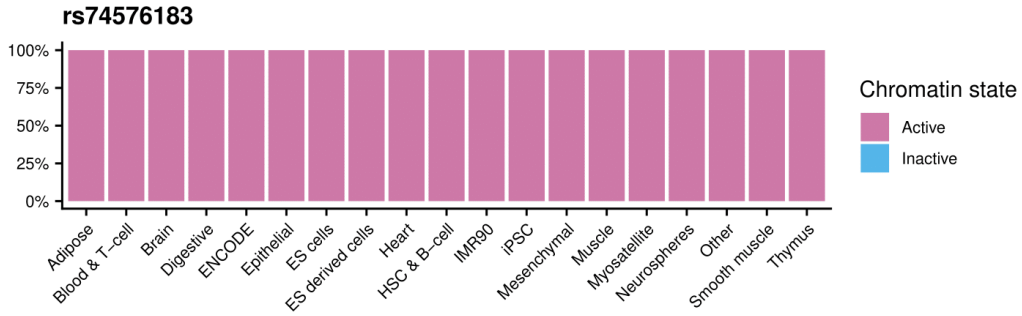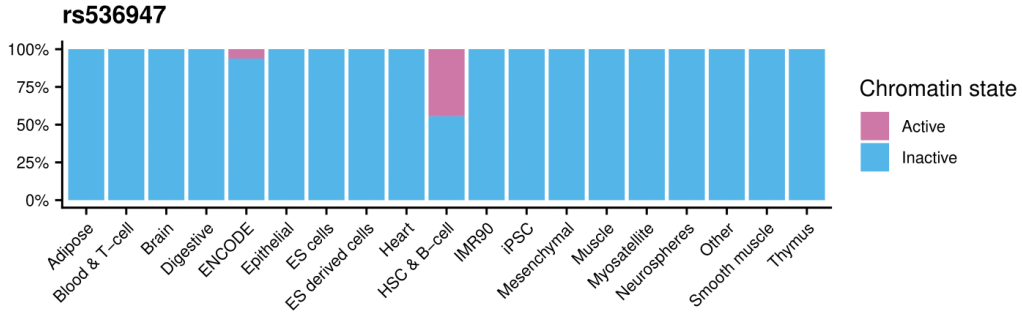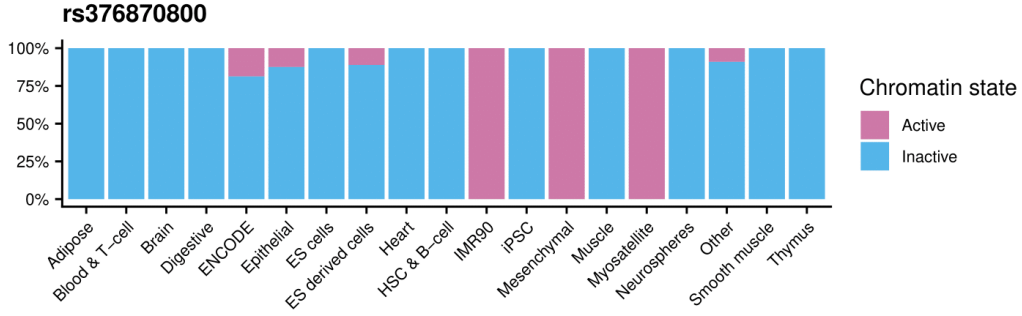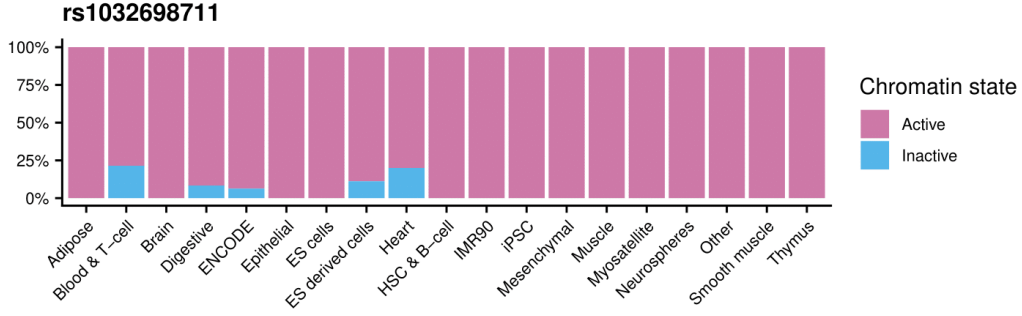

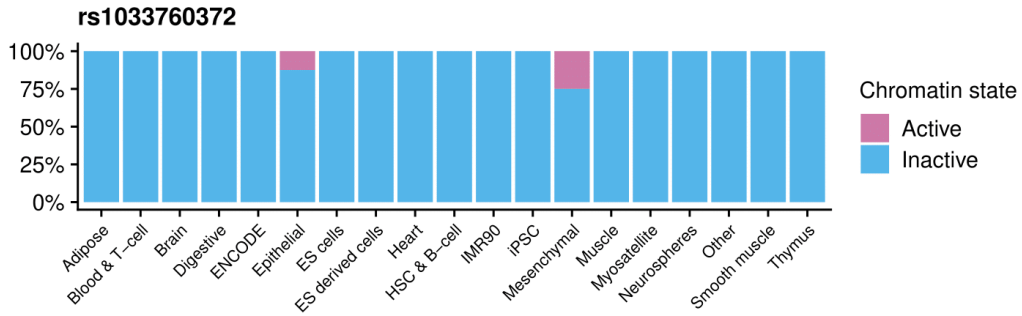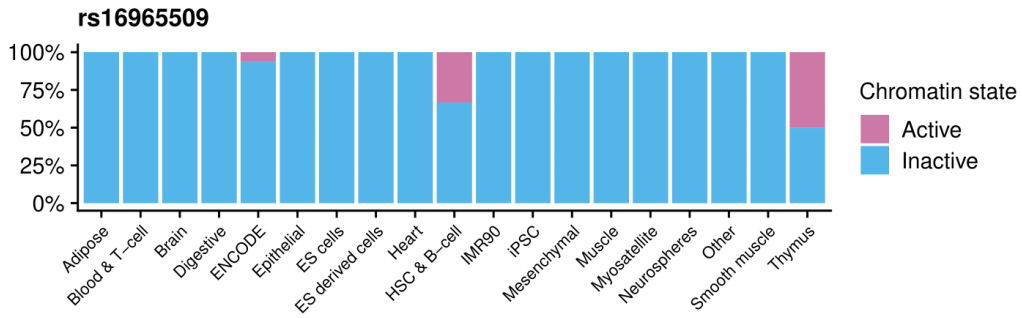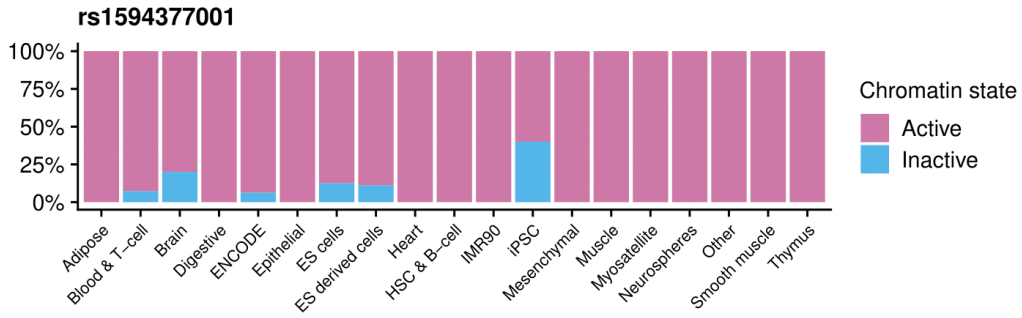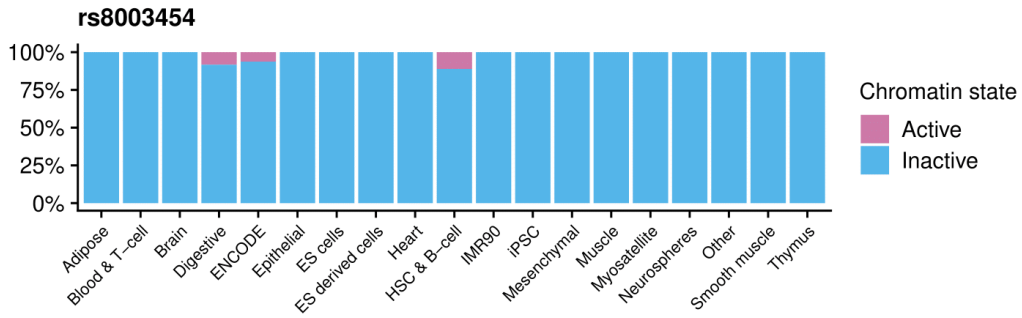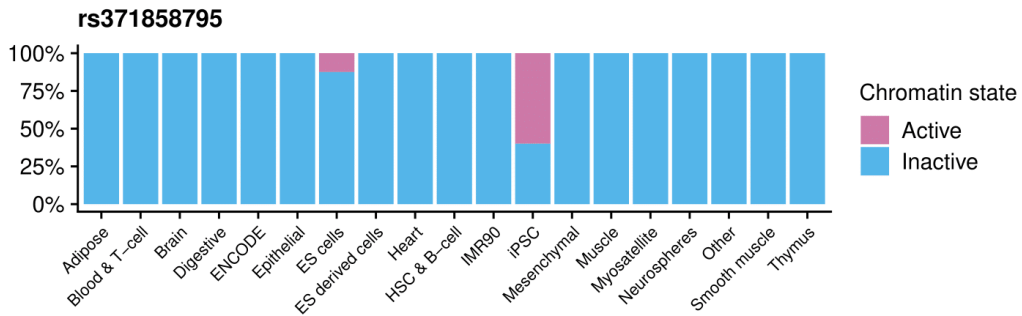

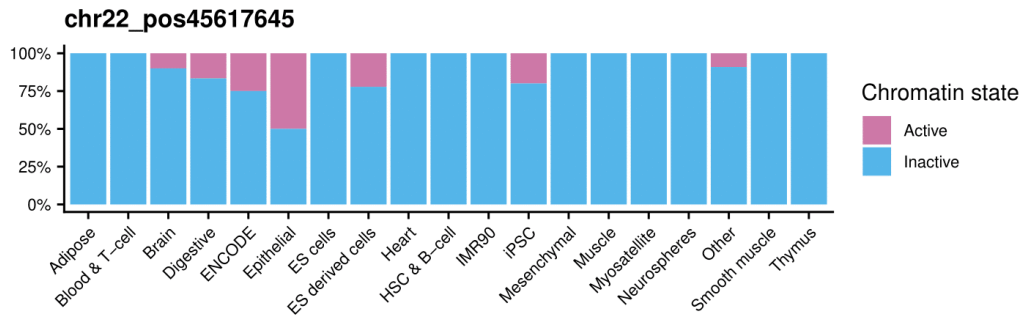

**Figure S13: Chromatin state of the candidate SNPs of PNG highlanders for the epigenomes of the Roadmap project clustered in tissues.** Figure generated with the ggplot2 package (v3.4.2).

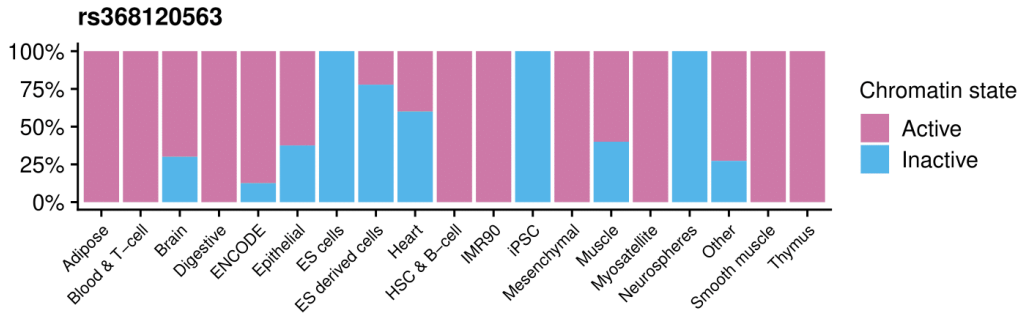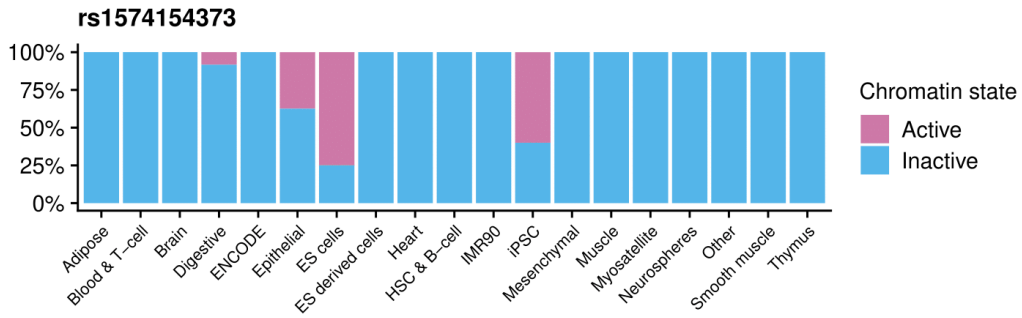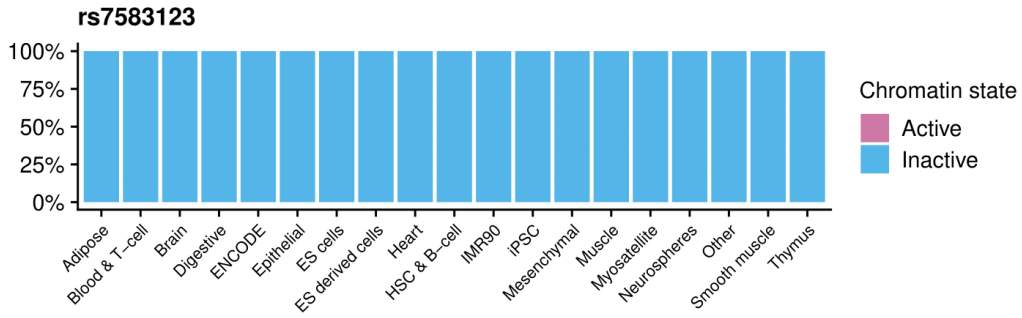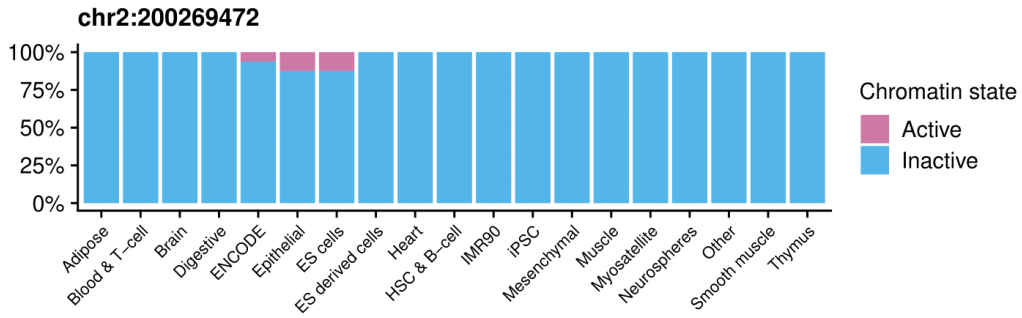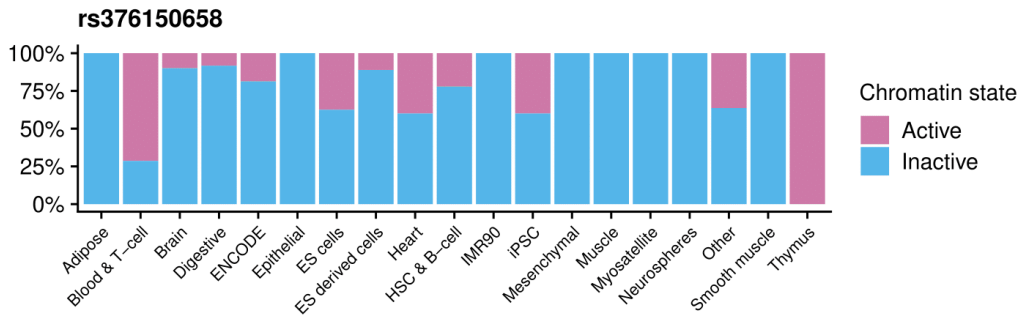

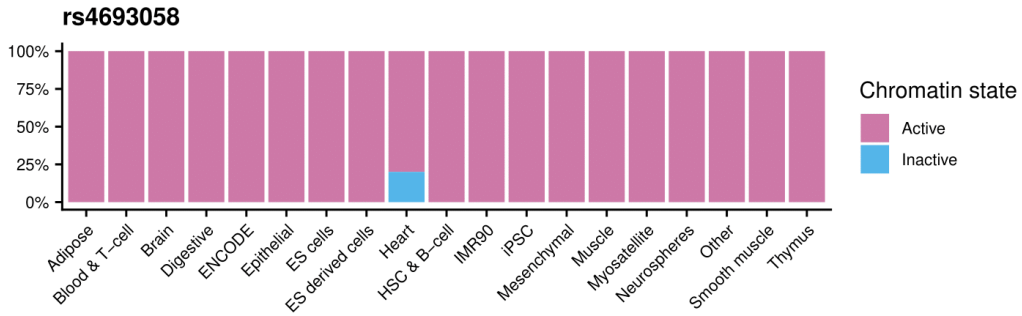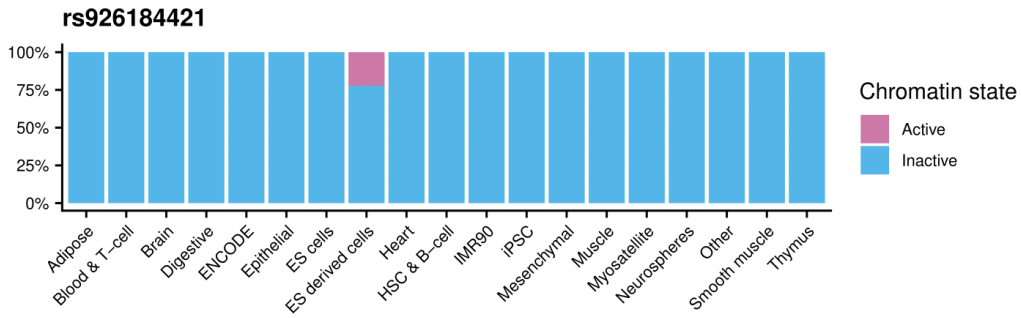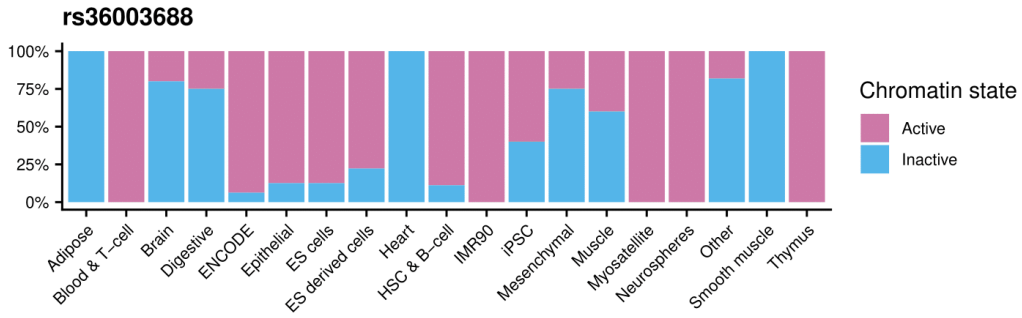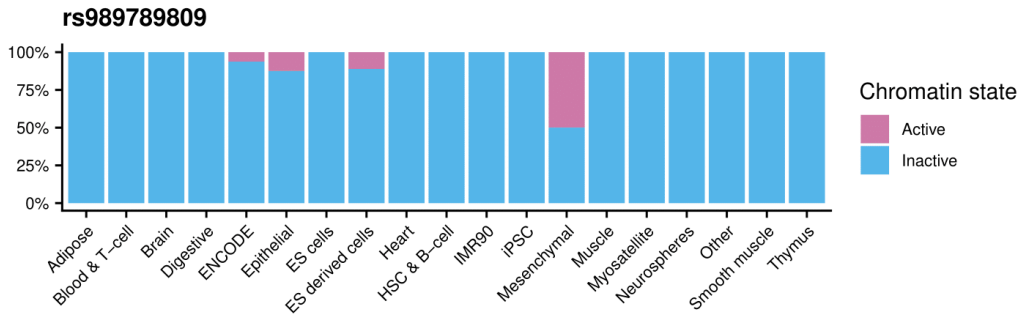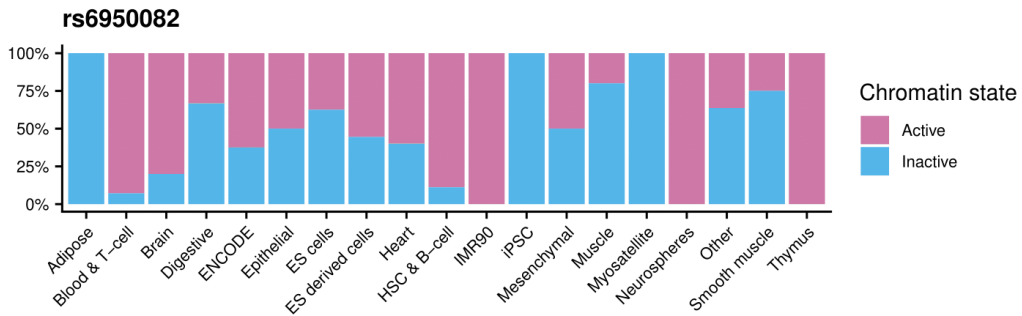

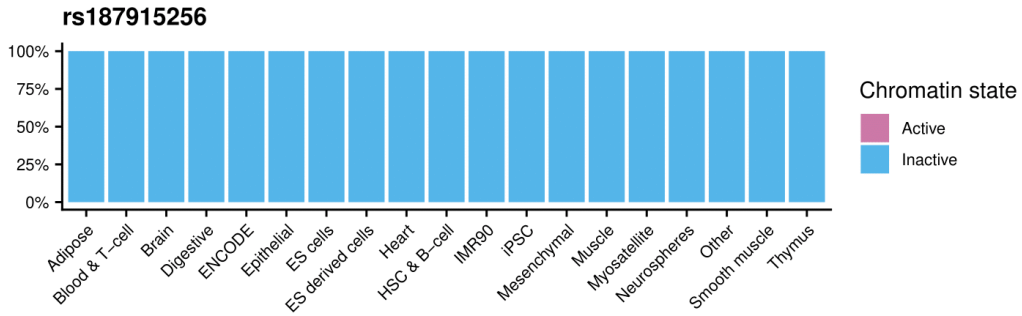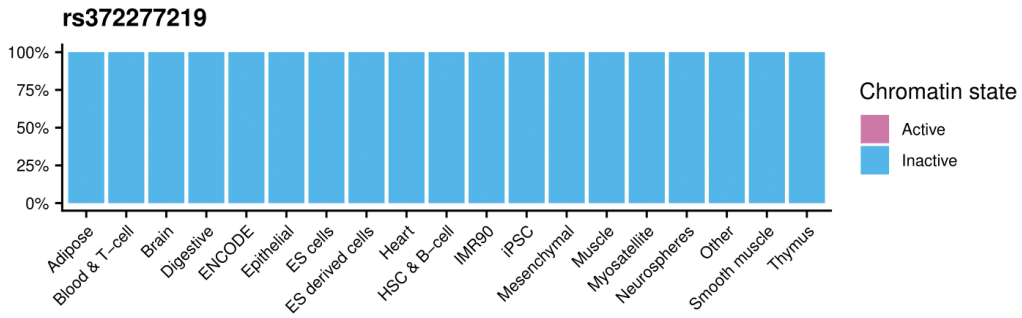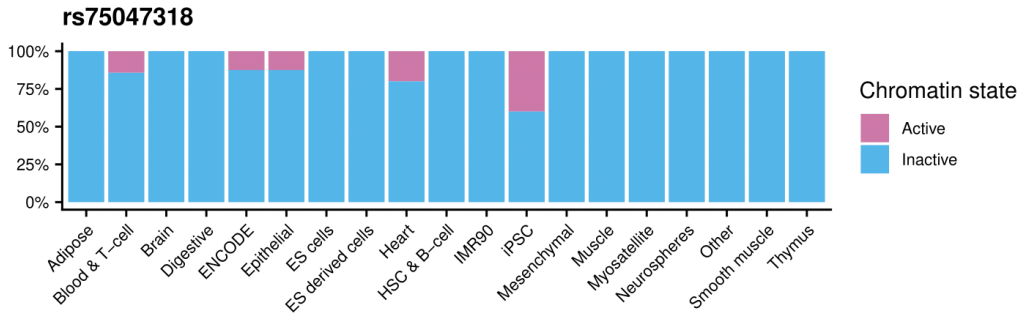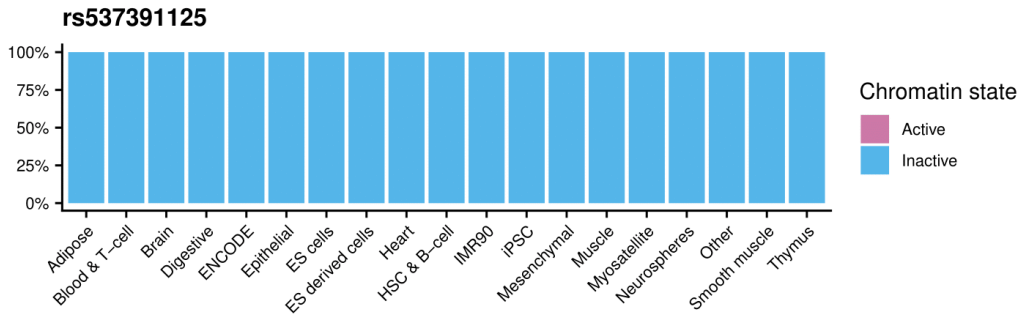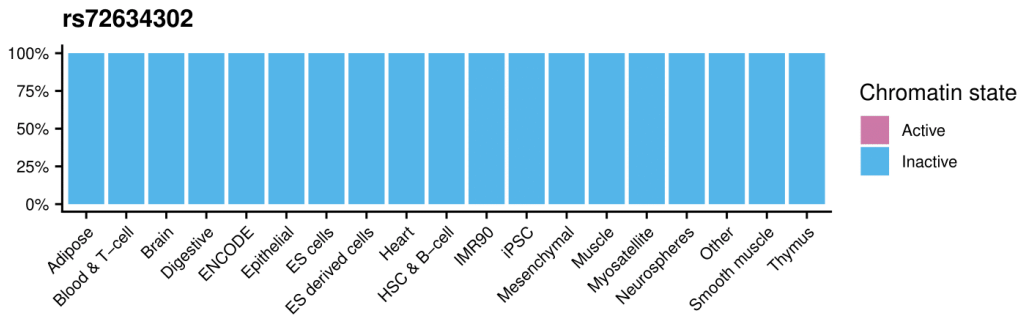

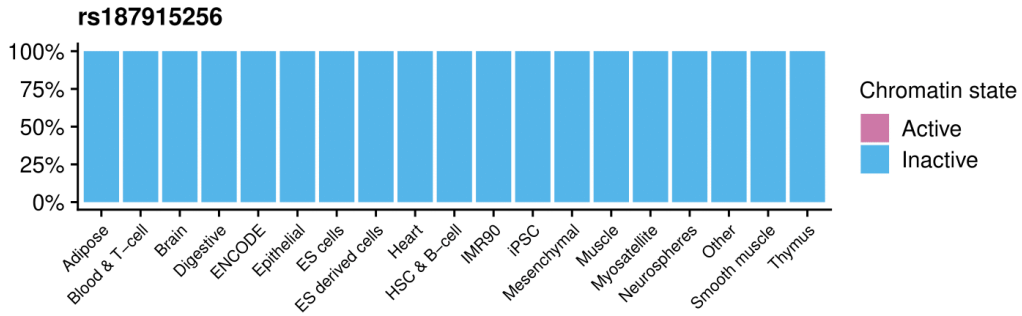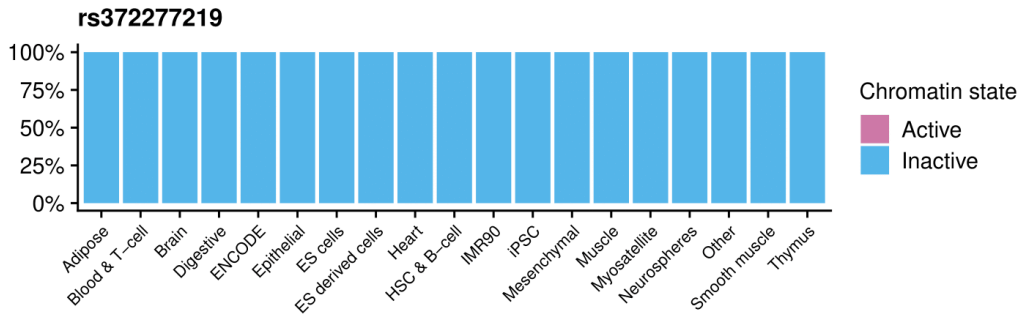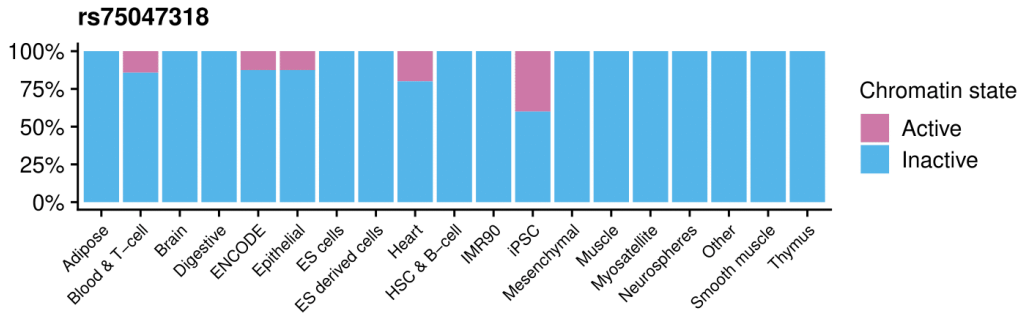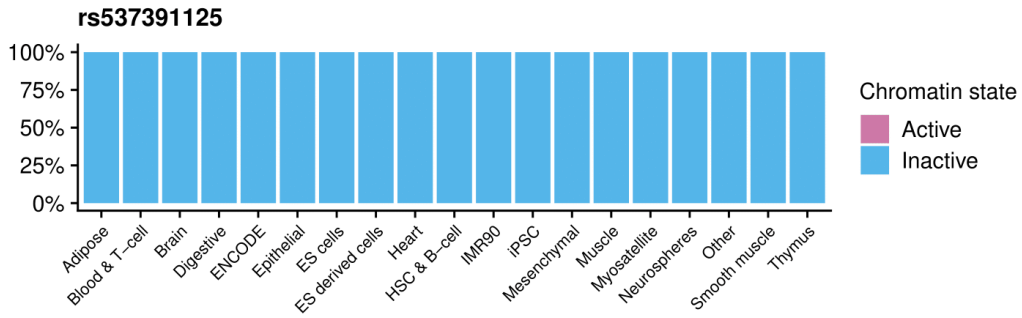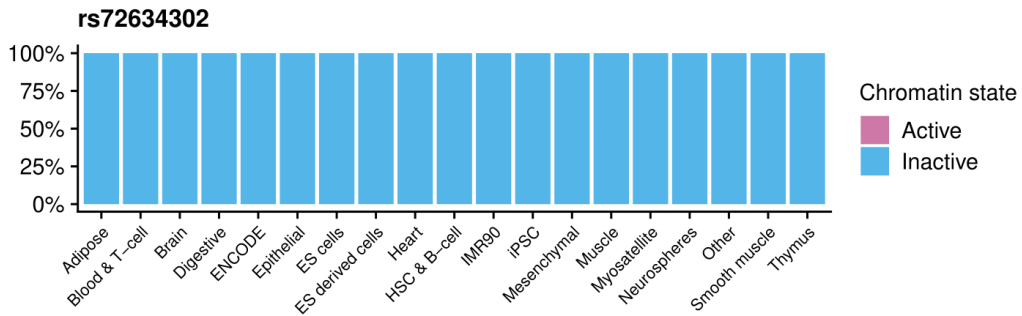

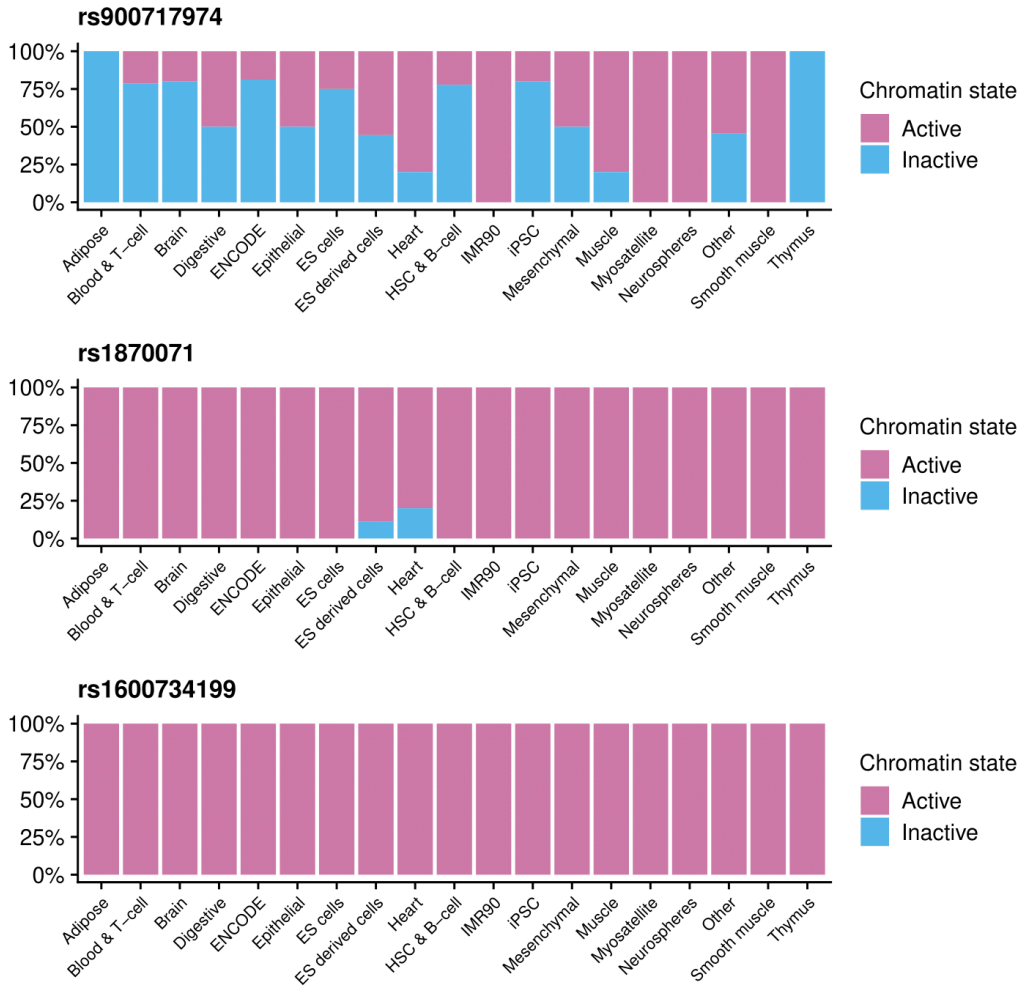

**Figure S14: Chromatin state of the candidate SNPs of PNG lowlanders for the epigenomes of the Roadmap project clustered in tissues.** Figure generated with the ggplot2 package (v3.4.2).



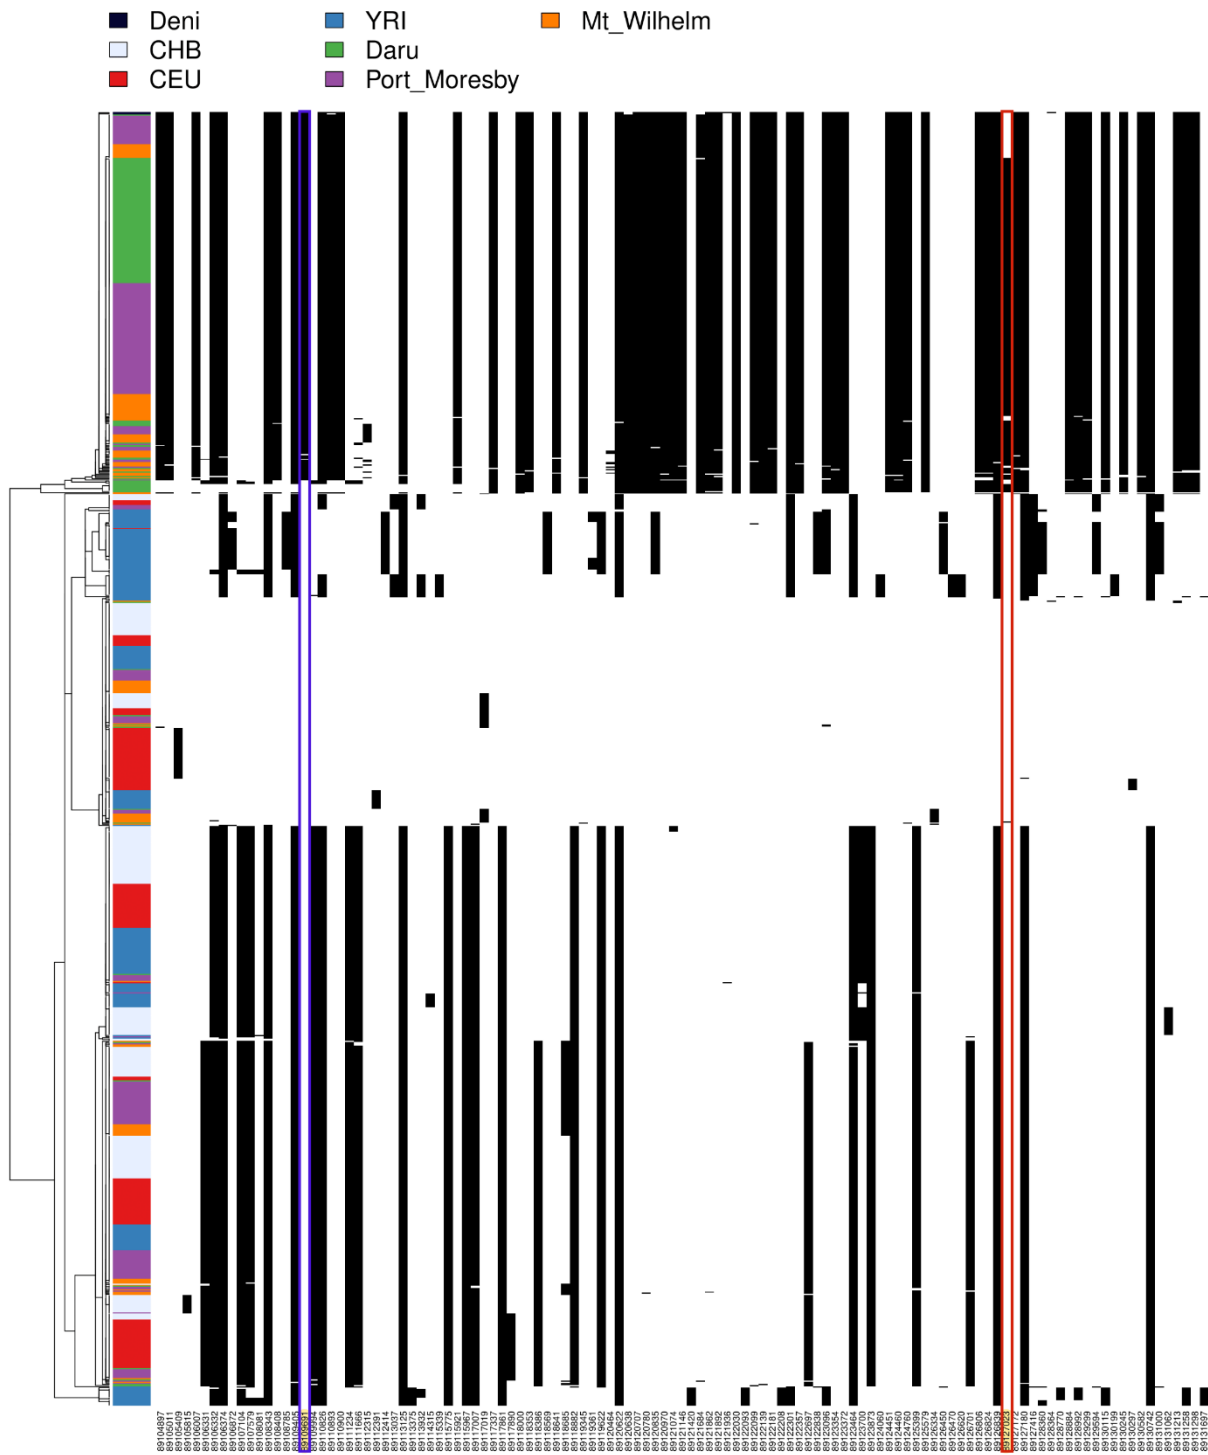

**Figure S15: Haplotrips plot for the region chr1:88800562-89326878 overlapping with the GBP locus and under selection in PNG lowlanders.** Derived alleles are plotted in black, and ancestral are in white. The introgressed haplotype carries the SNP driving selection for the region (rs36812063-T/C, framed in orange), but the Altai Denisovan does not have this particular allele. On the contrary, the missense variant (framed in blue) in LD with rs36812063 is found in the introgressed haplotype and in the Denisovan genome.

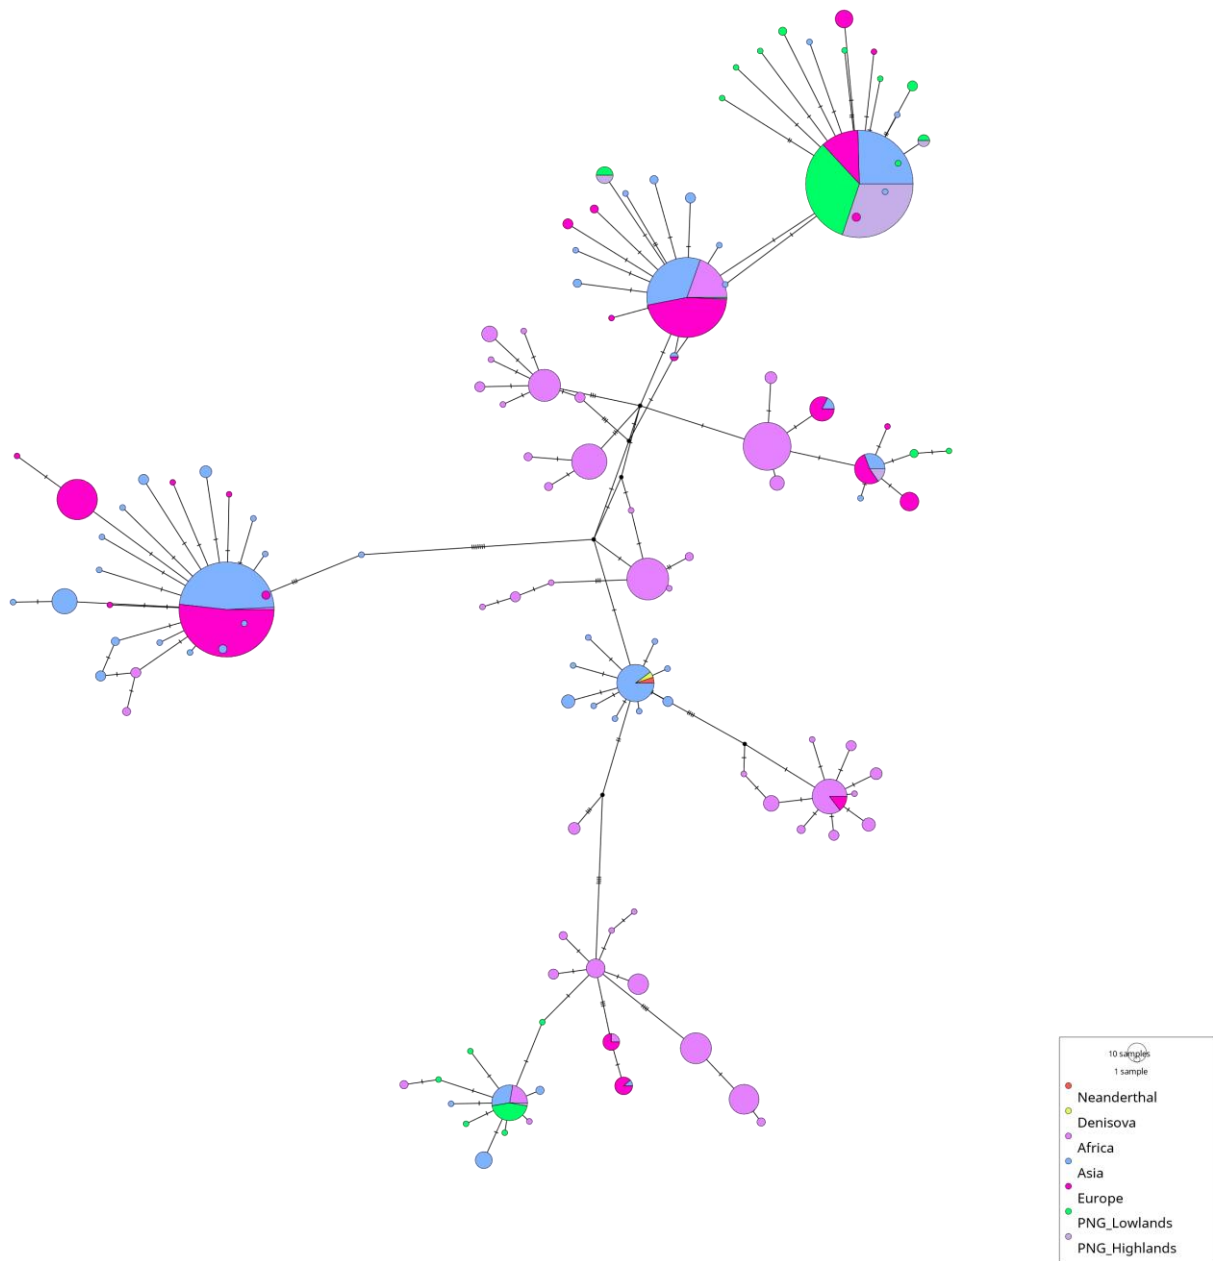

**Figure S16: median-joining haplotype networks for the windows 5kb down- and upstream rs74621527, the candidate SNP for the genomic region chr2:151012094-151201575 under selection in PNG highlanders. This variant is in high-LD ( $r^2 > 0.5$ ) with an introgressed ambiguous (Denisovan and Neanderthal) haplotype.**

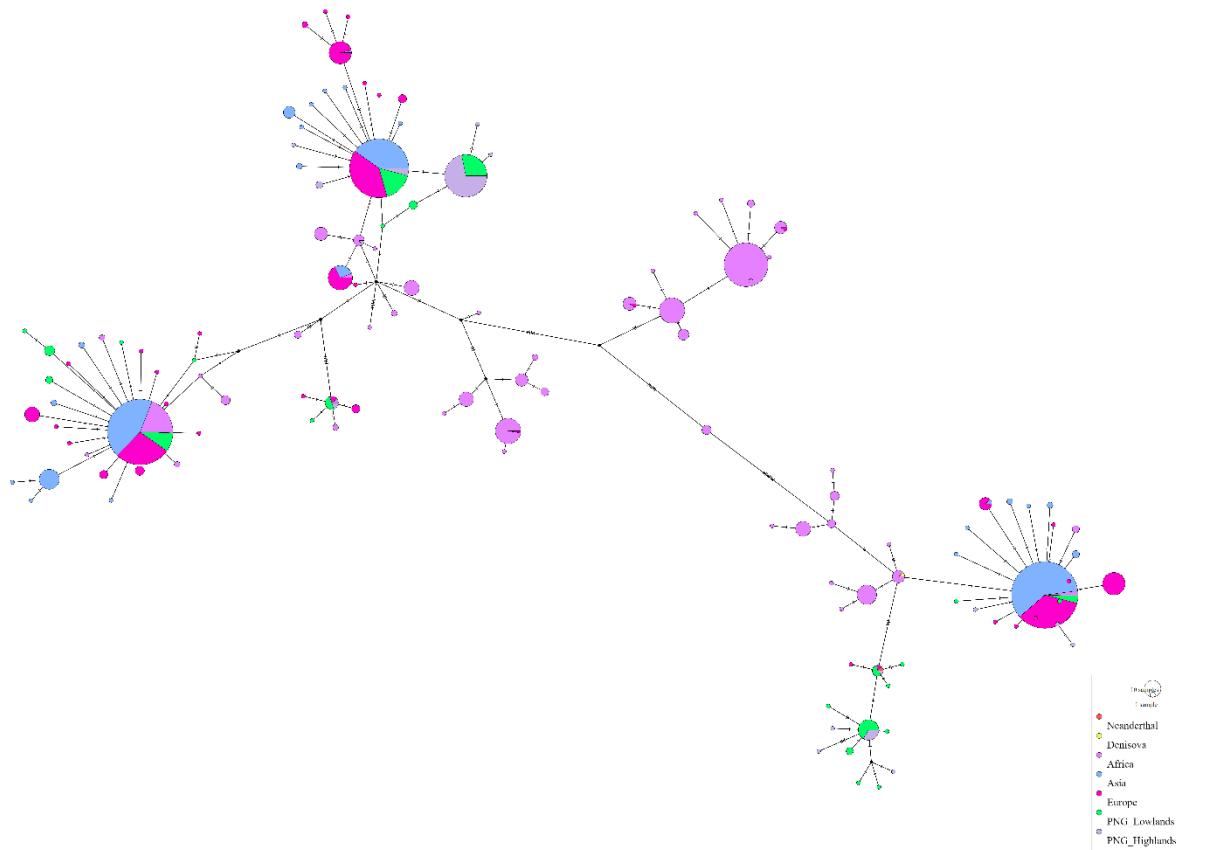

**Figure S17: median-joining haplotype networks for the windows 5kbp down- and upstream rs376870800**, the candidate SNP for the genomic region chr12:58391529-58634980 under selection in PNG highlanders. This variant is in high-LD ( $r^2 > 0.5$ ) with an introgressed ambiguous (Denisovan and Neanderthal) haplotype.

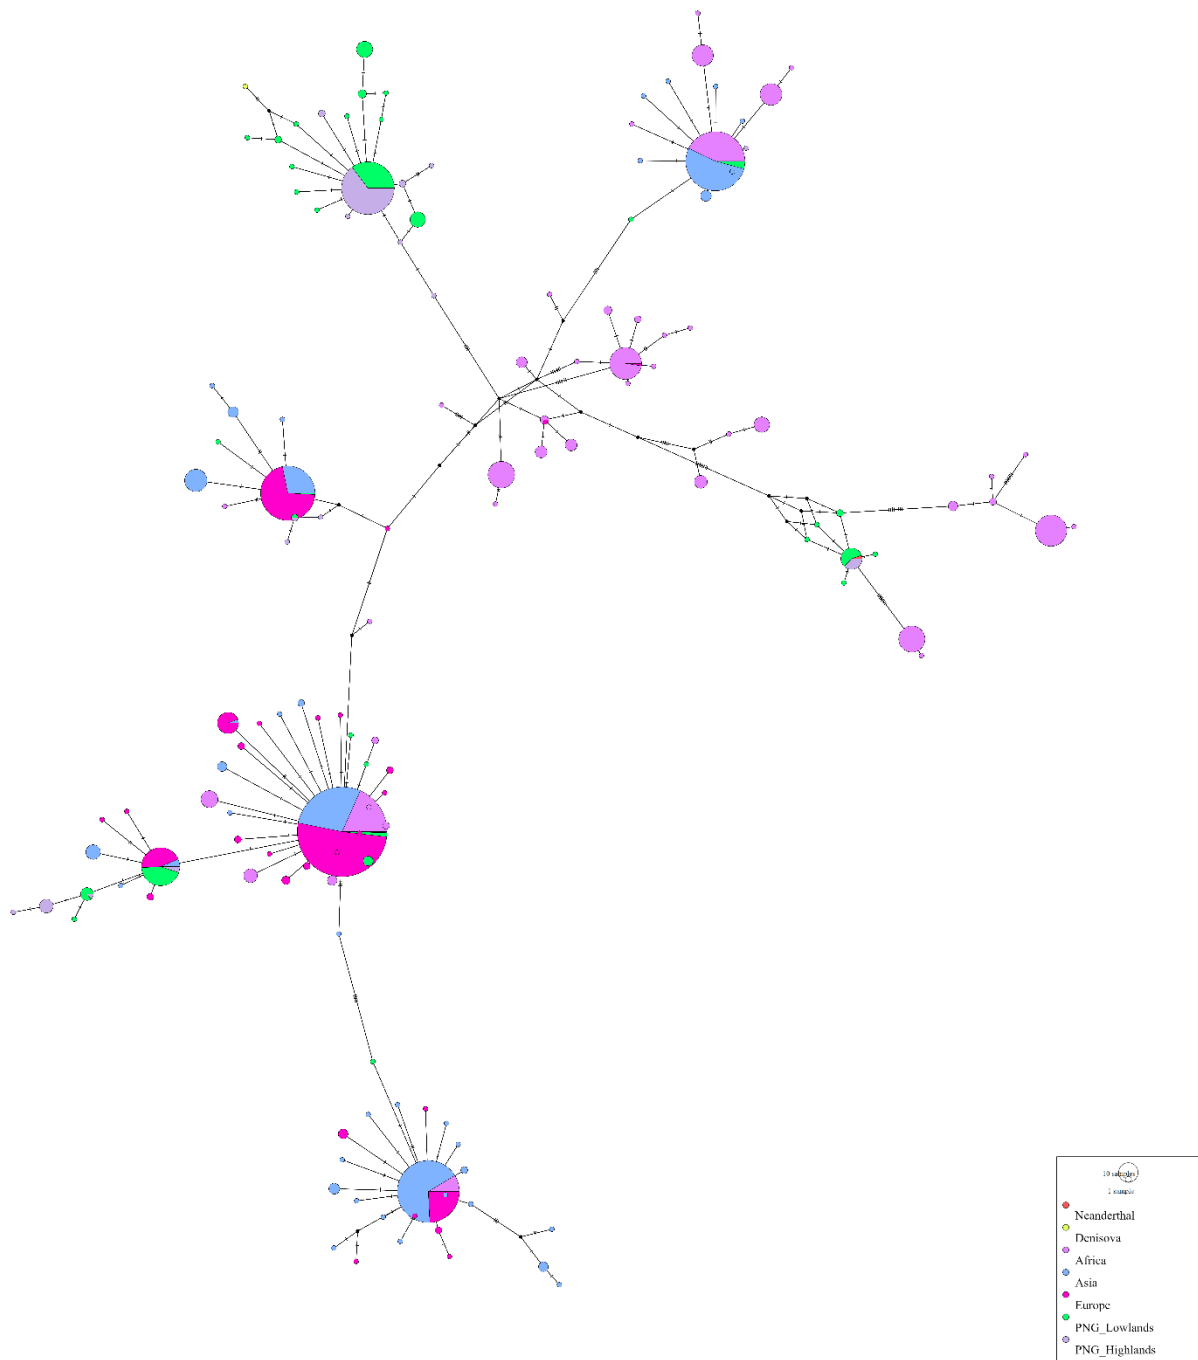

**Figure S18: median-joining haplotype networks for the windows 5kb down- and upstream rs371858795, the candidate SNP for the genomic region chr18:4072997-4251153 under selection in PNG highlanders. This variant is in high-LD ( $r^2 > 0.5$ ) with an introgressed ambiguous (Denisovan and Neanderthal) haplotype.**

Supplementary Tables

**Table S1: Sequences from PNG diversity set I, PNG highlanders, and PNG lowlanders datasets. Sequences kept after quality and kinsh**

|                                        | <b>PNG diversity set I</b> | <b>PNG highlanders</b> | <b>PNG lowlanders</b> | <b>Total</b> |
|----------------------------------------|----------------------------|------------------------|-----------------------|--------------|
| <b>All sequences</b>                   | 122                        | 60                     | 80                    | 262          |
| <b>Variant calling quality control</b> | 0                          | 0                      | 1                     | 1            |
| <b>mislabelled</b>                     | 0                          | 4                      | 0                     | 4            |
| <b>kinship</b>                         | 1                          | 1                      | 4                     | 6            |
| <b>Low call rate</b>                   | 0                          | 1                      | 1                     | 2            |
| <b>Total Removed</b>                   | 1                          | 6                      | 6                     | 13           |
| <b>Total Sequences kept</b>            | 121                        | 54                     | 74                    | 249          |

**Table S2: Count of the phenotype measurements for each sampling places**

|                       | <b>PNG lowlanders</b> | <b>PNG highlanders</b> | <b>PNG diversity set I</b> | <b>Total</b> |
|-----------------------|-----------------------|------------------------|----------------------------|--------------|
| <b>number_all</b>     | 72                    | 52                     | 110                        | 234          |
| <b>mean age</b>       | 45                    | 35                     | 24.3                       | 33           |
| <b>Number_M</b>       | 63                    | 45                     | 53                         | 161          |
| <b>Number_F</b>       | 9                     | 7                      | 57                         | 73           |
| <b>Height</b>         | 72                    | 51                     | 110                        | 233          |
| <b>Weight</b>         | 72                    | 52                     | 110                        | 234          |
| <b>BMI</b>            | 72                    | 51                     | 110                        | 233          |
| <b>Waist</b>          | 72                    | 52                     | 13                         | 137          |
| <b>Chest_min</b>      | 64                    | 33                     | 12                         | 109          |
| <b>Chest_max</b>      | 64                    | 34                     | 12                         | 110          |
| <b>FVC</b>            | 27                    | 16                     | 0                          | 43           |
| <b>FEV1</b>           | 27                    | 16                     | 0                          | 43           |
| <b>PEF</b>            | 27                    | 16                     | 0                          | 43           |
| <b>Dia</b>            | 72                    | 52                     | 24                         | 148          |
| <b>Sys</b>            | 72                    | 52                     | 24                         | 148          |
| <b>HeartbeatFinal</b> | 72                    | 52                     | 108                        | 232          |
| <b>Haemoglobine</b>   | 56                    | 50                     | 20                         | 126          |

**Table S6: D-statistic analysis of the form D(W,X;Y,Z )**

| <b>Pop1 (W)</b> | <b>Pop2 (X)</b> | <b>Pop3 (Y)</b> | <b>Pop4 (Z)</b> | <b>D(W,X,Y,Z)</b> | <b>Z</b> | <b>BABA</b> | <b>ABBA</b> |
|-----------------|-----------------|-----------------|-----------------|-------------------|----------|-------------|-------------|
| PNG highlanders | PNG lowlanders  | CHB             | YRI             | -0.0002           | -0.145   | 224222      | 224291      |
| PNG highlanders | PNG diversity I | CHB             | YRI             | -0.0232           | -22.874* | 227731      | 238535      |
| PNG diversity I | PNG lowlanders  | CHB             | YRI             | 0.0226            | 30.339*  | 242492      | 231756      |

\* statistically significant admixture ( $|Z| > 3$ )

D < 0 reflects a excess in ABBA and a gene flow between pop 2 and pop3

D > 0 reflects a excess in BABA and a gene flow between pop 1 and pop3



**Table S4: Top regions under selection in PNG highlanders**

P-value were computed using a one sided random sampling approach (Skoglund et al., 2017).

The detailed approach description can be found in the supplementary note S9.

| CHR                 | Start (BP,GRCh38) | End (BP,GRCh38) | Score | Z     | p-value  |
|---------------------|-------------------|-----------------|-------|-------|----------|
| <b>XP-EHH</b>       |                   |                 |       |       |          |
| 18                  | 4132370           | 4199172         | 6.176 | 6.211 | 2.64E-10 |
| 12                  | 58448770          | 58576778        | 6.062 | 6.098 | 5.37E-10 |
| 12                  | 6502552           | 6612260         | 5.090 | 5.136 | 1.40E-07 |
| 1                   | 95579290          | 95686826        | 5.038 | 5.085 | 1.84E-07 |
| 9                   | 85508922          | 85695092        | 5.016 | 5.063 | 2.06E-07 |
| 4                   | 152754503         | 152920509       | 5.007 | 5.054 | 2.16E-07 |
| 4                   | 110232324         | 110334099       | 4.931 | 4.979 | 3.20E-07 |
| 6                   | 30966070          | 31103184        | 4.905 | 4.953 | 3.66E-07 |
| 3                   | 13118431          | 13167789        | 4.636 | 4.686 | 1.39E-06 |
| 3                   | 13060340          | 13100805        | 4.608 | 4.658 | 1.59E-06 |
| <b>PBS</b>          |                   |                 |       |       |          |
| 22                  | 45569818          | 45594906        | 1.134 | 4.872 | 5.52E-07 |
| 12                  | 58442097          | 58469168        | 0.634 | 3.980 | 3.45E-05 |
| 3                   | 61894529          | 61953999        | 0.602 | 3.899 | 4.82E-05 |
| 7                   | 147640904         | 147668219       | 0.588 | 3.864 | 5.58E-05 |
| 2                   | 151062094         | 151151575       | 0.587 | 3.861 | 5.66E-05 |
| 10                  | 131162245         | 131185951       | 0.585 | 3.855 | 5.79E-05 |
| 6                   | 33057609          | 33082312        | 0.582 | 3.848 | 5.94E-05 |
| 13                  | 47689988          | 47775193        | 0.548 | 3.755 | 8.66E-05 |
| 12                  | 58482695          | 58583316        | 0.546 | 3.749 | 8.88E-05 |
| 13                  | 104785633         | 104825020       | 0.534 | 3.715 | 1.02E-04 |
| <b>Fisher Score</b> |                   |                 |       |       |          |
| 12                  | 58441529          | 58584980        | 8.846 | 3.096 | 9.81E-04 |
| 18                  | 4122997           | 4201153         | 8.250 | 3.015 | 1.28E-03 |
| 12                  | 103833315         | 104071479       | 6.713 | 2.777 | 2.74E-03 |
| 22                  | 45575411          | 45590656        | 6.429 | 2.727 | 3.20E-03 |
| 6                   | 33056055          | 33082312        | 6.264 | 2.697 | 3.50E-03 |
| 12                  | 9936812           | 10005333        | 6.251 | 2.695 | 3.52E-03 |
| 13                  | 104784734         | 104816123       | 6.193 | 2.684 | 3.64E-03 |
| 3                   | 61829523          | 61959858        | 6.193 | 2.684 | 3.64E-03 |
| 14                  | 60207772          | 60327317        | 6.124 | 2.671 | 3.78E-03 |
| 14                  | 92280479          | 92351520        | 6.124 | 2.671 | 3.79E-03 |

**Table S5: Top regions under selection in PNG lowlanders**

P-value were computed using a one sided random sampling approach (Skoglund et al., 2017).

The detailed approach description can be found in the supplementary note S9.

| CHR                 | Start (BP,GRCh38) | End (BP,GRCh38) | Score  | Z      | p-value  |
|---------------------|-------------------|-----------------|--------|--------|----------|
| <b>XP-EHH</b>       |                   |                 |        |        |          |
| 1                   | 88990863          | 89202535        | -5.968 | -5.810 | 3.12E-09 |
| 2                   | 241871368         | 241989102       | -4.906 | -4.759 | 9.71E-07 |
| 13                  | 61640770          | 61943327        | -4.843 | -4.697 | 1.32E-06 |
| 17                  | 54053406          | 54172843        | -4.710 | -4.565 | 2.49E-06 |
| 7                   | 129604951         | 129773933       | -4.598 | -4.454 | 4.21E-06 |
| 16                  | 87856834          | 87878392        | -4.500 | -4.357 | 6.59E-06 |
| 19                  | 16394294          | 16526199        | -4.435 | -4.293 | 8.81E-06 |
| 14                  | 37187933          | 37332802        | -4.426 | -4.284 | 9.16E-06 |
| 9                   | 93767217          | 93827803        | -4.318 | -4.177 | 1.48E-05 |
| 5                   | 65554470          | 65658617        | -4.288 | -4.147 | 1.68E-05 |
| <b>PBS</b>          |                   |                 |        |        |          |
| 1                   | 89070336          | 89276878        | 0.776  | 4.469  | 3.93E-06 |
| 8                   | 133841891         | 133912825       | 0.540  | 3.958  | 3.79E-05 |
| 2                   | 241809136         | 242016140       | 0.477  | 3.782  | 7.79E-05 |
| 14                  | 77362867          | 77495559        | 0.470  | 3.761  | 8.45E-05 |
| 1                   | 237877847         | 237942467       | 0.433  | 3.645  | 1.34E-04 |
| 19                  | 54226104          | 54280609        | 0.425  | 3.619  | 1.48E-04 |
| 2                   | 124135628         | 124199405       | 0.415  | 3.585  | 1.68E-04 |
| 19                  | 11758670          | 12058034        | 0.400  | 3.531  | 2.07E-04 |
| 2                   | 200288798         | 200382145       | 0.393  | 3.508  | 2.26E-04 |
| 6                   | 85316477          | 85433888        | 0.388  | 3.489  | 2.43E-04 |
| <b>Fisher Score</b> |                   |                 |        |        |          |
| 1                   | 88850562          | 89276878        | 10.317 | 3.607  | 1.55E-04 |
| 2                   | 241866673         | 242038831       | 7.383  | 3.184  | 7.27E-04 |
| 7                   | 129598370         | 129786070       | 6.670  | 3.056  | 1.12E-03 |
| 14                  | 77362867          | 77508267        | 6.332  | 2.990  | 1.40E-03 |
| 18                  | 41183289          | 41568597        | 6.315  | 2.986  | 1.41E-03 |
| 4                   | 171841098         | 171936729       | 6.220  | 2.967  | 1.50E-03 |
| 4                   | 82800503          | 83096792        | 6.219  | 2.967  | 1.50E-03 |
| 12                  | 120403731         | 120616335       | 6.137  | 2.950  | 1.59E-03 |
| 19                  | 54226104          | 54280609        | 6.119  | 2.947  | 1.61E-03 |
| 13                  | 89710867          | 89870623        | 6.061  | 2.935  | 1.67E-03 |

Table S6: Candidate SNPs driving selection in PNG highlanders

| CHR | rs id        | XP-EHH<br>SNP | PBS<br>SNP | Daf<br>HL | Daf<br>LL | mean logLR HL<br>95%CI | mean sel coef HL<br>95%CI | mean logLR LL 95%<br>CI | mean sel coef LL<br>95%CI | F <sub>ST</sub> HL<br>LL | DAF<br>CHB | DAF EUR<br>(UKBB) | distance to the<br>closest SNP<br>in UKBB (GRCh38) | Top association<br>UKBiobank | -LOG(pval) | Beta* | Top assoc pheno<br>gemma                          | pval<br>gemma | Beta<br>gemma* | variant<br>consequences<br>(VEP) |                          |      |       |                              |
|-----|--------------|---------------|------------|-----------|-----------|------------------------|---------------------------|-------------------------|---------------------------|--------------------------|------------|-------------------|----------------------------------------------------|------------------------------|------------|-------|---------------------------------------------------|---------------|----------------|----------------------------------|--------------------------|------|-------|------------------------------|
| 1   | rs887476833  | 2.458         | 0.528      | 0.546     | 0.189     | 5.257 [4.319-6.055]    | 0.006 [0.004-0.008]       | 1.53 [1.239-1.994]      | 0.003 [0.003-0.004]       | 0.242                    | 0.000      | NA                | 33                                                 | .                            | .          | .     | Height                                            | 0.46          | -1.26          |                                  |                          |      |       |                              |
| 2   | rs74621527   | 0.322         | 0.552      | 0.917     | 0.804     | 2.804 [1.674-4.724]    | 0.004 [0.003-0.005]       | 0.809 [0.348-1.257]     | 0.002 [0.001-0.002]       | 0.041                    | 0.165      | 0.098             | 50                                                 | .                            | .          | .     | Forced volume capacity                            | 0.51          | 0.38           |                                  |                          |      |       |                              |
| 3   | rs374181005  | 1.625         | 0.223      | 0.407     | 0.236     | 5.889 [4.883-6.829]    | 0.009 [0.006-0.012]       | 2.476 [1.931-3.526]     | 0.004 [0.003-0.005]       | 0.059                    | 0.000      | 0.011             | 50                                                 | .                            | .          | .     | Height                                            | 0.44          | 1.31           |                                  |                          |      |       |                              |
| 3   | rs79600167   | 2.939         | 0.656      | 0.769     | 0.412     | 5.672 [2.95-7.854]     | 0.004 [0.003-0.006]       | 2.626 [1.55-3.244]      | 0.002 [0.002-0.003]       | 0.222                    | 0.000      | NA                | .                                                  | .                            | .          | .     | Forced volume capacity                            | 0.55          | -0.21          | regulatory region<br>variant     |                          |      |       |                              |
| 4   | rs943845085  | 3.406         | 0.528      | 0.417     | 0.054     | 4.584 [3.801-5.192]    | 0.006 [0.005-0.008]       | 2.804 [2.183-3.477]     | 0.02 [0.014-0.026]        | 0.327                    | 0.000      | NA                | 22                                                 | .                            | .          | .     | Diastolic blood pressure                          | 0.46          | -3.58          |                                  |                          |      |       |                              |
| 4   | rs369030953  | 1.954         | 0.580      | 0.593     | 0.216     | 4.185 [3.178-5.223]    | 0.004 [0.003-0.006]       | 1.431 [1.265-1.529]     | 0.002 [0.002-0.003]       | 0.256                    | 0.000      | NA                | .                                                  | .                            | .          | .     | Diastolic blood pressure                          | 0.48          | -2.58          |                                  |                          |      |       |                              |
| 6   | rs940110341  | 4.720         | 0.610      | 0.611     | 0.223     | 7.149 [6.131-8.264]    | 0.007 [0.005-0.008]       | 2.209 [2.003-2.502]     | 0.004 [0.003-0.004]       | 0.267                    | 0.000      | NA                | 94                                                 | .                            | .          | .     | Haemoglobin concentration                         | 0.17          | 0.89           |                                  |                          |      |       |                              |
| 6   | rs9277772    | 0.810         | 0.016      | 0.213     | 0.216     | 3.243 [2.306-4.244]    | 0.012 [0.008-0.019]       | 1.719 [1.275-1.956]     | 0.003 [0.002-0.004]       | -0.008                   | 0.257      | 0.157             | .                                                  | .                            | .          | .     | <b>Non-cancer illness<br/>code, self-reported</b> |               | -124.40        | 0.24                             | Diastolic blood pressure | 0.67 | 2.03  | regulatory region<br>variant |
| 7   | rs17170618   | 0.245         | 0.052      | 0.519     | 0.514     | 3.892 [2.951-4.774]    | 0.005 [0.003-0.007]       | 5.088 [3.84-6.138]      | 0.003 [0.003-0.004]       | -0.008                   | 0.335      | 0.191             | .                                                  | .                            | .          | .     | Diastolic blood pressure                          | 0.46          | -2.90          |                                  |                          |      |       |                              |
| 9   | rs28728004   | 3.859         | 0.475      | 0.685     | 0.419     | 5.119 [4.111-5.92]     | 0.004 [0.003-0.006]       | 4.294 [3.751-4.746]     | 0.004 [0.003-0.004]       | 0.126                    | 0.015      | NA                | 7                                                  | .                            | .          | .     | Diastolic blood pressure                          | 0.60          | -2.21          |                                  |                          |      |       |                              |
| 10  | rs10829909   | -0.755        | 0.064      | 0.426     | 0.338     | 3.169 [1.879-4.323]    | 0.005 [0.003-0.007]       | 0.434 [0.143-0.634]     | 0.001 [0.001-0.001]       | 0.008                    | 0.121      | 0.125             | .                                                  | .                            | .          | .     | Waist circumference                               | 0.14          | 2.95           |                                  |                          |      |       |                              |
| 12  | rs74576183   | 4.612         | 0.480      | 0.713     | 0.459     | 4.142 [2.462-5.901]    | 0.003 [0.003-0.004]       | 3.738 [3.443-4.047]     | 0.003 [0.003-0.003]       | 0.116                    | 0.117      | 0.009             | .                                                  | .                            | .          | .     | <b>Red blood cell<br/>(erythrocyte) count</b>     |               | -11.74         | 0.05                             | Heart rate               | 0.05 | -2.98 |                              |
| 12  | rs536947     | 3.425         | 0.313      | 0.907     | 0.466     | 4.263 [2.541-6.715]    | 0.004 [0.003-0.005]       | 0.152 [0.02-0.389]      | 0 [0-0.001]               | 0.347                    | 0.199      | 0.156             | .                                                  | .                            | .          | .     | Minimal chest depth                               | 0.30          | 0.61           |                                  |                          |      |       |                              |
| 12  | rs376870800  | 4.444         | 0.830      | 0.704     | 0.230     | 6.624 [4.751-7.641]    | 0.005 [0.004-0.006]       | 2.264 [1.847-2.663]     | 0.004 [0.003-0.005]       | 0.366                    | 0.000      | NA                | 160                                                | .                            | .          | .     | Height                                            | 0.62          | -0.56          | regulatory region<br>variant     |                          |      |       |                              |
| 12  | rs1032698711 | 2.643         | 0.893      | 0.472     | 0.243     | 8.483 [7.41-9.504]     | 0.012 [0.009-0.015]       | 5.352 [4.522-5.982]     | 0.007 [0.006-0.009]       | 0.103                    | 0.000      | NA                | 22                                                 | .                            | .          | .     | Diastolic blood pressure                          | 0.60          | -2.24          |                                  |                          |      |       |                              |
| 13  | rs1033760372 | 0.854         | -0.017     | 0.194     | 0.250     | 4.696 [3.346-7.093]    | 0.006 [0.004-0.010]       | 4.249 [3.740-4.870]     | 0.007 [0.006-0.008]       | 0.001                    | 0.000      | NA                | 34                                                 | .                            | .          | .     | Diastolic blood pressure                          | 0.18          | -5.83          |                                  |                          |      |       |                              |
| 13  | rs16965509   | -0.172        | 0.360      | 0.500     | 0.243     | 4.065 [2.859-5.072]    | 0.024 [0.016-0.032]       | 0.869 [0.336-1.566]     | 0.002 [0.001-0.002]       | 0.128                    | 0.451      | 0.052             | .                                                  | .                            | .          | .     | Diastolic blood pressure                          | 0.46          | -2.84          |                                  |                          |      |       |                              |
| 14  | rs1033848215 | 0.669         | 0.018      | 0.324     | 0.345     | 3.535 [2.592-4.714]    | 0.008 [0.005-0.013]       | 3.761 [3.145-4.091]     | 0.004 [0.003-0.004]       | 0.021                    | 0.000      | NA                | 2                                                  | .                            | .          | .     | Height                                            | 0.34          | -1.44          |                                  |                          |      |       |                              |
| 14  | rs8003454    | -0.147        | 0.088      | 0.519     | 0.399     | 3.258 [1.625-4.459]    | 0.004 [0.002-0.006]       | 3.954 [3.564-4.523]     | 0.003 [0.003-0.004]       | 0.229                    | 0.184      | 0.488             | .                                                  | .                            | .          | .     | Height                                            | 0.56          | -0.82          |                                  |                          |      |       |                              |
| 18  | rs371858795  | 5.998         | 0.711      | 0.769     | 0.405     | 6.268 [4.277-7.774]    | 0.004 [0.003-0.005]       | 3.876 [3.254-4.441]     | 0.004 [0.003-0.005]       | 0.229                    | 0.000      | NA                | 124                                                | .                            | .          | .     | Heart rate                                        | 0.39          | 2.10           |                                  |                          |      |       |                              |
| 22  | rs1601558750 | -0.570        | 0.024      | 0.102     | 0.081     | 1.826 [1.044-2.822]    | 0.014 [0.007-0.027]       | 1.918 [1.567-2.219]     | 0.009 [0.006-0.012]       | -0.005                   | 0.000      | NA                | 101                                                | .                            | .          | .     | Forced volume capacity                            | 0.51          | 0.48           |                                  |                          |      |       |                              |

Significant association (log(p-val) < -10.47) with PNG highlanders candidate SNPs or with the closest SNP in a 100bp windows (50 bp up and downstream) in the UK Biobank are given in bold

\*Effective allele is the derived allele. When closest SNP doesn't exist in our papuan dataset, beta is given as absolute value

\*\* association results given for the closest SNP

Table S7: Candidate SNPs driving selection in PNG lowlanders

| CHR | rs id          | XP-EHH<br>SNP | PBS<br>SNP | Daf<br>HL | Daf<br>LL | mean logLR HL<br>95%CI | mean sel coef HL<br>95%CI | mean logLR LL<br>95%CI | mean sel coef LL<br>95%CI | F <sub>ST</sub> HL<br>LL | DAF<br>CHB | DAF EUR<br>(UKBB) | distance to the closest SNP<br>in UKBB (GRCh38) | Top association UK<br>Biobank                           | -LOG(pval)     | Beta*        | Top assoc pheno<br>gemma | pval<br>gemma | Beta<br>gemma* | variant consequences<br>(VEP)                     |
|-----|----------------|---------------|------------|-----------|-----------|------------------------|---------------------------|------------------------|---------------------------|--------------------------|------------|-------------------|-------------------------------------------------|---------------------------------------------------------|----------------|--------------|--------------------------|---------------|----------------|---------------------------------------------------|
| 1   | rs368120563    | -5.482        | 1.059      | 0.872     | 0.380     | 7.739 [5.018-11.948]   | 0.004 [0.003-0.005]       | 5.062 [4.629-5.778]    | 0.01 [0.007-0.013]        | 0.420                    | 0.000      | NA                | 123 .                                           |                                                         |                |              | Height                   | 0.42          | 1.38           | regulatory region variant                         |
| 1   | rs1574154373   | -1.508        | 0.114      | 0.135     | 0.019     | 3.695 [2.285-5.851]    | 0.009 [0.006-0.014]       | 0.961 [0.598-1.335]    | 0.08 [0.055-0.1]          | 0.075                    | 0.000      | NA                | 36 .                                            |                                                         |                |              | Maximal chest depth      | 0.34          | 0.93           | regulatory region variant                         |
| 2   | rs7583123      | 0.457         | -0.148     | 0.486     | 0.630     | 4.806 [2.838-6.068]    | 0.003 [0.003-0.004]       | 2.239 [1.141-3.906]    | 0.003 [0.002-0.004]       | 0.033                    | 0.184      | 0.238             | . .                                             |                                                         |                |              | Heart rate               | 0.24          | -2.44          | .                                                 |
| 2   | chr2:200269472 | NA            | NA         | 0.054     | 0.000     | 3.182 [1.876-4.107]    | 0.023 [0.012-0.037]       | NA                     | NA                        | 0.039                    | 0.000      | NA                | 7 .                                             |                                                         |                |              | Height                   | 0.49          | -3.24          | .                                                 |
| 2   | rs376150658    | NA            | 0.068      | 0.230     | 0.130     | 3.261 [2.435-4.116]    | 0.005 [0.004-0.007]       | 3.685 [2.816-4.669]    | 0.02 [0.014-0.025]        | 0.025                    | 0.000      | NA                | 8 .                                             |                                                         |                |              | Maximal chest depth      | 0.61          | 0.48           | .                                                 |
| 4   | rs4693058      | -3.862        | 0.331      | 0.757     | 0.528     | 6.859 [3.644-9.831]    | 0.004 [0.003-0.005]       | 1.433 [0.219-2.517]    | 0.002 [0.001-0.003]       | 0.103                    | 0.301      | 0.579             | . .                                             | <b>Lymphocyte percentage</b>                            | <b>-36.61</b>  | <b>-0.02</b> | Heart rate               | 0.05          | 3.14           | .                                                 |
| 4   | rs926184421    | NA            | NA         | 0.081     | 0.000     | 2.658 [1.531-4.049]    | 0.013 [0.007-0.020]       | NA                     | NA                        | 0.063                    | 0.000      | NA                | 14 .                                            | <b>Recent restlessness**</b>                            | <b>-11.64</b>  | <b>0.58</b>  | Height                   | 0.66          | -1.17          | .                                                 |
| 5   | rs36003688     | -1.921        | 0.021      | 0.311     | 0.259     | 3.121 [2.018-4.122]    | 0.005 [0.003-0.007]       | 0.644 [0.322-1.168]    | 0.003 [0.002-0.006]       | -0.002                   | 0.078      | 0.016             | . .                                             |                                                         |                |              | Height                   | 0.57          | -0.76          | .                                                 |
| 6   | rs989789809    | 0.049         | 0.067      | 0.142     | 0.056     | 2.412 [1.865-3.108]    | 0.007 [0.005-0.011]       | 1.807 [0.644-3.307]    | 0.044 [0.011-0.081]       | 0.031                    | 0.000      | NA                | 13 .                                            |                                                         |                |              | Heart rate               | 0.33          | 3.73           | .                                                 |
| 7   | rs6950082      | -3.511        | 0.241      | 0.493     | 0.259     | 3.235 [1.787-4.571]    | 0.003 [0.002-0.003]       | 1.522 [1.259-1.834]    | 0.004 [0.003-0.005]       | 0.101                    | 0.155      | NA                | 3 .                                             | <b>Platelet count**</b>                                 | <b>-35.02</b>  | <b>0.03</b>  | Heart rate               | 0.33          | 2.05           | .                                                 |
| 8   | rs187915256    | NA            | NA         | 0.986     | 1.000     | 5.307 [4.467-6.098]    | 0.004 [0.003-0.004]       | 3.637 [2.567-5.14]     | 0.003 [0.003-0.004]       | 0.004                    | 1.000      | NA                | 1 .                                             |                                                         |                |              | Diastolic blood pressure | 0.46          | 18.61          | .                                                 |
| 9   | rs372277219    | 1.214         | NA         | 0.223     | 0.000     | 3.346 [2.654-3.878]    | 0.006 [0.004-0.007]       | NA                     | NA                        | 0.192                    | 0.000      | NA                | 143 .                                           |                                                         |                |              | Height                   | 0.15          | 2.92           | .                                                 |
| 12  | rs75047318     | -3.128        | -0.058     | 0.074     | 0.148     | 2.174 [1.028-3.776]    | 0.015 [0.006-0.026]       | 0.657 [0.172-1.727]    | 0.004 [0.001-0.008]       | 0.021                    | 0.039      | 0.092             | . .                                             | <b>SHBG (sex hormone-<br/>binding globulin)</b>         | <b>-41.26</b>  | <b>-0.04</b> | Maximal chest depth      | 0.11          | 1.20           | regulatory region variant                         |
| 13  | rs537391125    | -4.732        | -0.027     | 0.939     | 0.917     | 6.616 [5.243-7.907]    | 0.011 [0.008-0.013]       | 2.202 [1.471-3.269]    | 0.028 [0.018-0.043]       | -0.004                   | 1.000      | NA                | 81 .                                            |                                                         |                |              | Maximal chest depth      | 0.11          | -1.15          | .                                                 |
| 13  | rs72634302     | -2.033        | 0.331      | 0.480     | 0.167     | 5.727 [4.642-6.55]     | 0.004 [0.003-0.005]       | 0.757 [0.552-0.88]     | 0.003 [0.002-0.004]       | 0.188                    | 0.209      | 0.200             | . .                                             |                                                         |                |              | Forced volume capacity   | 0.51          | -0.28          | .                                                 |
| 14  | rs1594377001   | -4.031        | -0.044     | 0.054     | 0.111     | 2.698 [1.602-4.102]    | 0.021 [0.01-0.033]        | 2.351 [1.899-3.04]     | 0.015 [0.01-0.022]        | 0.014                    | 0.000      | NA                | 27 .                                            |                                                         |                |              | Height                   | 0.66          | 0.91           | 5 prime UTR variant,<br>regulatory region variant |
| 14  | rs12885954     | -0.330        | 0.096      | 0.574     | 0.463     | 4.141 [2.343-5.846]    | 0.003 [0.002-0.003]       | 2.82 [1.653-3.484]     | 0.004 [0.002-0.005]       | 0.017                    | 0.602      | 0.076             | . .                                             |                                                         |                |              | Peak expiratory flow     | 0.38          | 1.05           | .                                                 |
| 16  | rs2287123      | -0.691        | 0.109      | 0.318     | 0.139     | 2.118 [0.709-4.201]    | 0.002 [0.001-0.004]       | 0.445 [0.316-0.553]    | 0.002 [0.002-0.003]       | 0.076                    | 0.175      | 0.041             | . .                                             | <b>Noninflammatory<br/>female genital<br/>disorders</b> | <b>-12.05</b>  | <b>-0.14</b> | Diastolic blood pressure | 0.18          | -5.31          | .                                                 |
| 17  | rs575590765    | -2.250        | -0.077     | 0.115     | 0.204     | 3.021 [1.932-4.716]    | 0.01 [0.006-0.017]        | 2.134 [1.85-2.54]      | 0.008 [0.006-0.01]        | 0.022                    | 0.000      | NA                | 78 .                                            |                                                         |                |              | Diastolic blood pressure | 0.59          | -3.24          | .                                                 |
| 18  | rs2848745      | -3.279        | 0.584      | 0.946     | 0.778     | 2.694 [2.007-3.345]    | 0.003 [0.003-0.004]       | 0.315 [0.004-0.642]    | -0.001 [-0.002-0]         | 0.114                    | 0.578      | 0.528             | . .                                             |                                                         |                |              | Height                   | 0.46          | 1.56           | .                                                 |
| 19  | rs900717974    | -1.205        | 0.020      | 0.108     | 0.065     | 3.06 [2.255-3.748]     | 0.011 [0.007-0.014]       | 1.414 [0.588-2.623]    | 0.02 [0.009-0.037]        | 0.003                    | 0.000      | NA                | 32 .                                            |                                                         |                |              | Diastolic blood pressure | 0.46          | -6.08          | .                                                 |
| 19  | rs1870071      | -2.788        | 0.250      | 0.757     | 0.417     | 3.506 [1.526-5.688]    | 0.003 [0.002-0.004]       | 0.535 [0.009-1.272]    | 0.001 [0-0.002]           | 0.210                    | 0.597      | 0.689             | . .                                             | <b>Lymphocyte count</b>                                 | <b>-471.30</b> | <b>-0.09</b> | Height                   | 0.34          | 1.47           | regulatory region variant                         |
| 19  | rs1600734199   | -0.044        | 0.041      | 0.128     | 0.065     | 2.827 [1.828-4.332]    | 0.01 [0.006-0.016]        | 0.978 [0.433-1.717]    | 0.012 [0.005-0.023]       | 0.014                    | 0.000      | NA                | 90 .                                            |                                                         |                |              | Diastolic blood pressure | 0.46          | -5.02          | regulatory region variant                         |

Significant association (log(p-val) < -10.47) with PNG lowlanders candidate SNPs or with the closest SNP in a 100bp windows (50 bp up and downstream) in the UK Biobank are given in bold

\*Effective allele is the derived allele. When closest SNP doesn't exist in our papuan dataset, beta is given as absolute value

\*\* association results given for the closest SNP

Table S8: mean log LR after 50 CLUES run for the 5 top SNPs in the regions under selection in PNG highlanders

Source data are provided as a Source Data file

| Region of interest               | CHR | BP GRCh38        | mean logLR DAF (PNG) |              | Region of interest               | CHR | BP GRCh38        | mean logLR DAF (PNG) |              |
|----------------------------------|-----|------------------|----------------------|--------------|----------------------------------|-----|------------------|----------------------|--------------|
|                                  |     |                  | after 50 runs        | highlanders) |                                  |     |                  | after 50 runs        | highlanders) |
| <b>chr1:95529290-95736826</b>    | 1   | <b>95547804</b>  | 5.257                | 0.546        | <b>chr12:6452552-6662260</b>     | 12  | <b>6505015</b>   | 4.142                | 0.713        |
|                                  | 1   | 95579291         | 3.834                | 0.676        |                                  | 12  | 6516544          | 3.465                | 0.056        |
|                                  | 1   | 95567984         | 3.252                | 0.556        |                                  | 12  | 6479999          | 2.894                | 0.296        |
|                                  | 1   | 95650657         | 2.945                | 0.657        |                                  | 12  | 6648538          | 2.845                | 0.713        |
|                                  | 1   | 95643171         | 2.464                | 0.324        |                                  | 12  | 6502789          | 2.479                | 0.722        |
| <b>chr2:151012094-151201575</b>  | 2   | <b>151194524</b> | 2.804                | 0.917        | <b>chr12:9886812-10055333</b>    | 12  | <b>9979340</b>   | 4.263                | 0.907        |
|                                  | 2   | 151166392        | 2.584                | 0.917        |                                  | 12  | 10010984         | 3.641                | 0.824        |
|                                  | 2   | 151154513        | 1.879                | 0.102        |                                  | 12  | 9983698          | 3.096                | 0.917        |
|                                  | 2   | 151062188        | 1.740                | 0.167        |                                  | 12  | 10023006         | 2.686                | 0.954        |
|                                  | 2   | 151166811        | 1.318                | 0.056        |                                  | 12  | 9977095          | 2.443                | 0.907        |
| <b>chr3:13010340-13217789</b>    | 3   | <b>13035177</b>  | 5.889                | 0.407        | <b>chr12:58391529-58634980</b>   | 12  | <b>58569336</b>  | 6.624                | 0.704        |
|                                  | 3   | 13165457         | 5.274                | 0.731        |                                  | 12  | 58451248         | 4.934                | 0.815        |
|                                  | 3   | 13132090         | 5.224                | 0.704        |                                  | 12  | 58582254         | 3.961                | 0.157        |
|                                  | 3   | 13172682         | 5.138                | 0.602        |                                  | 12  | 58541863         | 3.443                | 0.824        |
|                                  | 3   | 13044657         | 4.515                | 0.583        |                                  | 12  | 58561387         | 2.135                | 0.806        |
| <b>chr3:61779523-62009858</b>    | 3   | <b>61949161</b>  | 5.672                | 0.769        | <b>chr12:103783315-104121479</b> | 12  | <b>103794720</b> | 8.483                | 0.472        |
|                                  | 3   | 61946137         | 5.514                | 0.778        |                                  | 12  | 103989218        | 6.641                | 0.731        |
|                                  | 3   | 61819606         | 4.763                | 0.120        |                                  | 12  | 103903509        | 6.640                | 0.704        |
|                                  | 3   | 61852692         | 3.097                | 0.852        |                                  | 12  | 103914824        | 6.576                | 0.722        |
|                                  | 3   | 61846686         | 2.541                | 0.852        |                                  | 12  | 103827796        | 6.544                | 0.620        |
| <b>chr4:110182324-110384099</b>  | 4   | <b>110291463</b> | 4.584                | 0.417        | <b>chr13:47639988-47825193</b>   | 13  | <b>47662268</b>  | 4.065                | 0.194        |
|                                  | 4   | 110232325        | 3.915                | 0.676        |                                  | 13  | 47825176         | 3.365                | 0.148        |
|                                  | 4   | 110320193        | 2.750                | 0.769        |                                  | 13  | 47703856         | 3.345                | 0.370        |
|                                  | 4   | 110264462        | 2.370                | 0.731        |                                  | 13  | 47803405         | 2.863                | 0.574        |
|                                  | 4   | 110296751        | 2.363                | 0.759        |                                  | 13  | 47753020         | 2.076                | 0.565        |
| <b>chr4:152704503-152970509</b>  | 4   | <b>152954793</b> | 4.185                | 0.593        | <b>chr13:104734734-104875020</b> | 13  | <b>104870821</b> | 4.696                | 0.500        |
|                                  | 4   | 152795365        | 3.876                | 0.759        |                                  | 13  | 104768188        | 4.250                | 0.519        |
|                                  | 4   | 152716551        | 3.534                | 0.685        |                                  | 13  | 104786510        | 2.400                | 0.611        |
|                                  | 4   | 152910966        | 2.055                | 0.593        |                                  | 13  | 104824094        | 2.379                | 0.620        |
|                                  | 4   | 152908101        | 1.767                | 0.139        |                                  | 13  | 104787393        | 2.236                | 0.657        |
| <b>chr6:30916070-31153184</b>    | 6   | <b>31000120</b>  | 7.149                | 0.611        | <b>chr14:60157772-60377317</b>   | 14  | <b>60160438</b>  | 3.535                | 0.324        |
|                                  | 6   | 31035407         | 4.267                | 0.519        |                                  | 14  | 60158288         | 2.349                | 0.139        |
|                                  | 6   | 30983781         | 4.189                | 0.630        |                                  | 14  | 60352132         | 2.027                | 0.398        |
|                                  | 6   | 30985432         | 4.065                | 0.611        |                                  | 14  | 60354491         | 2.018                | 0.398        |
|                                  | 6   | 31073503         | 3.192                | 0.565        |                                  | 14  | 60331291         | 1.871                | 0.731        |
| <b>chr6:33006055-33132312</b>    | 6   | <b>33131649</b>  | 3.243                | 0.213        | <b>chr14:92230479-92401520</b>   | 14  | <b>92251093</b>  | 3.258                | 0.519        |
|                                  | 6   | 33093558         | 3.159                | 0.306        |                                  | 14  | 92248897         | 3.119                | 0.065        |
|                                  | 6   | 33128978         | 2.568                | 0.639        |                                  | 14  | 92273678         | 2.643                | 0.435        |
|                                  | 6   | 33104062         | 2.226                | 0.315        |                                  | 14  | 92389176         | 2.629                | 0.741        |
|                                  | 6   | 33107186         | 1.963                | 0.417        |                                  | 14  | 92239129         | 1.629                | 0.130        |
| <b>chr7:147590904-147718219</b>  | 7   | <b>147610112</b> | 3.892                | 0.519        | <b>chr18:4072997-4251153</b>     | 18  | <b>4162760</b>   | 6.268                | 0.769        |
|                                  | 7   | 147683897        | 3.026                | 0.241        |                                  | 18  | 4181004          | 5.063                | 0.759        |
|                                  | 7   | 147662601        | 2.998                | 0.639        |                                  | 18  | 4180103          | 4.955                | 0.741        |
|                                  | 7   | 147612922        | 2.450                | 0.509        |                                  | 18  | 4088952          | 3.812                | 0.352        |
|                                  | 7   | 147606714        | 1.952                | 0.231        |                                  | 18  | 4152970          | 3.450                | 0.120        |
| <b>chr9:85458922-85745092</b>    | 9   | <b>85560644</b>  | 5.119                | 0.685        | <b>chr22:45519818-45644906</b>   | 22  | <b>45617645</b>  | 1.826                | 0.102        |
|                                  | 9   | 85479140         | 4.466                | 0.824        |                                  | 22  | 45536399         | 1.752                | 0.306        |
|                                  | 9   | 85688522         | 3.359                | 0.120        |                                  | 22  | 45637445         | 1.651                | 0.148        |
|                                  | 9   | 85636728         | 3.301                | 0.694        |                                  | 22  | 45634845         | 1.452                | 0.056        |
|                                  | 9   | 85640367         | 3.208                | 0.685        |                                  | 22  | 45610910         | 1.111                | 0.315        |
| <b>chr10:131112245-131235951</b> | 10  | <b>131130644</b> | 3.169                | 0.426        |                                  |     |                  |                      |              |
|                                  | 10  | 131131893        | 3.050                | 0.426        |                                  |     |                  |                      |              |
|                                  | 10  | 131140940        | 2.049                | 0.380        |                                  |     |                  |                      |              |
|                                  | 10  | 131160615        | 1.862                | 0.491        |                                  |     |                  |                      |              |
|                                  | 10  | 131171199        | 1.837                | 0.954        |                                  |     |                  |                      |              |

The candidate SNPs we considered the most likely to drive selection and that we will consider for the association analysis are in bold

Table S9: mean log LR after 50 CLUES run for the 5 top SNPs in the regions under selection in PNG lowlanders  
Source data are provided as a Source Data file

| Region of interest              | CHR      | BP               | GRCh38 | mean logLR | DAF (PNG) | Region of interest               | CHR       | BP               | GRCh38 | mean logLR | DAF (PNG) |
|---------------------------------|----------|------------------|--------|------------|-----------|----------------------------------|-----------|------------------|--------|------------|-----------|
| <b>chr1:88800562-89326878</b>   | <b>1</b> | <b>89127023</b>  |        | 7.739      | 0.872     | <b>chr12:120353731-120666335</b> | <b>12</b> | <b>120431276</b> |        | 2.174      | 0.074     |
|                                 | <b>1</b> | <b>89175641</b>  |        | 7.106      | 0.561     |                                  | <b>12</b> | <b>120639163</b> |        | 1.951      | 0.831     |
|                                 | <b>1</b> | <b>89040215</b>  |        | 4.856      | 0.291     |                                  | <b>12</b> | <b>120638240</b> |        | 1.579      | 0.838     |
|                                 | <b>1</b> | <b>88915275</b>  |        | 4.215      | 0.818     |                                  | <b>12</b> | <b>120639705</b> |        | 1.527      | 0.831     |
|                                 | <b>1</b> | <b>89109691</b>  |        | 1.671      | 0.824     |                                  | <b>12</b> | <b>120611132</b> |        | 1.396      | 0.122     |
| <b>chr1:237827847-237992467</b> | <b>1</b> | <b>237859017</b> |        | 3.695      | 0.135     | <b>chr13:61590770-61993327</b>   | <b>13</b> | <b>61791792</b>  |        | 6.616      | 0.939     |
|                                 | <b>1</b> | <b>237843735</b> |        | 3.476      | 0.304     |                                  | <b>13</b> | <b>61947329</b>  |        | 4.363      | 0.480     |
|                                 | <b>1</b> | <b>237967252</b> |        | 2.440      | 0.155     |                                  | <b>13</b> | <b>61937190</b>  |        | 4.356      | 0.486     |
|                                 | <b>1</b> | <b>237865965</b> |        | 1.997      | 0.358     |                                  | <b>13</b> | <b>61727719</b>  |        | 4.037      | 0.101     |
|                                 | <b>1</b> | <b>237872490</b> |        | 1.743      | 0.149     |                                  | <b>13</b> | <b>61692897</b>  |        | 3.685      | 0.095     |
| <b>chr2:124085628-124249405</b> | <b>2</b> | <b>124228148</b> |        | 4.806      | 0.486     | <b>chr13:89660867-89920623</b>   | <b>13</b> | <b>89848283</b>  |        | 5.727      | 0.480     |
|                                 | <b>2</b> | <b>124117978</b> |        | 4.013      | 0.561     |                                  | <b>13</b> | <b>89858302</b>  |        | 4.250      | 0.541     |
|                                 | <b>2</b> | <b>124233560</b> |        | 3.011      | 0.432     |                                  | <b>13</b> | <b>89851426</b>  |        | 3.440      | 0.520     |
|                                 | <b>2</b> | <b>124232181</b> |        | 2.988      | 0.426     |                                  | <b>13</b> | <b>89712047</b>  |        | 2.779      | 0.736     |
|                                 | <b>2</b> | <b>124206789</b> |        | 2.227      | 0.061     |                                  | <b>13</b> | <b>89661705</b>  |        | 2.222      | 0.088     |
| <b>chr2:200238798-200432145</b> | <b>2</b> | <b>200269472</b> |        | 3.182      | 0.054     | <b>chr14:37137933-37382802</b>   | <b>14</b> | <b>37197894</b>  |        | 2.698      | 0.054     |
|                                 | <b>2</b> | <b>200300024</b> |        | 3.039      | 0.980     |                                  | <b>14</b> | <b>37159526</b>  |        | 2.343      | 0.061     |
|                                 | <b>2</b> | <b>200383471</b> |        | 2.483      | 0.054     |                                  | <b>14</b> | <b>37371863</b>  |        | 1.910      | 0.054     |
|                                 | <b>2</b> | <b>200321849</b> |        | 2.315      | 0.865     |                                  | <b>14</b> | <b>37299777</b>  |        | 1.682      | 0.122     |
|                                 | <b>2</b> | <b>200325905</b> |        | 2.161      | 0.331     |                                  | <b>14</b> | <b>37293216</b>  |        | 0.885      | 0.061     |
| <b>chr2:241759136-242088831</b> | <b>2</b> | <b>241862387</b> |        | 3.261      | 0.230     | <b>chr14:77312867-77558267</b>   | <b>14</b> | <b>77524491</b>  |        | 4.141      | 0.574     |
|                                 | <b>2</b> | <b>241778517</b> |        | 2.284      | 0.291     |                                  | <b>14</b> | <b>77495559</b>  |        | 3.054      | 0.250     |
|                                 | <b>2</b> | <b>241815140</b> |        | 1.546      | 0.101     |                                  | <b>14</b> | <b>77508975</b>  |        | 2.825      | 0.149     |
|                                 | <b>2</b> | <b>241764015</b> |        | 1.519      | 0.615     |                                  | <b>14</b> | <b>77520582</b>  |        | 2.496      | 0.155     |
|                                 | <b>2</b> | <b>241822219</b> |        | 1.162      | 0.216     |                                  | <b>14</b> | <b>77366205</b>  |        | 1.772      | 0.135     |
| <b>chr4:171791098-171986729</b> | <b>4</b> | <b>171895323</b> |        | 2.658      | 0.081     | <b>chr16:87806834-87928392</b>   | <b>16</b> | <b>87839137</b>  |        | 2.118      | 0.318     |
|                                 | <b>4</b> | <b>171841157</b> |        | 2.316      | 0.061     |                                  | <b>16</b> | <b>87811366</b>  |        | 2.088      | 0.182     |
|                                 | <b>4</b> | <b>171911456</b> |        | 2.231      | 0.095     |                                  | <b>16</b> | <b>87855597</b>  |        | 1.603      | 0.399     |
|                                 | <b>4</b> | <b>171950025</b> |        | 2.098      | 0.135     |                                  | <b>16</b> | <b>87824639</b>  |        | 1.455      | 0.520     |
|                                 | <b>4</b> | <b>171967368</b> |        | 1.663      | 0.149     |                                  | <b>16</b> | <b>87869733</b>  |        | 0.873      | 0.223     |
| <b>chr4:82750503-83146792</b>   | <b>4</b> | <b>82856713</b>  |        | 6.859      | 0.757     | <b>chr17:54003406-54222843</b>   | <b>17</b> | <b>54041157</b>  |        | 3.021      | 0.115     |
|                                 | <b>4</b> | <b>83036465</b>  |        | 2.414      | 0.824     |                                  | <b>17</b> | <b>54097704</b>  |        | 2.696      | 0.284     |
|                                 | <b>4</b> | <b>82816546</b>  |        | 2.160      | 0.074     |                                  | <b>17</b> | <b>54062441</b>  |        | 2.539      | 0.912     |
|                                 | <b>4</b> | <b>83116141</b>  |        | 1.806      | 0.419     |                                  | <b>17</b> | <b>54138655</b>  |        | 2.452      | 0.284     |
|                                 | <b>4</b> | <b>82861781</b>  |        | 1.258      | 0.054     |                                  | <b>17</b> | <b>54073758</b>  |        | 2.168      | 0.061     |
| <b>chr5:65504470-65708617</b>   | <b>5</b> | <b>65534488</b>  |        | 3.121      | 0.311     | <b>chr18:41133289-41618597</b>   | <b>18</b> | <b>41477761</b>  |        | 2.694      | 0.946     |
|                                 | <b>5</b> | <b>65540191</b>  |        | 3.018      | 0.054     |                                  | <b>18</b> | <b>41319199</b>  |        | 2.283      | 0.189     |
|                                 | <b>5</b> | <b>65619024</b>  |        | 2.718      | 0.088     |                                  | <b>18</b> | <b>41416329</b>  |        | 1.938      | 0.223     |
|                                 | <b>5</b> | <b>65682263</b>  |        | 2.036      | 0.068     |                                  | <b>18</b> | <b>41580340</b>  |        | 1.913      | 0.703     |
|                                 | <b>5</b> | <b>65560665</b>  |        | 1.769      | 0.338     |                                  | <b>18</b> | <b>41361038</b>  |        | 1.669      | 0.196     |
| <b>chr6:85266477-85483888</b>   | <b>6</b> | <b>85351595</b>  |        | 2.412      | 0.142     | <b>chr19:11708670-12108034</b>   | <b>19</b> | <b>12067828</b>  |        | 3.060      | 0.108     |
|                                 | <b>6</b> | <b>85328394</b>  |        | 2.254      | 0.074     |                                  | <b>19</b> | <b>11759746</b>  |        | 2.945      | 0.959     |
|                                 | <b>6</b> | <b>85273167</b>  |        | 1.682      | 0.250     |                                  | <b>19</b> | <b>11989871</b>  |        | 2.536      | 0.061     |
|                                 | <b>6</b> | <b>85277286</b>  |        | 1.615      | 0.581     |                                  | <b>19</b> | <b>11993862</b>  |        | 2.503      | 0.108     |
|                                 | <b>6</b> | <b>85361286</b>  |        | 1.209      | 0.236     |                                  | <b>19</b> | <b>12027280</b>  |        | 2.436      | 0.081     |
| <b>chr7:129548370-129836070</b> | <b>7</b> | <b>129637870</b> |        | 3.235      | 0.493     | <b>chr19:16344294-16576199</b>   | <b>19</b> | <b>16394295</b>  |        | 3.506      | 0.757     |
|                                 | <b>7</b> | <b>129637875</b> |        | 2.650      | 0.162     |                                  | <b>19</b> | <b>16385981</b>  |        | 3.287      | 0.757     |
|                                 | <b>7</b> | <b>129673855</b> |        | 2.586      | 0.777     |                                  | <b>19</b> | <b>16361060</b>  |        | 3.256      | 0.743     |
|                                 | <b>7</b> | <b>129672730</b> |        | 1.985      | 0.818     |                                  | <b>19</b> | <b>16555290</b>  |        | 2.052      | 0.791     |
|                                 | <b>7</b> | <b>129754564</b> |        | 1.698      | 0.108     |                                  | <b>19</b> | <b>16401701</b>  |        | 2.046      | 0.142     |
| <b>chr8:133791891-133962825</b> | <b>8</b> | <b>133959118</b> |        | 5.307      | 0.986     | <b>chr19:54176104-54330609</b>   | <b>19</b> | <b>54200712</b>  |        | 2.827      | 0.128     |
|                                 | <b>8</b> | <b>133793941</b> |        | 2.436      | 0.588     |                                  | <b>19</b> | <b>54204288</b>  |        | 1.591      | 0.872     |
|                                 | <b>8</b> | <b>133826446</b> |        | 1.123      | 0.581     |                                  | <b>19</b> | <b>54189013</b>  |        | 1.591      | 0.628     |
|                                 | <b>8</b> | <b>133839210</b> |        | 1.013      | 0.554     |                                  | <b>19</b> | <b>54283564</b>  |        | 1.545      | 0.331     |
|                                 | <b>8</b> | <b>133805132</b> |        | 0.601      | 0.054     |                                  | <b>19</b> | <b>54196804</b>  |        | 0.682      | 0.149     |
| <b>chr9:93717217-93877803</b>   | <b>9</b> | <b>93845307</b>  |        | 3.346      | 0.223     |                                  |           |                  |        |            |           |
|                                 | <b>9</b> | <b>93852030</b>  |        | 3.241      | 0.682     |                                  |           |                  |        |            |           |
|                                 | <b>9</b> | <b>93782635</b>  |        | 3.086      | 0.723     |                                  |           |                  |        |            |           |
|                                 | <b>9</b> | <b>93847325</b>  |        | 2.823      | 0.682     |                                  |           |                  |        |            |           |
|                                 | <b>9</b> | <b>93853581</b>  |        | 2.697      | 0.696     |                                  |           |                  |        |            |           |

The candidate SNPs we considered the most likely to drive selection and that we will consider for the association analysis are in bold

**Table S10: Significant association (log(p-val) < -10.47) with PNG highlanders candidate SNPs in the UK Biobank**

P-values and betas have been extracted from UK Biobank summary statistics (Pan-UKB team. <https://pan.ukbb.broadinstitute.org> (2020)).

|                   | Phenotype                                | Phenotype description                                                   | -LOG(p_val)   | beta*         |
|-------------------|------------------------------------------|-------------------------------------------------------------------------|---------------|---------------|
| <b>rs9277772</b>  | <b>categorical-20002-both_sexes-1226</b> | <b>Non-cancer illness code, self-reported: hypothyroidism/myxoedema</b> | <b>-124.4</b> | <b>0.2369</b> |
|                   | categorical-20003-both_sexes-1141191044  | Treatment/medication code: levothyroxine sodium                         | -70.34        | 0.1882        |
|                   | phecode-244.4-both_sexes                 | Hypothyroidism NOS                                                      | -62.88        | 0.1755        |
|                   | icd10-E03-both_sexes                     | E03 Other hypothyroidism                                                | -62.28        | 0.1741        |
|                   | phecode-244-both_sexes                   | Hypothyroidism                                                          | -59.9         | 0.1669        |
|                   | continuous-50-both_sexes-irnt            | Standing height                                                         | -50.05        | 0.02655       |
|                   | prescriptions-levothyroxine-both_sexes   | Prescriptions levothyroxine                                             | -34.49        | 0.1412        |
|                   | prescriptions-thyroid_hormone-both_sexes | Prescriptions thyroid hormone                                           | -34.49        | 0.1412        |
|                   | continuous-20015-both_sexes-irnt         | Sitting height                                                          | -34.24        | 0.02357       |
|                   | continuous-23129-both_sexes-irnt         | Trunk fat-free mass                                                     | -28.3         | 0.01658       |
|                   | continuous-23130-both_sexes-irnt         | Trunk predicted mass                                                    | -27.9         | 0.01625       |
|                   | continuous-51-both_sexes-irnt            | Seated height                                                           | -27.73        | 0.01998       |
|                   | continuous-23125-both_sexes-irnt         | Arm fat-free mass (left)                                                | -26.44        | 0.01582       |
|                   | continuous-23101-both_sexes-irnt         | Whole body fat-free mass                                                | -26.35        | 0.01586       |
|                   | continuous-23126-both_sexes-irnt         | Arm predicted mass (left)                                               | -26.26        | 0.01572       |
|                   | continuous-23102-both_sexes-irnt         | Whole body water mass                                                   | -24.88        | 0.0153        |
|                   | continuous-23105-both_sexes-irnt         | Basal metabolic rate                                                    | -24.54        | 0.01597       |
|                   | continuous-1697-both_sexes               | Comparative height size at age 10                                       | -23.62        | 0.01612       |
|                   | continuous-23121-both_sexes-irnt         | Arm fat-free mass (right)                                               | -23.47        | 0.01466       |
|                   | continuous-23122-both_sexes-irnt         | Arm predicted mass (right)                                              | -22.29        | 0.01412       |
|                   | continuous-23114-both_sexes-irnt         | Leg predicted mass (right)                                              | -18.94        | 0.01347       |
|                   | continuous-30150-both_sexes-irnt         | <b>Eosinophil count</b>                                                 | -18.76        | 0.02042       |
|                   | continuous-23113-both_sexes-irnt         | Leg fat-free mass (right)                                               | -18.65        | 0.01338       |
|                   | continuous-23117-both_sexes-irnt         | Leg fat-free mass (left)                                                | -17.96        | 0.01337       |
|                   | categorical-6159-both_sexes-7            | Pain type(s) experienced in last month: knee pain                       | -17.46        | 0.04276       |
|                   | continuous-23118-both_sexes-irnt         | Leg predicted mass (left)                                               | -16.83        | 0.0126        |
|                   | continuous-21002-both_sexes-irnt         | Weight                                                                  | -16.79        | 0.01715       |
|                   | continuous-49-both_sexes-irnt            | Hip circumference                                                       | -16.59        | 0.01912       |
|                   | continuous-23098-both_sexes-irnt         | Weight                                                                  | -15.64        | 0.01647       |
|                   | biomarkers-30720-both_sexes-irnt         | Cystatin C                                                              | -15.56        | -0.01763      |
|                   | continuous-30210-both_sexes-irnt         | <b>Eosinophil percentage</b>                                            | -15.28        | 0.01827       |
|                   | continuous-NAP-both_sexes-irnt           | Non-albumin protein                                                     | -15.25        | -0.01867      |
|                   | continuous-102-both_sexes-irnt           | Pulse rate, automated reading                                           | -15.03        | -0.01787      |
|                   | continuous-30100-both_sexes-irnt         | <b>Mean platelet (thrombocyte) volume</b>                               | -14.98        | 0.01979       |
|                   | continuous-30070-both_sexes-irnt         | <b>Red blood cell (erythrocyte) distribution width</b>                  | -14.07        | 0.01722       |
|                   | phecode-495-both_sexes                   | Asthma                                                                  | -13.18        | 0.0578        |
|                   | categorical-20107-both_sexes-3           | Illnesses of father: lung cancer                                        | -12.71        | 0.05301       |
|                   | continuous-30010-both_sexes-irnt         | <b>Red blood cell (erythrocyte) count</b>                               | -12.71        | -0.01399      |
|                   | icd10-J45-both_sexes                     | J45 Asthma                                                              | -12.71        | 0.05623       |
|                   | categorical-2492-both_sexes-2492         | Taking other prescription medications                                   | -12.26        | 0.02967       |
|                   | biomarkers-30860-both_sexes-irnt         | Total protein                                                           | -12.18        | -0.01616      |
|                   | continuous-1737-both_sexes               | Childhood sunburn occasions                                             | -11.87        | -0.015        |
|                   | continuous-20153-both_sexes-irnt         | Forced expiratory volume in 1-second (FEV1), predicted                  | -11.39        | 0.009274      |
|                   | categorical-20107-both_sexes-101         | Illnesses of father                                                     | -11.37        | -0.03292      |
|                   | continuous-30090-both_sexes-irnt         | <b>Platelet crit</b>                                                    | -11.3         | 0.0155        |
|                   | biomarkers-30630-both_sexes-irnt         | Apolipoprotein A                                                        | -11           | 0.01497       |
|                   | continuous-AG-both_sexes-irnt            | Albumin/Globulin ratio                                                  | -10.74        | 0.0152        |
|                   | biomarkers-30760-both_sexes-irnt         | HDL cholesterol                                                         | -10.7         | 0.01497       |
| <b>rs74576183</b> | continuous-30010-both_sexes-irnt         | <b>Red blood cell (erythrocyte) count</b>                               | -11.74        | 0.04942       |
|                   | continuous-30020-both_sexes-irnt         | <b>Haemoglobin concentration</b>                                        | -10.97        | 0.04307       |

\*effective allele is the derived allele that is under positive selection

Phenotypes from the "Blood count" category 100081 of the UKBB are shown in bold

**Table S11: Significant association (log(p-val) < -10.47) with PNG lowlanders candidate SNPs in the UK Biobank**  
P-values and betas have been extracted from UK Biobank summary statistics (Pan-UKB team. <https://pan.ukbb.broadinstitute.org> (2020)).

|                   | Phenotype                                   | Phenotype description                                                                  | -LOG(p_val) | beta*     |
|-------------------|---------------------------------------------|----------------------------------------------------------------------------------------|-------------|-----------|
| <b>rs4693058</b>  | continuous-30180-both_sexes-irnt            | <b>Lymphocyte percentage</b>                                                           | -36.61      | -0.02079  |
|                   | continuous-30200-both_sexes-irnt            | <b>Neutrophil percentage</b>                                                           | -29.54      | 0.01871   |
|                   | continuous-30120-both_sexes-irnt            | <b>Lymphocyte count</b>                                                                | -27.08      | -0.01837  |
|                   | continuous-30070-both_sexes-irnt            | <b>Red blood cell (erythrocyte) distribution width</b>                                 | -20.23      | 0.0155    |
|                   | biomarkers-30630-both_sexes-irnt            | Apolipoprotein A                                                                       | -11.76      | 0.01146   |
|                   | biomarkers-30760-both_sexes-irnt            | HDL cholesterol                                                                        | -11.13      | 0.01129   |
| <b>rs75047318</b> | biomarkers-30830-both_sexes-irnt            | SHBG                                                                                   | -41.26      | -0.03747  |
|                   | continuous-50-both_sexes-irnt               | Standing height                                                                        | -19.15      | -0.02032  |
|                   | continuous-20151-both_sexes-irnt            | Forced vital capacity (FVC), Best measure                                              | -17.95      | -0.01706  |
|                   | continuous-LDLC-both_sexes-medadj_irnt      | LDL direct, adjusted by medication                                                     | -14.97      | 0.02284   |
|                   | continuous-3062-both_sexes-irnt             | Forced vital capacity (FVC)                                                            | -14.79      | -0.01414  |
|                   | continuous-eGFR-both_sexes-irnt             | Estimated glomerular filtration rate, serum creatinine                                 | -14.79      | 0.01923   |
|                   | biomarkers-30610-both_sexes-irnt            | Alkaline phosphatase                                                                   | -13.59      | 0.02217   |
|                   | continuous-1180-both_sexes                  | Morning/evening person (chronotype)                                                    | -13.42      | 0.01989   |
|                   | continuous-LDLC-both_sexes-medadj_raw       | LDL direct, adjusted by medication                                                     | -13.04      | 0.01835   |
|                   | continuous-20150-both_sexes-irnt            | Forced expiratory volume in 1-second (FEV1), Best measure                              | -12.6       | -0.01444  |
|                   | biomarkers-30700-both_sexes-irnt            | Creatinine                                                                             | -11.3       | -0.01583  |
|                   | biomarkers-30870-both_sexes-irnt            | Triglycerides                                                                          | -11.13      | 0.01903   |
|                   | biomarkers-30680-both_sexes-irnt            | Calcium                                                                                | -10.96      | 0.01906   |
|                   | continuous-30020-both_sexes-irnt            | <b>Haemoglobin concentration</b>                                                       | -10.51      | 0.01451   |
| <b>rs2287123</b>  | phecode-619-females                         | Noninflammatory female genital disorders                                               | -12.05      | -0.1362   |
| <b>rs1870071</b>  | continuous-30120-both_sexes-irnt            | <b>Lymphocyte_count</b>                                                                | -471.3      | -0.08507  |
|                   | continuous-30180-both_sexes-irnt            | <b>Lymphocyte_percentage</b>                                                           | -280.3      | -0.06315  |
|                   | continuous-30200-both_sexes-irnt            | <b>Neutrophil_percentage</b>                                                           | -174.1      | 0.05      |
|                   | continuous-30000-both_sexes-irnt            | <b>White_blood_cell_(leukocyte)_count</b>                                              | -103.5      | -0.03304  |
|                   | continuous-NAP-both_sexes-irnt              | Non-albumin_protein                                                                    | -43.19      | -0.02571  |
|                   | continuous-AG-both_sexes-irnt               | Albumin/Globulin_ratio                                                                 | -34.46      | 0.02262   |
|                   | continuous-30190-both_sexes-irnt            | <b>Monocyte_percentage</b>                                                             | -33.77      | 0.02164   |
|                   | biomarkers-30860-both_sexes-irnt            | Total_protein                                                                          | -30.31      | -0.02093  |
|                   | categorical-6149-both_sexes-1: mouth ulcers | Mouth/teeth_dental_problems                                                            | -16.31      | -0.04353  |
|                   | continuous-30160-both_sexes                 | <b>Basophil_count</b>                                                                  | -13.63      | -0.009662 |
|                   | continuous-30040-both_sexes-irnt            | <b>Mean_corpuscular_volume</b>                                                         | -12.84      | -0.0131   |
|                   | categorical-6152-both_sexes-100             | Blood_clot_DVT_bronchitis_emphysema_asthma_rhinitis_eczema_allergy_diagnosed_by_doctor | -12.13      | -0.02543  |
|                   | prescriptions-atorvastatin-both_sexes       | prescription atorvastatin                                                              | -10.58      | -0.04032  |

\*effective allele is the derived allele that is under positive selection  
Phenotypes from the "Blood count" category 100081 of the UKBB are shown in bold



**Table S12: Significant association ( $\log(p\text{-val}) < -10.47$ ) with the closest SNP to PNG lowlanders candidate SNPs (50 bp upstream and downstream) in the UK Biobank**  
P-values and betas have been extracted from UK Biobank summary statistics (Pan-UKB team. <https://pan.ukbb.broadinstitute.org> (2020)).

|                                                 | Phenotype                        | Phenotype description                     | $-\log(p\text{-val})$ | beta  |
|-------------------------------------------------|----------------------------------|-------------------------------------------|-----------------------|-------|
| <b>rs116353753</b> (closest SNP to rs926184421) | continuous-20516-both_sexes      | Recent restlessness                       | -11.64                | 0.583 |
| <b>rs6968168</b> (closest SNP to rs6950082)     | continuous-30080-both_sexes-irnt | <b>Platelet count</b>                     | -35.02                | 0.03  |
|                                                 | continuous-30090-both_sexes-irnt | <b>Platelet crit</b>                      | -23.32                | 0.02  |
|                                                 | continuous-30100-both_sexes-irnt | <b>Mean platelet (thrombocyte) volume</b> | -14.17                | 0.02  |
|                                                 | continuous-23108-both_sexes-irnt | Impedance of leg (left)                   | -11.73                | 0.01  |
|                                                 | continuous-23107-both_sexes-irnt | Impedance of leg (right)                  | -11.25                | 0.01  |

\*beta is given as the absolute value

Phenotypes from the "Blood count" category 100081 of the UKBB are shown in bold

**Table S16: Gemma results for the 44 candidate SNPs. P-val is adjusted for multitesting using Benjamini-Hochberg procedure for the number of SNPs tested**

P-values and Betas obtained from GEMMA LMM for the SNPs of interest and the phenotype residuals, corrected for the relatedness matrix. Betas are given between parenthesis.  
 For each phenotype, given P-values are corrected for multi-testing across 44 SNPs with the Benjamini-Hochberg procedure (Benjamini & Hochberg, 1995).  
 For further discussion on the multi-testing burden see Supplementary Note S15

| CHR   | Candidate SNP pos (BP, GRCh38) | Waist**                  | FEV1**         | Chest min**    | Hemoglobine*   | Weight**       | Heart rate*           | Dia*           | Height*        | FVC**          | PEF**          | Sys*           | Chest max**    | BMI*           |
|-------|--------------------------------|--------------------------|----------------|----------------|----------------|----------------|-----------------------|----------------|----------------|----------------|----------------|----------------|----------------|----------------|
| chr1  | rs368120563                    | 89127023 0.967 (0.728)   | 0.67 (-0.318)  | 0.969 (0.019)  | 0.935 (-0.246) | 0.998 (-0.475) | 0.863 (-0.269)        | 0.799 (1.022)  | 0.416 (1.378)  | 0.505 (-0.284) | 0.995 (-0.421) | 0.867 (1.127)  | 0.96 (0.014)   | 0.999 (-0.172) |
| chr1  | rs887476833                    | 95547804 0.967 (1.137)   | 0.681 (0.155)  | 0.765 (0.306)  | 0.935 (0.142)  | 0.998 (0.907)  | 0.821 (0.662)         | 0.869 (-0.476) | 0.463 (-1.264) | 0.505 (0.286)  | 0.995 (0.05)   | 0.959 (0.374)  | 0.677 (0.38)   | 0.999 (0.394)  |
| chr1  | .                              | 237859017 0.967 (1.737)  | 0.681 (-0.249) | 0.628 (0.768)  | 0.865 (-0.743) | 0.998 (0.373)  | 0.821 (-1.488)        | 0.848 (1.318)  | 0.536 (2.02)   | 0.505 (-0.479) | 0.995 (-0.1)   | 0.867 (-1.825) | 0.336 (0.926)  | 0.999 (0.057)  |
| chr2  | rs7583123                      | 124228148 0.967 (-0.259) | 0.67 (0.216)   | 0.882 (-0.086) | 0.56 (0.515)   | 0.998 (-0.352) | 0.239 (-2.436)        | 0.848 (0.76)   | 0.463 (-1.07)  | 0.741 (0.15)   | 0.995 (0.241)  | 0.867 (1.675)  | 0.949 (0.055)  | 0.999 (-0.176) |
| chr2  | rs74621527                     | 151194524 0.967 (-0.46)  | 0.67 (0.319)   | 0.882 (-0.098) | 0.865 (-0.553) | 0.998 (-0.439) | 0.821 (-1.129)        | 0.7 (-2.162)   | 0.622 (0.724)  | 0.505 (0.383)  | 0.995 (0.432)  | 0.867 (4.449)  | 0.949 (-0.057) | 0.999 (-0.026) |
| chr2  | .                              | 200269472 0.967 (-2.464) | 0.67 (-0.67)   | 0.87 (-0.545)  | 0.935 (0.843)  | 0.949 (-6.645) | 0.857 (-1.179)        | 0.869 (1.455)  | 0.487 (-3.238) | 0.505 (-0.628) | 0.83 (-1.975)  | 0.867 (4.34)   | 0.884 (-0.55)  | 0.727 (-2.372) |
| chr2  | rs376150658                    | 241862387 0.967 (0.906)  | 0.989 (-0.018) | 0.765 (0.305)  | 0.971 (-0.086) | 0.998 (1.339)  | 0.821 (-1.154)        | 0.848 (-0.916) | 0.665 (-0.55)  | 0.921 (-0.048) | 0.995 (-0.299) | 0.867 (2.831)  | 0.613 (0.477)  | 0.999 (0.465)  |
| chr3  | rs374181005                    | 13035177 0.967 (-1.01)   | 0.929 (-0.067) | 0.765 (0.376)  | 0.935 (0.259)  | 0.998 (-0.429) | 0.821 (1.275)         | 0.848 (-0.626) | 0.439 (1.309)  | 0.741 (-0.104) | 0.995 (-0.159) | 0.867 (5.216)  | 0.613 (0.401)  | 0.999 (-0.113) |
| chr3  | rs79600167                     | 61949161 0.967 (-0.284)  | 0.67 (-0.192)  | 0.87 (0.192)   | 0.935 (-0.17)  | 0.998 (-0.314) | 0.976 (-0.03)         | 0.785 (-1.191) | 0.567 (-0.753) | 0.55 (-0.21)   | 0.995 (-0.365) | 0.867 (-2.364) | 0.949 (0.075)  | 0.999 (-0.061) |
| chr4  | rs4693058                      | 82856713 0.967 (0.444)   | 0.963 (0.049)  | 0.882 (-0.148) | 0.971 (-0.095) | 0.998 (-0.62)  | <b>0.046 (3.137)</b>  | 0.481 (2.675)  | 0.562 (0.804)  | 0.921 (-0.033) | 0.995 (-0.256) | 0.867 (2.896)  | 0.949 (-0.077) | 0.999 (-0.214) |
| chr4  | rs943845085                    | 110291463 0.967 (-0.988) | 1.0 (0.003)    | 0.882 (0.221)  | 0.935 (0.224)  | 0.949 (2.684)  | 0.821 (-1.522)        | 0.785 (-1.149) | 0.622 (-0.606) | 0.741 (0.152)  | 0.995 (-0.076) | 0.867 (1.023)  | 0.949 (0.065)  | 0.999 (0.122)  |
| chr4  | rs369030953                    | 152954793 0.981 (0.085)  | 1.0 (0.002)    | 0.765 (0.31)   | 0.935 (0.282)  | 0.998 (1.432)  | 0.821 (0.538)         | 0.481 (-2.578) | 0.935 (-0.092) | 0.921 (0.03)   | 0.995 (-0.478) | 0.959 (0.376)  | 0.744 (0.306)  | 0.727 (0.671)  |
| chr4  | rs926184421                    | 171895323 0.967 (-1.273) | 0.71 (-0.538)  | 0.882 (-0.396) | 0.865 (-1.131) | 0.998 (-0.24)  | 0.821 (-1.214)        | 0.946 (-0.274) | 0.657 (-1.174) | 0.853 (-0.338) | 0.995 (-2.024) | 0.867 (-3.603) | 0.949 (-0.158) | 0.999 (-0.027) |
| chr5  | rs36003688                     | 65534488 0.967 (0.483)   | 0.681 (0.166)  | 0.997 (0.001)  | 0.971 (-0.029) | 0.998 (-0.569) | 0.821 (-1.027)        | 0.869 (0.462)  | 0.567 (-0.761) | 0.741 (0.127)  | 0.995 (0.212)  | 0.867 (2.635)  | 0.949 (0.064)  | 0.999 (-0.156) |
| chr6  | rs940110341                    | 31000120 0.967 (-1.384)  | 0.829 (0.106)  | 0.882 (0.093)  | 1.171 (0.886)  | 0.998 (0.404)  | 0.821 (0.522)         | 0.785 (-1.149) | 0.622 (-0.606) | 0.741 (0.152)  | 0.995 (-0.076) | 0.867 (1.023)  | 0.949 (0.065)  | 0.999 (0.122)  |
| chr6  | rs9277772                      | 33131649 0.967 (1.162)   | 1.0 (0.0)      | 0.765 (0.37)   | 0.989 (0.008)  | 0.998 (0.6)    | 0.858 (0.342)         | 0.672 (2.029)  | 0.928 (-0.125) | 0.921 (0.045)  | 0.995 (0.251)  | 0.867 (-1.055) | 0.719 (0.332)  | 0.999 (0.242)  |
| chr6  | rs989789809                    | 85351595 0.967 (0.835)   | 0.978 (0.037)  | 0.882 (-0.135) | 0.971 (0.087)  | 0.998 (0.09)   | 0.333 (3.728)         | 0.848 (0.94)   | 0.463 (-1.864) | 0.741 (-0.207) | 0.995 (0.086)  | 0.959 (0.461)  | 0.949 (-0.039) | 0.999 (-0.017) |
| chr7  | rs6950082                      | 129637870 0.979 (0.105)  | 0.67 (-0.213)  | 0.765 (-0.255) | 0.875 (-0.329) | 0.998 (-1.031) | 0.333 (2.049)         | 0.6 (-2.094)   | 0.622 (0.576)  | 0.505 (-0.305) | 0.995 (-0.036) | 0.867 (-2.669) | 0.719 (-0.287) | 0.999 (-0.376) |
| chr7  | rs17170618                     | 147610112 0.967 (-0.907) | 0.978 (0.024)  | 0.894 (-0.057) | 0.935 (-0.143) | 0.998 (0.009)  | 0.821 (0.979)         | 0.461 (-2.899) | 0.562 (-0.821) | 0.934 (0.013)  | 0.995 (0.084)  | 0.867 (1.143)  | 0.884 (-0.178) | 0.999 (-0.056) |
| chr8  | rs187915256                    | 133959118 0.967 (-6.704) | NA             | 0.882 (-0.696) | 0.935 (-1.093) | 0.998 (-1.211) | 0.821 (3.61)          | 0.461 (18.607) | 0.898 (-1.199) | NA             | NA             | 0.867 (19.996) | 0.949 (-0.424) | 0.999 (0.004)  |
| chr9  | rs28728004                     | 85560644 0.979 (-0.166)  | 0.978 (-0.025) | 0.791 (0.238)  | 0.935 (-0.22)  | 0.998 (0.997)  | 0.821 (0.493)         | 0.602 (-2.206) | 0.792 (0.299)  | 0.921 (-0.032) | 0.995 (-0.002) | 0.867 (-3.446) | 0.884 (0.188)  | 0.999 (0.401)  |
| chr9  | rs372277219                    | 93845307 0.979 (-0.307)  | 0.978 (-0.043) | 0.808 (-0.294) | 0.56 (-0.891)  | 0.998 (0.453)  | 0.821 (1.063)         | 0.946 (-0.189) | 0.146 (2.916)  | 0.853 (-0.088) | 0.995 (-0.166) | 0.867 (1.91)   | 0.914 (-0.191) | 0.999 (0.132)  |
| chr10 | rs10829909                     | 131130644 0.142 (2.952)  | 0.978 (0.032)  | 0.765 (0.31)   | 0.935 (0.214)  | 0.998 (0.501)  | 0.821 (-1.152)        | 0.492 (2.667)  | 0.616 (0.62)   | 0.921 (-0.031) | 0.995 (-0.041) | 0.867 (-1.83)  | 0.613 (0.396)  | 0.999 (0.117)  |
| chr12 | rs74576183                     | 6505015 0.967 (-1.033)   | 0.963 (0.05)   | 0.765 (0.355)  | 0.95 (0.112)   | 0.998 (1.208)  | <b>0.046 (-2.981)</b> | 0.803 (-0.9)   | 0.599 (0.617)  | 0.741 (0.13)   | 0.995 (0.086)  | 0.867 (-1.741) | 0.819 (0.214)  | 0.999 (0.458)  |
| chr12 | rs536947                       | 9979340 0.967 (0.638)    | 0.681 (0.128)  | 0.304 (0.606)  | 0.971 (0.058)  | 0.998 (0.826)  | 0.821 (-0.85)         | 0.461 (3.259)  | 0.886 (-0.191) | 0.741 (0.149)  | 0.995 (0.064)  | 0.867 (2.038)  | 0.336 (0.594)  | 0.999 (0.318)  |
| chr12 | rs376870800                    | 58569336 0.967 (-1.122)  | 0.963 (0.048)  | 0.908 (-0.049) | 0.935 (0.238)  | 0.998 (-0.791) | 0.821 (-0.79)         | 0.891 (0.313)  | 0.622 (-0.558) | 0.741 (0.105)  | 0.995 (0.331)  | 0.867 (1.663)  | 0.949 (0.023)  | 0.999 (-0.267) |
| chr12 | rs1032698711                   | 103794720 0.967 (-0.864) | 1.0 (0.006)    | 0.765 (0.294)  | 0.971 (0.093)  | 0.998 (0.911)  | 0.97 (-0.075)         | 0.602 (-2.244) | 0.792 (0.326)  | 0.921 (-0.024) | 0.995 (0.065)  | 0.867 (-4.889) | 0.719 (0.313)  | 0.999 (0.381)  |
| chr12 | rs75047318                     | 120431276 0.982 (0.072)  | 0.681 (0.315)  | 0.166 (1.138)  | 0.935 (-0.354) | 0.998 (2.082)  | 0.821 (-1.399)        | 0.785 (-1.687) | 0.193 (2.707)  | 0.505 (0.464)  | 0.995 (0.014)  | 0.867 (5.472)  | 0.114 (1.199)  | 0.999 (0.71)   |
| chr13 | rs1033760372                   | 47662268 0.967 (-1.619)  | 0.681 (-0.174) | 0.882 (-0.132) | 0.352 (-0.839) | 0.998 (-0.436) | 0.821 (1.06)          | 0.183 (-5.833) | 0.567 (0.849)  | 0.741 (-0.187) | 0.995 (-0.385) | 0.867 (-5.542) | 0.949 (-0.133) | 0.999 (-0.138) |
| chr13 | rs537391125                    | 61791792 0.365 (-4.248)  | 0.87 (0.193)   | 0.166 (-1.177) | 0.875 (-0.678) | 0.998 (-2.552) | 0.821 (0.902)         | 0.616 (-3.697) | 0.536 (1.798)  | 0.853 (0.164)  | 0.995 (1.434)  | 0.867 (-3.936) | 0.114 (-1.152) | 0.999 (-0.96)  |
| chr13 | rs72634302                     | 89848283 0.967 (1.688)   | 0.681 (-0.18)  | 0.882 (0.133)  | 0.935 (-0.142) | 0.998 (0.668)  | 0.821 (-1.368)        | 0.785 (1.14)   | 0.754 (0.348)  | 0.505 (-0.284) | 0.995 (-0.158) | 0.867 (2.332)  | 0.914 (0.153)  | 0.999 (0.205)  |
| chr13 | rs16965509                     | 104870821 0.967 (-0.311) | 0.87 (-0.076)  | 0.882 (-0.143) | 0.971 (-0.067) | 0.998 (-1.141) | 0.821 (0.633)         | 0.461 (-2.838) | 0.886 (-0.19)  | 0.741 (-0.091) | 0.995 (-0.125) | 0.959 (-0.393) | 0.751 (-0.243) | 0.999 (-0.424) |
| chr14 | rs1594377001                   | 37197894 0.967 (0.499)   | 0.681 (0.376)  | 0.765 (0.469)  | 0.875 (-0.621) | 0.998 (0.859)  | 0.821 (1.933)         | 0.7 (-2.881)   | 0.657 (0.906)  | 0.741 (0.352)  | 0.995 (1.025)  | 0.867 (-8.996) | 0.751 (0.458)  | 0.999 (0.311)  |
| chr14 | rs1033848215                   | 60160438 0.967 (0.786)   | 0.963 (0.052)  | 0.765 (-0.249) | 0.935 (0.143)  | 0.949 (2.394)  | 0.877 (-0.211)        | 0.848 (-0.828) | 0.343 (-1.442) | 0.895 (0.057)  | 0.995 (0.024)  | 0.867 (1.007)  | 0.751 (-0.255) | 0.727 (0.889)  |
| chr14 | rs12885954                     | 77524491 0.979 (0.113)   | 0.681 (0.153)  | 0.882 (-0.065) | 0.935 (-0.151) | 0.998 (0.691)  | 0.821 (-0.536)        | 0.481 (2.535)  | 0.657 (-0.438) | 0.741 (0.106)  | 0.375 (1.053)  | 0.994 (0.065)  | 0.926 (-0.127) | 0.999 (0.291)  |
| chr14 | rs8003454                      | 92251093 0.967 (0.86)    | 0.681 (0.121)  | 0.882 (-0.073) | 0.935 (0.229)  | 0.998 (0.056)  | 0.821 (-0.461)        | 0.672 (-1.721) | 0.562 (-0.815) | 0.741 (0.117)  | 0.995 (0.294)  | 0.867 (-1.4)   | 0.949 (0.026)  | 0.999 (-0.034) |
| chr16 | rs2287123                      | 87839137 0.967 (-0.526)  | 0.681 (-0.179) | 0.628 (-0.483) | 0.56 (-0.603)  | 0.998 (-0.585) | 0.821 (0.877)         | 0.183 (-5.312) | 0.567 (0.833)  | 0.505 (-0.367) | 0.995 (0.12)   | 0.867 (-4.503) | 0.613 (-0.395) | 0.999 (-0.24)  |
| chr17 | rs575590765                    | 54041157 0.982 (-0.031)  | 0.849 (-0.136) | 0.765 (-0.357) | 0.971 (-0.06)  | 0.998 (-0.197) | 0.821 (-1.474)        | 0.593 (-3.239) | 0.656 (-0.728) | 0.741 (-0.173) | 0.995 (0.472)  | 0.867 (-4.536) | 0.613 (-0.503) | 0.999 (0.011)  |
| chr18 | rs371858795                    | 4162760 0.967 (-0.696)   | 0.681 (0.199)  | 0.882 (0.141)  | 0.865 (0.48)   | 0.998 (-0.618) | 0.386 (2.101)         | 0.672 (-1.703) | 0.935 (0.074)  | 0.598 (0.239)  | 0.995 (-0.346) | 0.867 (-4.403) | 0.863 (0.217)  | 0.999 (-0.186) |
| chr18 | rs2848745                      | 41477761 0.967 (0.505)   | 0.681 (-0.173) | 0.882 (0.144)  | 0.989 (-0.006) | 0.998 (0.198)  | 0.863 (-0.383)        | 0.672 (2.218)  | 0.463 (1.556)  | 0.741 (-0.188) | 0.995 (-0.094) | 0.867 (3.788)  | 0.914 (0.187)  | 0.999 (0.095)  |
| chr19 | rs900717974                    | 12067828 0.979 (0.281)   | 0.67 (0.386)   | 0.882 (-0.13)  | 0.971 (-0.052) | 0.998 (-0.005) | 0.821 (-2.417)        | 0.461 (-6.081) | 0.487 (-1.935) | 0.55 (0.345)   | 0.995 (-0.307) | 0.994 (-0.039) | 0.949 (-0.134) | 0.999 (0.054)  |
| chr19 | rs1870071                      | 16394295 0.967 (-0.384)  | 0.694 (-0.122) | 0.791 (-0.252) | 0.966 (-0.107) | 0.998 (0.185)  | 0.858 (0.327)         | 0.461 (-3.401) | 0.343 (1.473)  | 0.741 (-0.136) | 0.995 (-0.159) | 0.867 (-2.915) | 0.613 (-0.376) | 0.999 (0.068)  |
| chr19 | .                              | 54200712 0.967 (1.642)   | 0.963 (0.09)   | 0.882 (-0.144) | 0.56 (-1.005)  | 0.998 (0.223)  | 0.821 (1.082)         | 0.461 (-5.023) | 0.599 (-1.232) | 0.934 (0.023)  | 0.995 (0.457)  | 0.867 (-8.173) | 0.949 (0.035)  | 0.999 (0.218)  |
| chr22 | .                              | 45617645 0.967 (0.644)   | 0.67 (0.423)   | 0.969 (0.037)  | 0.935 (-0.253) | 0.998 (1.862)  | 0.857 (0.768)         | 0.799 (2.056)  | 0.935 (-0.111) | 0.505 (0.475)  | 0.995 (1.023)  | 0.867 (2.274)  | 0.949 (-0.133) | 0.999 (0.601)  |

Beta's are given considering the derived allele as the effect allele

\*residuals for age and gender

\*\* residuals for age, gender and height

beta in absolute value when we don't have the ancestral allele information

X some genotype groups are too small to allow comparison

in bold, pval < 0.05

**Table S14: Candidate SNPs driving selection in PNG highlanders with significant eQTL in the GTEx Portal**  
P-values and Normalized effect size were accessed from the GTEx portal (<https://www.gtexportal.org>)

| Candidate SNP     | Gene             | P-Value  | Normalized effect size              | Tissue                                    |                    |
|-------------------|------------------|----------|-------------------------------------|-------------------------------------------|--------------------|
| <b>rs74621527</b> | TNFAIP6          | 1.70E-13 | 0.34                                | Whole Blood                               |                    |
|                   | TNFAIP6          | 6.70E-12 | 0.49                                | Cells - Cultured fibroblasts              |                    |
|                   | NMI              | 1.10E-07 | 0.39                                | Cells - Cultured fibroblasts              |                    |
|                   | RBM43            | 2.20E-06 | 0.24                                | Whole Blood                               |                    |
|                   | NMI              | 1.90E-04 | -0.21                               | Thyroid                                   |                    |
| <b>rs9277772</b>  | HLA-DPA1         | 2.60E-23 | 0.85                                | Cells - Cultured fibroblasts              |                    |
|                   | HCG24            | 1.70E-20 | 1.20                                | Brain - Cerebellum                        |                    |
|                   | HCG24            | 5.70E-19 | 0.97                                | Brain - Nucleus accumbens (basal ganglia) |                    |
|                   | HCG24            | 1.90E-18 | 1.00                                | Brain - Caudate (basal ganglia)           |                    |
|                   | HLA-DPB2         | 1.90E-15 | -0.46                               | Whole Blood                               |                    |
|                   | HCG24            | 4.70E-14 | 1.00                                | Brain - Cerebellar Hemisphere             |                    |
|                   | COL11A2          | 1.30E-11 | 0.68                                | Brain - Cerebellum                        |                    |
|                   | HLA-DPB2         | 2.50E-11 | -0.51                               | Nerve - Tibial                            |                    |
|                   | HLA-DPB2         | 7.00E-10 | -0.46                               | Lung                                      |                    |
|                   | HLA-DPB2         | 2.40E-09 | -0.42                               | Thyroid                                   |                    |
|                   | HLA-DPB2         | 5.30E-09 | -0.58                               | Brain - Hypothalamus                      |                    |
|                   | COL11A2          | 5.70E-09 | 0.66                                | Brain - Cerebellar Hemisphere             |                    |
|                   | HLA-DPB2         | 8.10E-09 | -0.47                               | Adipose - Subcutaneous                    |                    |
|                   | HCG24            | 1.50E-08 | 0.59                                | Brain - Hypothalamus                      |                    |
|                   | HLA-DPB2         | 1.70E-08 | -0.84                               | Cells - EBV-transformed lymphocytes       |                    |
|                   | HLA-DPB2         | 3.20E-08 | -0.38                               | Artery - Tibial                           |                    |
|                   | HCG24            | 3.90E-08 | 0.68                                | Brain - Putamen (basal ganglia)           |                    |
|                   | HLA-DPB2         | 5.60E-08 | -0.71                               | Brain - Cerebellum                        |                    |
|                   | HLA-DPB2         | 9.60E-08 | -0.46                               | Skin - Not Sun Exposed (Suprapubic)       |                    |
|                   | HLA-DPB2         | 2.00E-07 | -0.54                               | Colon - Sigmoid                           |                    |
|                   | HLA-DPB2         | 9.00E-07 | -0.39                               | Esophagus - Mucosa                        |                    |
|                   | RPL32P1          | 1.50E-06 | 0.32                                | Adipose - Subcutaneous                    |                    |
|                   | HLA-DPA1         | 1.50E-06 | 0.32                                | Testis                                    |                    |
|                   | HLA-DPB2         | 1.80E-06 | -0.54                               | Pituitary                                 |                    |
|                   | HLA-DPB2         | 2.40E-06 | -0.69                               | Brain - Cerebellar Hemisphere             |                    |
|                   | HLA-DPB2         | 2.90E-06 | -0.38                               | Esophagus - Muscularis                    |                    |
|                   | HLA-DPB2         | 3.90E-06 | -0.40                               | Artery - Aorta                            |                    |
|                   | HLA-DPA3         | 7.10E-06 | 0.62                                | Brain - Cerebellum                        |                    |
|                   | HLA-DPB2         | 7.60E-06 | -0.34                               | Skin - Sun Exposed (Lower leg)            |                    |
|                   | HLA-DPB2         | 8.20E-06 | -0.45                               | Small Intestine - Terminal Ileum          |                    |
|                   | WDR46            | 9.30E-06 | 0.10                                | Cells - Cultured fibroblasts              |                    |
|                   | WDR46            | 1.50E-05 | 0.36                                | Brain - Cerebellum                        |                    |
|                   | RXR8             | 1.50E-05 | 0.31                                | Brain - Cerebellum                        |                    |
|                   | WDR46            | 1.70E-05 | 0.10                                | Lung                                      |                    |
|                   | HLA-DPB2         | 1.90E-05 | -0.43                               | Breast - Mammary Tissue                   |                    |
|                   | RPL32P1          | 1.90E-05 | 0.27                                | Skin - Not Sun Exposed (Suprapubic)       |                    |
|                   | RPL32P1          | 2.40E-05 | 0.32                                | Esophagus - Muscularis                    |                    |
|                   | CUTA             | 2.60E-05 | -0.10                               | Artery - Tibial                           |                    |
|                   | HCG24            | 2.70E-05 | 0.39                                | Brain - Hippocampus                       |                    |
|                   | RPL32P1          | 4.00E-05 | 0.35                                | Breast - Mammary Tissue                   |                    |
|                   | RPL32P1          | 4.30E-05 | 0.27                                | Skin - Sun Exposed (Lower leg)            |                    |
| TAPBP             | 4.60E-05         | 0.14     | Nerve - Tibial                      |                                           |                    |
| WDR46             | 4.60E-05         | 0.09     | Muscle - Skeletal                   |                                           |                    |
| RING1             | 7.50E-05         | -0.15    | Thyroid                             |                                           |                    |
| CUTA              | 7.90E-05         | -0.14    | Adipose - Visceral (Omentum)        |                                           |                    |
| CUTA              | 9.00E-05         | -0.13    | Skin - Not Sun Exposed (Suprapubic) |                                           |                    |
| RPL32P1           | 1.20E-04         | 0.22     | Nerve - Tibial                      |                                           |                    |
| CUTA              | 1.50E-04         | -0.11    | Nerve - Tibial                      |                                           |                    |
| ACRBP             | 1.30E-05         | -0.65    | Skin - Sun Exposed (Lower leg)      |                                           |                    |
| <b>rs536947</b>   | CLEC12A          | 5.60E-09 | -0.37                               | Cells - Cultured fibroblasts              |                    |
|                   | CLEC12A          | 1.00E-08 | -0.46                               | Heart - Atrial Appendage                  |                    |
|                   | CLEC12A          | 1.10E-08 | -0.40                               | Muscle - Skeletal                         |                    |
|                   | CLEC12A          | 1.40E-08 | -0.35                               | Lung                                      |                    |
|                   | CLEC12B          | 1.50E-08 | -0.46                               | Nerve - Tibial                            |                    |
|                   | CLEC1B           | 4.50E-08 | -0.45                               | Nerve - Tibial                            |                    |
|                   | CLEC12B          | 4.90E-08 | -0.33                               | Whole Blood                               |                    |
|                   | CLEC12A          | 6.30E-08 | -0.39                               | Adipose - Subcutaneous                    |                    |
|                   | CLEC12A          | 1.00E-07 | -0.43                               | Nerve - Tibial                            |                    |
|                   | CLEC12B          | 6.10E-07 | -0.35                               | Adipose - Subcutaneous                    |                    |
|                   | CLEC12A          | 8.50E-07 | -0.26                               | Whole Blood                               |                    |
|                   | CLEC12A          | 7.80E-06 | -0.30                               | Thyroid                                   |                    |
|                   | CLEC12A          | 1.20E-05 | -0.36                               | Esophagus - Muscularis                    |                    |
|                   | CLEC12B          | 1.90E-05 | -0.28                               | Lung                                      |                    |
|                   | CLEC1B           | 4.10E-05 | -0.30                               | Adipose - Subcutaneous                    |                    |
|                   | CLEC12A          | 5.00E-05 | -0.38                               | Breast - Mammary Tissue                   |                    |
|                   | CLEC12A          | 6.60E-05 | -0.27                               | Artery - Tibial                           |                    |
|                   | CLEC12A          | 7.60E-05 | -0.26                               | Skin - Sun Exposed (Lower leg)            |                    |
|                   | CLEC12B          | 1.20E-04 | -0.32                               | Esophagus - Muscularis                    |                    |
|                   | <b>rs8003454</b> | SLC24A4  | 6.70E-06                            | -0.25                                     | Brain - Cerebellum |

**Table S15: Candidate SNPs driving selection in PNG lowlanders with significant eQTL in the GTEx Portal**P-values and Normalized effect size were accessed from the GTEx portal (<https://www.gtexportal.org>)

| Candidate SNP     | Gene          | P-Value  | Normalized effect size | Tissue                                    |
|-------------------|---------------|----------|------------------------|-------------------------------------------|
| <b>rs4693058</b>  | THAP9-AS1     | 3.40E-15 | 0.31                   | Cells - Cultured fibroblasts              |
|                   | THAP9-AS1     | 8.50E-14 | 0.19                   | Artery - Tibial                           |
|                   | THAP9-AS1     | 4.80E-12 | 0.19                   | Muscle - Skeletal                         |
|                   | SCD5          | 1.40E-09 | -0.18                  | Whole Blood                               |
|                   | THAP9-AS1     | 3.00E-09 | 0.37                   | Brain - Hippocampus                       |
|                   | THAP9         | 3.70E-09 | 0.16                   | Nerve - Tibial                            |
|                   | THAP9-AS1     | 4.10E-07 | 0.11                   | Esophagus - Muscularis                    |
|                   | THAP9-AS1     | 1.30E-06 | 0.33                   | Cells - EBV-transformed lymphocytes       |
|                   | THAP9-AS1     | 1.70E-06 | 0.08                   | Thyroid                                   |
|                   | LIN54         | 1.90E-06 | 0.21                   | Spleen                                    |
|                   | THAP9-AS1     | 6.00E-06 | 0.12                   | Artery - Aorta                            |
|                   | THAP9-AS1     | 6.00E-06 | 0.09                   | Lung                                      |
|                   | THAP9-AS1     | 7.60E-06 | 0.22                   | Brain - Cortex                            |
|                   | THAP9-AS1     | 8.70E-06 | 0.10                   | Adipose - Subcutaneous                    |
|                   | THAP9-AS1     | 1.20E-05 | 0.29                   | Brain - Putamen (basal ganglia)           |
|                   | THAP9-AS1     | 1.40E-05 | 0.29                   | Brain - Hypothalamus                      |
|                   | THAP9-AS1     | 2.10E-05 | 0.26                   | Brain - Nucleus accumbens (basal ganglia) |
|                   | THAP9         | 2.10E-05 | 0.18                   | Esophagus - Gastroesophageal Junction     |
|                   | THAP9         | 2.10E-05 | 0.20                   | Pituitary                                 |
|                   | THAP9         | 2.60E-05 | 0.19                   | Heart - Atrial Appendage                  |
|                   | THAP9-AS1     | 4.40E-05 | 0.19                   | Brain - Cerebellum                        |
|                   | THAP9         | 8.80E-05 | 0.10                   | Thyroid                                   |
|                   | THAP9-AS1     | 1.80E-04 | 0.07                   | Nerve - Tibial                            |
| <b>rs12885954</b> | GSTZ1         | 1.10E-05 | 0.22                   | Skin - Sun Exposed (Lower leg)            |
|                   | GSTZ1         | 4.00E-05 | 0.17                   | Lung                                      |
| <b>rs1870071</b>  | CTD-2013N17.6 | 4.90E-17 | -0.20                  | Thyroid                                   |
|                   | EPS15L1       | 2.10E-11 | 0.21                   | Esophagus - Muscularis                    |
|                   | CTD-2013N17.6 | 4.50E-10 | -0.15                  | Skin - Sun Exposed (Lower leg)            |
|                   | CTD-2013N17.6 | 2.30E-09 | -0.28                  | Testis                                    |
|                   | C19orf44      | 2.50E-09 | -0.18                  | Thyroid                                   |
|                   | C19orf44      | 3.00E-08 | -0.20                  | Artery - Tibial                           |
|                   | C19orf44      | 5.50E-08 | -0.18                  | Breast - Mammary Tissue                   |
|                   | CTD-2013N17.6 | 5.70E-08 | -0.14                  | Skin - Not Sun Exposed (Suprapubic)       |
|                   | C19orf44      | 7.20E-08 | -0.22                  | Nerve - Tibial                            |
|                   | C19orf44      | 7.90E-08 | -0.15                  | Muscle - Skeletal                         |
|                   | SLC35E1       | 1.80E-07 | 0.14                   | Testis                                    |
|                   | C19orf44      | 3.20E-07 | -0.14                  | Adipose - Visceral (Omentum)              |
|                   | CTD-2013N17.6 | 6.30E-07 | -0.10                  | Whole Blood                               |
|                   | C19orf44      | 6.70E-07 | -0.21                  | Artery - Aorta                            |
|                   | C19orf44      | 8.00E-07 | -0.17                  | Skin - Not Sun Exposed (Suprapubic)       |
|                   | C19orf44      | 4.10E-06 | -0.13                  | Skin - Sun Exposed (Lower leg)            |
|                   | C19orf44      | 8.30E-06 | -0.18                  | Esophagus - Muscularis                    |
|                   | C19orf44      | 1.40E-05 | -0.16                  | Stomach                                   |
|                   | CTD-2013N17.6 | 1.50E-05 | -0.12                  | Adipose - Subcutaneous                    |
|                   | EPS15L1       | 2.00E-05 | 0.11                   | Artery - Tibial                           |
|                   | C19orf44      | 3.70E-05 | -0.24                  | Adrenal Gland                             |
|                   | C19orf44      | 3.90E-05 | -0.13                  | Esophagus - Mucosa                        |
|                   | C19orf44      | 4.80E-05 | -0.19                  | Heart - Left Ventricle                    |
|                   | C19orf44      | 4.90E-05 | -0.13                  | Adipose - Subcutaneous                    |
|                   | C19orf44      | 5.50E-05 | -0.23                  | Pancreas                                  |
|                   | CTD-3222D19.9 | 1.10E-04 | 0.18                   | Thyroid                                   |
|                   | EPS15L1       | 1.30E-04 | 0.07                   | Muscle - Skeletal                         |

**Table S16: VEP results for the SNPs in LD with the candidate SNPs ( $R^2 \geq 0.5$ ) in PNG highlanders in a window of 500kb flanking the core SNP**

| Candidate SNP* | total snps | reg snps | regulatory region variant | TF binding site variant | 5 prime UTR variant | missense variant | 3 prime UTR variant | splice polypyrimidine tract variant | splice region variant |
|----------------|------------|----------|---------------------------|-------------------------|---------------------|------------------|---------------------|-------------------------------------|-----------------------|
| rs887476833    | 20         | NA       | NA                        | NA                      | NA                  | NA               | NA                  | NA                                  | NA                    |
| rs74621527     | 75         | 15       | 15                        | NA                      | NA                  | NA               | NA                  | NA                                  | NA                    |
| rs374181005    | 2          | NA       | NA                        | NA                      | NA                  | NA               | NA                  | NA                                  | NA                    |
| rs79600167     | 67         | 30       | 30                        | 1                       | NA                  | NA               | NA                  | NA                                  | NA                    |
| rs943845085    | 1          | NA       | NA                        | NA                      | NA                  | NA               | NA                  | NA                                  | NA                    |
| rs369030953    | 7          | 2        | 1                         | NA                      | NA                  | 1                | 1                   | NA                                  | NA                    |
| rs940110341    | 30         | 14       | 13                        | NA                      | 1                   | NA               | NA                  | NA                                  | NA                    |
| rs9277772      | 166        | 81       | 77                        | 14                      | NA                  | 1                | 1                   | 2                                   | 1                     |
| rs17170618     | 130        | 24       | 24                        | NA                      | NA                  | NA               | NA                  | NA                                  | NA                    |
| rs28728004     | 57         | 13       | 13                        | 1                       | NA                  | NA               | NA                  | NA                                  | NA                    |
| rs10829909     | 42         | 18       | 18                        | NA                      | NA                  | NA               | NA                  | NA                                  | NA                    |
| rs74576183     | 29         | 17       | 17                        | 4                       | 1                   | 1                | NA                  | NA                                  | NA                    |
| rs536947       | 26         | 9        | 8                         | NA                      | NA                  | NA               | 2                   | NA                                  | NA                    |
| rs376870800    | 73         | 19       | 19                        | 2                       | NA                  | NA               | NA                  | NA                                  | NA                    |
| rs1032698711   | 5          | 2        | 2                         | NA                      | NA                  | NA               | NA                  | NA                                  | NA                    |
| rs1033760372   | 25         | 2        | 2                         | NA                      | NA                  | NA               | NA                  | NA                                  | NA                    |
| rs16965509     | 42         | 1        | 1                         | NA                      | NA                  | NA               | NA                  | NA                                  | NA                    |
| rs1033848215   | 169        | 37       | 34                        | 3                       | NA                  | 1                | 2                   | 1                                   | NA                    |
| rs8003454      | 17         | 1        | 1                         | NA                      | NA                  | NA               | NA                  | NA                                  | NA                    |
| rs371858795    | 36         | 4        | 4                         | NA                      | NA                  | NA               | NA                  | NA                                  | NA                    |
| rs1601558750   | 1          | NA       | NA                        | NA                      | NA                  | NA               | NA                  | NA                                  | NA                    |

\*When no rs id given we gave the GRCh38 coordinate of the SNP

regSNPs = SNPs with consequenced in the genomic region, regulatory region variant = SNP located within a regulatory region, TF binding site variant=SNP located within a transcription factor binding site 5 prime UTR variant =SNP that are UTR variant of the 5' UTR, 3 prime UTR variant = SNP that are UTR variant of the 3' UTR, missense variant = SNP that changes one or more bases, resulting in a different amino acid sequence but where the length is preserved, Splice polypyrimidine tract variant = SNP that falls in the polypyrimidine tract at 3' end of intron between 17 and 3 bases from the end (acceptor -3 to acceptor -17), splice region variant = SNP in which a change has occurred within the region of the splice site, either within 1-3 bases of the exon or 3-8 bases of the intron

**Table S17: VEP results for the SNPs in LD with the candidate SNPs ( $r^2 \geq 0.5$ ) in PNG lowlanders in a window of 500kb flanking the core SNP**

| Candidate SNP* | total snps | reg snps | missens                   |                         |                     |           |                     |                                     |                       |
|----------------|------------|----------|---------------------------|-------------------------|---------------------|-----------|---------------------|-------------------------------------|-----------------------|
|                |            |          | regulatory region variant | TF binding site variant | 5 prime UTR variant | e variant | 3 prime UTR variant | splice polypyrimidine tract variant | splice region variant |
| rs368120563    | 213        | 40       | 26                        | 2                       | NA                  | 4         | 9                   | NA                                  | NA                    |
| rs1574154373   | 7          | 2        | 2                         | NA                      | NA                  | NA        | NA                  | NA                                  | NA                    |
| rs7583123      | 94         | 4        | 4                         | NA                      | NA                  | NA        | NA                  | NA                                  | NA                    |
| chr2:200269472 | 3          | 1        | 1                         | NA                      | NA                  | NA        | NA                  | NA                                  | NA                    |
| rs376150658    | 2          | 1        | 1                         | NA                      | NA                  | NA        | NA                  | NA                                  | NA                    |
| rs926184421    | 68         | 20       | 18                        | NA                      | NA                  | NA        | 2                   | NA                                  | NA                    |
| rs4693058      | 4          | NA       | NA                        | NA                      | NA                  | NA        | NA                  | NA                                  | NA                    |
| rs36003688     | 58         | 18       | 15                        | 1                       | 1                   | NA        | 6                   | NA                                  | NA                    |
| rs989789809    | 1          | NA       | NA                        | NA                      | NA                  | NA        | NA                  | NA                                  | NA                    |
| rs6950082      | 1          | NA       | NA                        | NA                      | NA                  | NA        | NA                  | NA                                  | NA                    |
| rs187915256    | 3          | NA       | NA                        | NA                      | NA                  | NA        | NA                  | NA                                  | NA                    |
| rs372277219    | 2          | NA       | NA                        | NA                      | NA                  | NA        | NA                  | NA                                  | NA                    |
| rs75047318     | 10         | 4        | 4                         | NA                      | NA                  | NA        | NA                  | NA                                  | NA                    |
| rs537391125    | 7          | NA       | NA                        | NA                      | NA                  | NA        | NA                  | NA                                  | NA                    |
| rs72634302     | 13         | NA       | NA                        | NA                      | NA                  | NA        | NA                  | NA                                  | NA                    |
| rs1594377001   | 7          | 2        | 2                         | NA                      | 1                   | NA        | NA                  | NA                                  | NA                    |
| rs12885954     | 35         | 7        | 6                         | 1                       | NA                  | NA        | 1                   | NA                                  | NA                    |
| rs2287123      | 9          | 3        | 3                         | NA                      | NA                  | NA        | NA                  | NA                                  | NA                    |
| rs575590765    | 2          | NA       | NA                        | NA                      | NA                  | NA        | NA                  | NA                                  | NA                    |
| rs2848745      | 155        | 8        | 8                         | NA                      | NA                  | NA        | NA                  | NA                                  | NA                    |
| rs900717974    | 8          | 1        | NA                        | NA                      | NA                  | NA        | 1                   | NA                                  | NA                    |
| rs1870071      | 15         | 3        | 3                         | NA                      | NA                  | NA        | NA                  | NA                                  | NA                    |
| rs1600734199   | 2          | 2        | 2                         | 1                       | NA                  | NA        | NA                  | NA                                  | NA                    |

\*When no rs id given we gave the GRCh38 coordinate of the SNP

regSNPs = SNPs with consequenced in the genomic region, regulatory region variant = SNP located within a regulatory region, TF binding site variant=SNP located within a transcription factor binding site 5 prime UTR variant =SNP that are UTR variant of the 5' UTR, 3 prime UTR variant = SNP that are UTR variant of the 3' UTR, missense variant = SNP that changes one or more bases, resulting in a different amino acid sequence but where the length is preserved, Splice polypyrimidine tract variant = SNP that falls in the polypyrimidine tract at 3' end of intron between 17 and 3 bases from the end (acceptor -3 to acceptor -17), splice region variant = SNP in which a change has occurred within the region of the splice site, either within 1-3 bases of the exon or 3-8 bases of the intron

Table S18: Missense variants in the region under selection in PNG highlanders and their DAF among different populations

| Genomic region<br>under selection (GRCh38) | Variant pos    | Missense variant | PNG  |      | PNG<br>diversity I | GBR  | KHV  | ESN  | CEU  | YRI  | CHB  | Nea  | Deni |
|--------------------------------------------|----------------|------------------|------|------|--------------------|------|------|------|------|------|------|------|------|
|                                            |                |                  | HL   | LL   |                    |      |      |      |      |      |      |      |      |
| <b>chr3:13010340-13217789</b>              | chr3:13022091  | IQSEC1-Y4D*      | 0.44 | 0.19 | 0.22               | 0.15 | 0.14 | 0.01 | 0.09 | 0.03 | 0.17 | 0.00 | 0.00 |
| <b>chr4:152704503-152970509</b>            | chr4:152769690 | TIGD4-I439T      | 0.15 | 0.13 | 0.11               | 0.35 | 0.30 | 0.30 | 0.43 | 0.24 | 0.33 | 0.00 | 0.00 |
|                                            | chr4:152953514 | FHDC1-A172R      | 0.69 | 0.42 | 0.55               | 0.01 | 0.07 | 0.15 | 0.01 | 0.15 | 0.11 | 0.00 | 0.00 |
| <b>chr6:30916070-31153184</b>              | chr6:30920384  | VARS2-W449Q      | 0.38 | 0.15 | 0.31               | 0.46 | 0.15 | 0.71 | 0.46 | 0.73 | 0.24 | 0.50 | 1.00 |
|                                            | chr6:30925350  | VARS2-R917Q      | 0.61 | 0.73 | 0.61               | 0.21 | 0.69 | 0.17 | 0.18 | 0.19 | 0.47 | 0.50 | 0.00 |
|                                            | chr6:30926164  | VARS2-R1049R     | 0.30 | 0.07 | 0.15               | 0.19 | 0.03 | 0.06 | 0.18 | 0.11 | 0.07 | 0.50 | 0.50 |
|                                            | chr6:30938138  | DPCR1-H75Y*      | 0.07 | 0.07 | 0.13               | 0.03 | 0.03 | 0.00 | 0.02 | 0.00 | 0.04 | 0.00 | 0.00 |
|                                            | chr6:30948928  | DPCR1-K155R      | 0.07 | 0.14 | 0.15               | 0.00 | 0.10 | 0.00 | 0.00 | 0.00 | 0.01 | 0.00 | 0.00 |
|                                            | chr6:30952101  | DPCR1-G1213G     | 0.07 | 0.07 | 0.14               | 0.12 | 0.04 | 0.51 | 0.13 | 0.46 | 0.06 | 0.00 | 0.00 |
|                                            | chr6:31025756  | MUC22-R109S      | 0.88 | 0.59 | 0.65               | 0.51 | 0.37 | 0.42 | 0.54 | 0.53 | 0.30 | 0.00 | 0.00 |
|                                            | chr6:31025999  | MUC22-T190N      | 0.19 | 0.24 | 0.20               | 0.10 | 0.05 | 0.35 | 0.08 | 0.22 | 0.15 | 0.00 | 0.00 |
|                                            | chr6:31026036  | MUC22-S202S      | 0.10 | 0.09 | 0.12               | 0.19 | 0.07 | 0.02 | 0.15 | 0.01 | 0.07 | 0.00 | 0.00 |
|                                            | chr6:31026089  | MUC22-T220I      | 0.10 | 0.09 | 0.12               | 0.16 | 0.06 | 0.03 | 0.13 | 0.03 | 0.06 | 0.00 | 0.00 |
|                                            | chr6:31027401  | MUC22-T657T      | 0.09 | 0.09 | 0.11               | 0.15 | 0.06 | 0.03 | 0.10 | 0.03 | 0.07 | 0.00 | 0.00 |
|                                            | chr6:31027410  | MUC22-I660V      | 0.91 | 0.91 | 0.89               | 0.85 | 0.94 | 0.97 | 0.90 | 0.97 | 0.93 | 1.00 | 1.00 |
|                                            | chr6:31027520  | MUC22-I697T      | 0.08 | 0.09 | 0.12               | 0.15 | 0.06 | 0.03 | 0.10 | 0.03 | 0.07 | 0.00 | 0.00 |
|                                            | chr6:31027755  | MUC22-M775I      | 0.90 | 0.91 | 0.88               | 0.85 | 0.94 | 0.97 | 0.90 | 0.97 | 0.93 | 1.00 | 1.00 |
|                                            | chr6:31028355  | MUC22-T975A      | 0.09 | 0.09 | 0.12               | 0.15 | 0.06 | 0.03 | 0.10 | 0.03 | 0.07 | 0.00 | 0.00 |
|                                            | chr6:31029504  | MUC22-V1358A     | 0.99 | 1.00 | 1.00               | 1.00 | 1.00 | 1.00 | 1.00 | 1.00 | 1.00 | 1.00 | 1.00 |
|                                            | chr6:31029557  | MUC22-T1376G     | 0.10 | 0.09 | 0.12               | 0.15 | 0.06 | 0.03 | 0.10 | 0.03 | 0.07 | 0.00 | 0.00 |
|                                            | chr6:31029575  | MUC22-S1382P     | 0.90 | 0.91 | 0.88               | 0.85 | 0.94 | 0.97 | 0.90 | 0.96 | 0.93 | 1.00 | 1.00 |
|                                            | chr6:31030047  | MUC22-L1539P     | 0.30 | 0.57 | 0.65               | 0.85 | 0.87 | 0.86 | 0.90 | 0.77 | 0.84 | 1.00 | 1.00 |
|                                            | chr6:31032220  | MUC22-L1565D     | 0.07 | 0.22 | 0.32               | 0.60 | 0.62 | 0.62 | 0.67 | 0.50 | 0.44 | 0.50 | 0.00 |
|                                            | chr6:31034675  | MUC22-N1687D     | 0.07 | 0.22 | 0.28               | 0.48 | 0.64 | 0.38 | 0.54 | 0.36 | 0.36 | 0.50 | 0.00 |
|                                            | chr6:31034750  | MUC22-N1712Q     | 0.68 | 0.55 | 0.55               | 0.54 | 0.73 | 0.34 | 0.61 | 0.33 | 0.55 | 0.00 | 0.00 |
|                                            | chr6:31054381  | HCG22-E18V       | 0.10 | 0.32 | 0.24               | 0.36 | 0.37 | 0.43 | 0.34 | 0.55 | 0.44 | 1.00 | 1.00 |
|                                            | chr6:31054418  | HCG22-A30R       | 0.10 | 0.13 | 0.12               | 0.25 | 0.18 | 0.08 | 0.22 | 0.22 | 0.18 | 0.00 | 0.00 |
|                                            | chr6:31054429  | HCG22-G34E       | 0.86 | 0.82 | 0.76               | 0.71 | 0.72 | 0.83 | 0.75 | 0.71 | 0.77 | 1.00 | 1.00 |
|                                            | chr6:31054460  | HCG22-G44P       | 0.09 | 0.12 | 0.12               | 0.25 | 0.18 | 0.08 | 0.22 | 0.22 | 0.18 | 0.00 | 0.00 |
|                                            | chr6:31054489  | HCG22-A54D       | 0.14 | 0.17 | 0.24               | 0.29 | 0.28 | 0.17 | 0.25 | 0.28 | 0.23 | 0.00 | 0.00 |
|                                            | chr6:31111487  | C6orf15-G291E    | 0.08 | 0.20 | 0.12               | 0.08 | 0.18 | 0.00 | 0.05 | 0.00 | 0.19 | 0.50 | 0.50 |
|                                            | chr6:31111866  | C6orf15-K165P    | 0.69 | 0.61 | 0.56               | 0.51 | 0.52 | 0.43 | 0.53 | 0.39 | 0.51 | 0.50 | 0.00 |
|                                            | chr6:31111926  | C6orf15-A145P    | 0.25 | 0.31 | 0.25               | 0.09 | 0.30 | 0.04 | 0.07 | 0.06 | 0.37 | 0.50 | 0.50 |
|                                            | chr6:31112112  | C6orf15-A83A     | 0.70 | 0.61 | 0.56               | 0.51 | 0.52 | 0.43 | 0.53 | 0.39 | 0.51 | 0.00 | 0.00 |
|                                            | chr6:31112117  | C6orf15-V81D     | 0.76 | 0.69 | 0.75               | 0.82 | 0.70 | 0.93 | 0.82 | 0.92 | 0.63 | 0.00 | 0.50 |
|                                            | chr6:31116036  | CDSN-N527S       | 0.29 | 0.28 | 0.34               | 0.25 | 0.16 | 0.07 | 0.26 | 0.11 | 0.14 | 0.00 | 0.00 |
|                                            | chr6:31116386  | CDSN-L410A       | 0.71 | 0.71 | 0.64               | 0.55 | 0.71 | 0.75 | 0.48 | 0.63 | 0.67 | 0.50 | 0.00 |
|                                            | chr6:31116393  | CDSN-S408D       | 0.12 | 0.25 | 0.23               | 0.16 | 0.34 | 0.09 | 0.15 | 0.09 | 0.16 | 0.50 | 0.00 |
|                                            | chr6:31116713  | CDSN-G301S       | 0.09 | 0.00 | 0.02               | 0.00 | 0.00 | 0.00 | 0.00 | 0.00 | 0.00 | 0.00 | 0.00 |
|                                            | chr6:31117010  | CDSN-F202S       | 0.17 | 0.20 | 0.24               | 0.26 | 0.25 | 0.48 | 0.22 | 0.41 | 0.27 | 0.00 | 0.00 |
|                                            | chr6:31117187  | CDSN-N143S       | 0.29 | 0.28 | 0.34               | 0.25 | 0.16 | 0.07 | 0.26 | 0.11 | 0.14 | 0.00 | 0.00 |
|                                            | chr6:31138211  | PSORS1C2-G51T    | 0.22 | 0.07 | 0.12               | 0.00 | 0.14 | 0.00 | 0.00 | 0.00 | 0.07 | 0.00 | 0.00 |
|                                            | chr6:31138682  | PSORS1C1-P24S    | 0.08 | 0.04 | 0.12               | 0.10 | 0.04 | 0.11 | 0.07 | 0.19 | 0.06 | 0.00 | 0.00 |
|                                            | chr6:31138739  | PSORS1C1-P43C    | 0.67 | 0.44 | 0.33               | 0.03 | 0.17 | 0.11 | 0.04 | 0.18 | 0.14 | 0.00 | 0.00 |
|                                            | chr6:31142614  | CCHCR1-S865H     | 0.08 | 0.04 | 0.12               | 0.31 | 0.09 | 0.24 | 0.30 | 0.22 | 0.14 | 0.00 | 0.00 |
|                                            | chr6:31143397  | CCHCR1-Q728Q     | 0.67 | 0.51 | 0.34               | 0.03 | 0.18 | 0.12 | 0.04 | 0.18 | 0.15 | 0.00 | 0.00 |
|                                            | chr6:31144707  | CCHCR1-R716R     | 0.08 | 0.04 | 0.12               | 0.08 | 0.04 | 0.02 | 0.06 | 0.07 | 0.06 | 0.00 | 0.00 |
|                                            | chr6:31145046  | CCHCR1-K635W     | 0.42 | 0.26 | 0.16               | 0.00 | 0.06 | 0.05 | 0.00 | 0.11 | 0.08 | 0.00 | 0.00 |
|                                            | chr6:31148469  | CCHCR1-R506D     | 0.75 | 0.65 | 0.53               | 0.43 | 0.39 | 0.38 | 0.41 | 0.44 | 0.33 | 0.00 | 0.50 |
|                                            | chr6:31150734  | CCHCR1-E364Q     | 0.19 | 0.24 | 0.29               | 0.24 | 0.35 | 0.15 | 0.22 | 0.20 | 0.28 | 0.00 | 0.50 |
|                                            | chr6:31151121  | CCHCR1-L268S     | 0.08 | 0.04 | 0.12               | 0.08 | 0.04 | 0.00 | 0.06 | 0.00 | 0.06 | 0.00 | 0.00 |
| <b>chr9:85458922-85745092</b>              | chr9:85692760  | AGTPBP1-N29V     | 0.08 | 0.00 | 0.02               | 0.00 | 0.00 | 0.00 | 0.00 | 0.00 | 0.00 | 0.00 | 0.00 |
| <b>chr12:6452552-6662260</b>               | chr12:6453127  | TAPBPL-A42R      | 0.10 | 0.17 | 0.21               | 0.33 | 0.31 | 0.08 | 0.25 | 0.08 | 0.30 | 0.00 | 0.00 |
|                                            | chr12:6453602  | TAPBPL-G151R     | 0.70 | 0.46 | 0.56               | 0.01 | 0.10 | 0.06 | 0.02 | 0.04 | 0.11 | 0.00 | 0.00 |
|                                            | chr12:6453657  | TAPBPL-A169E     | 0.10 | 0.17 | 0.21               | 0.34 | 0.31 | 0.17 | 0.25 | 0.17 | 0.30 | 0.00 | 1.00 |
|                                            | chr12:6510118  | NCAPD2-Q83S      | 0.06 | 0.17 | 0.18               | 0.30 | 0.33 | 0.01 | 0.25 | 0.00 | 0.29 | 0.00 | 0.00 |
|                                            | chr12:6530815  | NCAPD2-T1321L    | 0.06 | 0.03 | 0.07               | 0.25 | 0.35 | 0.05 | 0.18 | 0.02 | 0.43 | 0.00 | 0.00 |
|                                            | chr12:6555911  | IFFO1-P40I       | 0.06 | 0.02 | 0.04               | 0.00 | 0.00 | 0.00 | 0.00 | 0.00 | 0.00 | 0.00 | 0.00 |
| <b>chr12:9886812-10055333</b>              | chr12:9888765  | KLRF2-V68T       | 0.11 | 0.28 | 0.11               | 0.18 | 0.22 | 0.38 | 0.21 | 0.45 | 0.30 | 0.00 | 0.00 |
|                                            | chr12:9893453  | KLRF2-P131D      | 0.82 | 0.59 | 0.74               | 0.74 | 0.49 | 0.31 | 0.71 | 0.28 | 0.45 | 0.00 | 0.00 |
|                                            | chr12:9916703  | CLEC2A-G136      | 0.37 | 0.57 | 0.42               | 0.35 | 0.67 | 0.46 | 0.31 | 0.52 | 0.69 | 0.00 | 0.00 |

\*missense name is non-canonical

Table S19: Missense variants in the region under selection in PNG lowlanders and their DAF among different populations

| Genomic region<br>under selection (GRCh38) | Variant pos                    | Missense variant | PNG          |      |             | GBR  | KHV  | ESN  | CEU  | YRI  | CHB  | Nean | Deni |      |
|--------------------------------------------|--------------------------------|------------------|--------------|------|-------------|------|------|------|------|------|------|------|------|------|
|                                            |                                |                  | HL           | LL   | diversity I |      |      |      |      |      |      |      |      |      |
| <b>chr1:88800562-89326878</b>              | chr1:89009135                  | GBP3-C491T       | 0.92         | 0.97 | 0.93        | 0.72 | 0.81 | 0.77 | 0.64 | 0.77 | 0.77 | 1.00 | 1.00 |      |
|                                            | chr1:89109691                  | GBP2-A549T       | 0.53         | 0.82 | 0.56        | 0.00 | 0.00 | 0.00 | 0.00 | 0.00 | 0.00 | 1.00 | 1.00 |      |
|                                            | chr1:89132390                  | GBP7-L559R       | 0.47         | 0.11 | 0.43        | 1.00 | 1.00 | 1.00 | 1.00 | 1.00 | 1.00 | 0.00 | 0.00 |      |
|                                            | chr1:89150509                  | GBP7-Q231I       | 0.46         | 0.11 | 0.44        | 1.00 | 1.00 | 0.96 | 1.00 | 0.94 | 1.00 | 0.00 | 0.00 |      |
|                                            | chr1:89171895                  | GBP7-T14K        | 0.23         | 0.06 | 0.08        | 0.34 | 0.23 | 0.25 | 0.36 | 0.17 | 0.22 | 0.00 | 0.00 |      |
|                                            | chr1:89186404                  | GBP4-E546I       | 0.21         | 0.05 | 0.33        | 0.45 | 0.39 | 0.11 | 0.45 | 0.11 | 0.40 | 0.00 | 0.00 |      |
|                                            | chr1:89186405                  | GBP4-M545L       | 0.21         | 0.05 | 0.33        | 0.45 | 0.39 | 0.11 | 0.45 | 0.11 | 0.40 | 0.00 | 0.00 |      |
|                                            | chr1:89186407                  | GBP4-M545I       | 0.21         | 0.05 | 0.33        | 0.45 | 0.39 | 0.11 | 0.45 | 0.11 | 0.40 | 0.00 | 0.00 |      |
|                                            | chr1:89186414                  | GBP4-M542N       | 0.21         | 0.05 | 0.33        | 0.45 | 0.39 | 0.11 | 0.45 | 0.11 | 0.40 | 0.00 | 0.00 |      |
|                                            | chr1:89186419                  | GBP4-Y541R       | 0.21         | 0.05 | 0.33        | 0.45 | 0.39 | 0.11 | 0.45 | 0.11 | 0.40 | 0.00 | 0.00 |      |
| chr1:89188617                              | GBP4-W459L                     | 0.47             | 0.14         | 0.44 | 1.00        | 1.00 | 1.00 | 1.00 | 1.00 | 1.00 | 0.00 | 0.00 |      |      |
| <b>chr2:200238798-200432145</b>            | chr2:200389233                 | chr2:200389233*  | 0.35         | 0.09 | 0.25        | 0.31 | 0.13 | 0.25 | 0.30 | 0.21 | 0.19 | 0.00 | 0.00 |      |
| <b>chr2:241759136-242088831</b>            | chr2:241776965                 | GAL3ST2-M4V      | 0.20         | 0.24 | 0.21        | 0.27 | 0.35 | 0.59 | 0.30 | 0.60 | 0.39 | 0.00 | 0.00 |      |
|                                            | chr2:241803460                 | GAL3ST2-A164R    | 0.60         | 0.61 | 0.60        | 0.11 | 0.24 | 0.14 | 0.11 | 0.16 | 0.15 | 1.00 | 0.00 |      |
|                                            | chr2:241814177                 | NEU4-P30R*       | 0.49         | 0.78 | 0.63        | 0.01 | 0.37 | 0.00 | 0.00 | 0.00 | 0.49 | 0.50 | 0.00 |      |
|                                            | chr2:241816494                 | NEU4-G301S       | 0.33         | 0.22 | 0.24        | 0.37 | 0.09 | 0.08 | 0.22 | 0.35 | 0.09 | 0.00 | 0.00 |      |
|                                            | chr2:241816965                 | NEU4-R458V       | 0.03         | 0.09 | 0.10        | 0.00 | 0.00 | 0.00 | 0.00 | 0.00 | 0.00 | 0.00 | 0.00 |      |
|                                            | chr2:241851281                 | PDCD1-A215T      | 0.51         | 0.73 | 0.56        | 0.01 | 0.38 | 0.00 | 0.02 | 0.01 | 0.50 | 1.00 | 0.00 |      |
| <b>chr4:82750503-83146792</b>              | chr4:82916988                  | THAP9-I259F      | 0.00         | 0.06 | 0.01        | 0.00 | 0.00 | 0.00 | 0.00 | 0.00 | 0.00 | 0.00 | 0.00 |      |
|                                            | chr4:82917109                  | THAP9-L299T      | 0.65         | 0.84 | 0.71        | 0.59 | 0.17 | 0.04 | 0.52 | 0.06 | 0.23 | 0.00 | 0.00 |      |
| <b>chr12:120353731-120666335</b>           | chr12:120516687                | COQ5-A152K       | 0.28         | 0.07 | 0.10        | 0.11 | 0.09 | 0.27 | 0.09 | 0.28 | 0.08 | 0.00 | 0.00 |      |
|                                            | chr12:120655947                | CABP1-A46G*      | 0.01         | 0.07 | 0.02        | 0.00 | 0.00 | 0.00 | 0.00 | 0.00 | 0.00 | 0.00 | 0.00 |      |
| <b>chr14:77312867-77558267</b>             | chr14:77326864                 | GSTZ1-E32T       | 0.90         | 0.83 | 0.73        | 0.34 | 0.47 | 0.31 | 0.29 | 0.34 | 0.51 | 1.00 | 0.00 |      |
|                                            | chr14:77327940                 | GSTZ1-M82P       | 0.07         | 0.11 | 0.03        | 0.23 | 0.05 | 0.08 | 0.20 | 0.07 | 0.04 | 0.00 | 0.00 |      |
|                                            | chr14:77377020                 | TMED8-S12P       | 0.41         | 0.12 | 0.12        | 0.20 | 0.03 | 0.09 | 0.21 | 0.05 | 0.02 | 0.00 | 0.00 |      |
|                                            | chr14:77377471                 | SAMD15-L18I      | 0.61         | 0.88 | 0.86        | 0.52 | 0.88 | 0.08 | 0.49 | 0.09 | 0.94 | 0.00 | 0.00 |      |
|                                            | chr14:77377922                 | SAMD15-M168E     | 0.41         | 0.11 | 0.12        | 0.20 | 0.03 | 0.05 | 0.21 | 0.03 | 0.02 | 0.00 | 0.00 |      |
|                                            | chr14:77378526                 | SAMD15-K370E     | 0.60         | 0.89 | 0.86        | 0.52 | 0.88 | 0.05 | 0.49 | 0.07 | 0.94 | 0.00 | 0.00 |      |
|                                            | chr14:77378778                 | SAMD15-K454N     | 0.60         | 0.89 | 0.86        | 0.52 | 0.88 | 0.08 | 0.49 | 0.09 | 0.94 | 0.00 | 0.00 |      |
|                                            | chr14:77476074                 | ISM2-D413T       | 0.06         | 0.05 | 0.04        | 0.00 | 0.00 | 0.00 | 0.00 | 0.00 | 0.00 | 0.00 | 0.00 |      |
|                                            | chr14:77484781                 | ISM2-A94V        | 1.00         | 0.98 | 0.97        | 0.65 | 0.94 | 0.14 | 0.60 | 0.12 | 0.97 | 0.00 | 0.00 |      |
|                                            | chr14:77521615                 | SPTLC2-G33V*     | 0.47         | 0.21 | 0.21        | 0.28 | 0.11 | 0.52 | 0.25 | 0.35 | 0.09 | 0.00 | 0.00 |      |
|                                            | <b>chr19:11708670-12108034</b> | chr19:11722794   | ZNF823-A247F | 0.12 | 0.06        | 0.04 | 0.00 | 0.00 | 0.00 | 0.00 | 0.00 | 0.00 | 0.00 | 0.00 |
|                                            |                                | chr19:11978549   | ZNF763-V209H | 0.51 | 0.86        | 0.83 | 0.99 | 1.00 | 0.97 | 0.98 | 0.96 | 0.99 | 0.00 | 0.00 |
|                                            |                                | chr19:11978894   | ZNF763-Y324M | 0.49 | 0.86        | 0.83 | 0.99 | 1.00 | 0.97 | 0.98 | 0.96 | 0.99 | 0.00 | 0.00 |
|                                            |                                | chr19:11978928   | ZNF763-T335G | 0.51 | 0.14        | 0.17 | 0.01 | 0.00 | 0.03 | 0.02 | 0.04 | 0.01 | 1.00 | 1.00 |
| chr19:11978990                             |                                | ZNF763-R356A     | 0.50         | 0.14 | 0.17        | 0.01 | 0.00 | 0.03 | 0.02 | 0.04 | 0.01 | 1.00 | 1.00 |      |
| chr19:12075333                             |                                | ZNF844-L51S*     | 0.19         | 0.45 | 0.46        | 0.89 | 0.91 | 0.28 | 0.83 | 0.26 | 0.95 | 0.00 | 0.00 |      |
| chr19:12075946                             |                                | ZNF844-T276P     | 0.82         | 0.53 | 0.54        | 0.11 | 0.09 | 0.76 | 0.17 | 0.78 | 0.05 | 1.00 | 1.00 |      |
| chr19:12076042                             |                                | ZNF844-A308W     | 0.18         | 0.46 | 0.46        | 0.89 | 0.91 | 0.24 | 0.83 | 0.22 | 0.95 | 0.00 | 0.00 |      |
| chr19:54231743                             | RPS9-G75R*                     | 0.39             | 0.05         | 0.09 | 0.19        | 0.07 | 0.14 | 0.18 | 0.15 | 0.09 | 0.00 | NA   |      |      |
| <b>chr19:54176104-54330609</b>             | chr19:54278849                 | LILRB2-C306      | 0.42         | 0.66 | 0.55        | 0.43 | 0.75 | 0.69 | 0.36 | 0.69 | 0.94 | 0.00 | NA   |      |

\*missense name is non-canonical



Table S20: Introgressed haplotypes with the highest frequency in regions under selection in PNG highlanders

| Candidate regions for selection  | introgressed haplotype    | PNG population | introgressed haplotype origin | introgressed haplotype frequency | introgressed haplotype count | r <sup>2</sup> |
|----------------------------------|---------------------------|----------------|-------------------------------|----------------------------------|------------------------------|----------------|
| <b>chr1:95529290-95736826</b>    | chr1:95581715-95682887*   | LL             | Denisovan                     | 0.115                            | 17                           | 0.083          |
| <b>chr2:151012094-151201575</b>  | chr2:151077551-151194524  | HL<br>LL       | Neanderthal<br>Neanderthal    | 0.009<br>0.047                   | 1<br>7                       | <b>0.574</b>   |
| <b>chr3:13010340-13217789</b>    | chr3:13132090-13174330    | HL<br>LL       | Denisovan<br>Denisovan        | 0.333<br>0.142                   | 36<br>21                     | 0.043          |
| <b>chr3:61779523-62009858</b>    | chr3:61798966-61853037    | HL<br>LL       | Neanderthal<br>Neanderthal    | 0.019<br>0.020                   | 2<br>3                       | 0.031          |
| <b>chr4:110182324-110384099</b>  | chr4:110232325-110334098  | HL<br>LL       | Neanderthal<br>Neanderthal    | 0.444<br>0.155                   | 48<br>23                     | 0.262          |
| <b>chr6:30916070-31153184</b>    | chr6:31077777-31112941    | HL<br>LL       | ambiguous<br>ambiguous        | 0.083<br>0.196                   | 9<br>29                      | 0.096          |
| <b>chr6:33006055-33132312</b>    | chr6:33092117-33115426*   | LL             | ambiguous                     | 0.007                            | 1                            | nan            |
| <b>chr7:147590904-147718219</b>  | chr7:147665094-147696027  | HL             | Denisovan                     | 0.019                            | 2                            | 0.027          |
| <b>chr10:131112245-131235951</b> | chr10:131130857-131157433 | HL             | Denisovan                     | 0.046                            | 5                            | 0.036          |
| <b>chr12:6452552-6662260</b>     | chr12:6503185-6641651*    | LL             | Denisovan                     | 0.020                            | 3                            | nan            |
| <b>chr12:9886812-10055333</b>    | chr12:9904201-10023903    | HL<br>LL       | Denisovan<br>Denisovan        | 0.046<br>0.068                   | 5<br>10                      | 0.149          |
| <b>chr12:58391529-58634980</b>   | chr12:58451248-58568114   | HL<br>LL       | ambiguous<br>ambiguous        | 0.620<br>0.405                   | 67<br>60                     | <b>0.540</b>   |
| <b>chr12:103783315-104121479</b> | chr12:103839272-104061448 | HL<br>LL       | Denisovan<br>Denisovan        | 0.556<br>0.196                   | 60<br>29                     | 0.297          |
| <b>chr13:104734734-104875020</b> | chr13:104787393-104824094 | HL<br>LL       | Denisovan<br>Denisovan        | 0.528<br>0.243                   | 57<br>36                     | 0.034          |
| <b>chr14:60157772-60377317</b>   | chr14:60220195-60315071*  | LL             | Denisovan                     | 0.074                            | 11                           | 0.080          |
| <b>chr14:92230479-92401520</b>   | chr14:92370144-92392663   | HL<br>LL       | ambiguous<br>ambiguous        | 0.028<br>0.074                   | 3<br>11                      | 0.018          |
| <b>chr18:4072997-4251153</b>     | chr18:4136427-4203633     | HL<br>LL       | Denisovan<br>Denisovan        | 0.583<br>0.385                   | 63<br>57                     | <b>1</b>       |

r<sup>2</sup> was computed on phased haplotypes from PNG highlanders for the candidate SNP and archaic SNP from the introgressed haplotype of the regions.

In some cases, introgressed haplotypes were only found in PNG lowlanders but not in PNG highlanders and none aSNP were found in PNG highlanders.

In those cases, R<sup>2</sup> could not be computed for PNG lowlanders and are indicated as nan

Candidate SNP in high LD (r<sup>2</sup>>0.5) with at least one archaic SNP of the introgressed haplotype are in bold

\*none introgressed haplotype was found in PNG highlanders in this region so we reported the introgressed haplotype with the highest frequency in PNG lowlanders

Table S21: Introgressed haplotypes with the highest frequency in regions under selection in PNG lowlanders

| Candidate regions for selection  | introgressed haplotype    | PNG population | introgressed haplotype origin | introgressed haplotype frequency | introgressed haplotype count | $r^2$        |
|----------------------------------|---------------------------|----------------|-------------------------------|----------------------------------|------------------------------|--------------|
| <b>chr1:88800562-89326878</b>    | chr1:89054418-89202534    | HL             | ambiguous                     | 0.574                            | 62                           | <b>0.943</b> |
|                                  |                           | LL             | ambiguous                     | 0.872                            | 129                          |              |
| <b>chr2:241759136-242088831</b>  | chr2:241811883-241869518  | HL             | Neanderthal                   | 0.546                            | 59                           | 0.092        |
|                                  |                           | LL             | Neanderthal                   | 0.804                            | 119                          |              |
| <b>chr4:82750503-83146792</b>    | chr4:82755644-83083169    | HL             | Denisovan                     | 0.130                            | 14                           | 0.173        |
|                                  |                           | LL             | Denisovan                     | 0.081                            | 12                           |              |
| <b>chr6:85266477-85483888</b>    | chr6:85340299-85364688    | LL             | Denisovan                     | 0.007                            | 1                            | 0.001        |
| <b>chr7:129548370-129836070</b>  | chr7:129553314-129774681  | HL             | Denisovan                     | 0.028                            | 3                            | 0.000        |
|                                  |                           | LL             | Denisovan                     | 0.041                            | 6                            |              |
| <b>chr8:133791891-133962825</b>  | chr8:133841743-133891832* | HL             | Denisovan                     | 0.019                            | 2                            | 0.000        |
| <b>chr9:93717217-93877803</b>    | chr9:93752325-93867864    | HL             | Neanderthal                   | 0.065                            | 7                            | 0.052        |
|                                  |                           | LL             | Neanderthal                   | 0.101                            | 15                           |              |
| <b>chr12:120353731-120666335</b> | chr12:120368947-120395906 | HL             | ambiguous                     | 0.083                            | 9                            | 0.008        |
|                                  |                           | LL             | ambiguous                     | 0.081                            | 12                           |              |
| <b>chr17:54003406-54222843</b>   | chr17:54036011-54160414   | HL             | Denisovan                     | 0.046                            | 5                            | 0.029        |
|                                  |                           | LL             | Denisovan                     | 0.007                            | 1                            |              |
| <b>chr19:11708670-12108034</b>   | chr19:11887941-12085466   | HL             | Neanderthal                   | 0.269                            | 29                           | 0.022        |
|                                  |                           | LL             | Neanderthal                   | 0.095                            | 14                           |              |

$r^2$  was computed on phased haplotypes from PNG lowlanders for the candidate SNP and archaic SNP from the introgressed haplotype of the regions.

Candidate SNP in high LD ( $r^2 > 0.5$ ) with at least one archaic SNP of the introgressed haplotype are in bold

\*none introgressed haplotype was found in PNG lowlanders in this region so we reported the introgressed haplotype with the highest frequency in PNG highlanders

**Table S22: pairwise comparison of the distance between archaics for the introgressed haplotype chr1:89054418-89202534 at the GBP locus**

| <b>arch_1</b>       | <b>arch_2</b>           | <b>Absolute distance difference</b> | <b>nSNP</b> | <b>difference ratio</b> |
|---------------------|-------------------------|-------------------------------------|-------------|-------------------------|
| Denisovan           | Altai Neanderthal       | 27                                  | 201         | 0.067164179             |
| Denisovan           | Vindija Neanderthal     | 168                                 | 201         | 0.417910448             |
| Denisovan           | Chagyrskaya Neanderthal | 314                                 | 201         | 0.781094527             |
| Altai Neanderthal   | Vindija Neanderthal     | 155                                 | 201         | 0.385572139             |
| Altai Neanderthal   | Chagyrskaya Neanderthal | 303                                 | 201         | 0.753731343             |
| Vindija Neanderthal | Chagyrskaya Neanderthal | 154                                 | 201         | 0.383084577             |

The distance difference is the sum of the number of alleles (0,1 or 2) by which two archaics differ at each SNP included in the pairwise comparison  
nSNP = the number of SNPs taken into the analysis; the analysis is constrained to SNPs that are called across all 4 archaics  
ratio difference = absolute difference/2\*nSNP

## Supplementary Notes

### 1. Sampling and sequencing

#### a. Sampling (with phenotypes)

For this paper, we sequenced 204 PNG individuals. These individuals were sequenced from saliva samples collected in three places in Papua New Guinea (PNG) between 2016 and 2019 (Supplementary Data 1-2). DNA was extracted from saliva samples with the Oragene sampling kit (DNA Genotek Inc., Ottawa, Canada) according to the manufacturer's instructions. Sequencing libraries were prepared using the TruSeq DNA PCR-Free HT kit (Illumina, Inc., San Diego, California, USA). About 150-bp paired-end sequencing was performed on the Illumina HiSeq X5 sequencer (Illumina, Inc., San Diego, California, USA). We also added 58 previously published PNG whole genome sequences (Brucato et al., 2021). These samples (n=262) are distributed between three sampling places, as shown below:

- **PNG highlanders** (N=60): sampled in three different PNG highlands villages located on the slope of Mount Wilhelm (Chimbu Province): Womatne (2,300 m a.s.l.), Gembogl (2,500 m a.s.l.) and Keglsugl (2,700 m a.s.l.). (EGAD00001010143, EGAD00001010142)
- **PNG lowlanders** (N=80): living below 100 m a.s.l. in Daru (Western Province) (EGAD00001010143, EGAD00001010142, EGAD500000000050).
- **PNG diversity I** dataset (N=122): individuals sampled in Port Moresby originating from various parts of PNG (EGAD00001010142, (Brucato et al., 2021).

#### b. Kept Sequences

We detected six related pairs (Supplementary Note 5). When one individual of the related pair had a different number of phenotype measurements, we kept the individual with the highest number of phenotype measurements. Otherwise, we kept the individual with the highest mean coverage (Supplementary Note 4). We removed four mislabelled sequences from Mt Wilhelm. One sequence from Daru was removed before the variant calling because of bad metrics (Supplementary Note 4). Finally, we removed two individuals with a low call rate (Supplementary Note 4).

#### c. Additional datasets (without phenotypes)

To these 262 PNG genomes, we added 81 published Papuan genomes (PNG diversity II) (Bergström et al., 2020; Jacobs et al., 2019; Malaspinas et al., 2016; Mallick et al., 2016; Vernot et al., 2016) and genomes from Yoruba in Ibadan, Nigeria (YRI, n=108), Esan in Nigeria (ESN, n=99), British in England and Scotland (GBR, n=91), Utah Residents with Northern and Western European ancestry (n=99), Han Chinese in Beijing (CHB=103), China Kinh in Ho Chi Minh City, Vietnam (KHV, n=99) (Byrska-Bishop et al., 2022). To better describe the genetic structure of the studied populations from PNG, we also added the Australian genomes of the SGDP project (n=2) (Mallick et al., 2016), genomes from Flores island from the East Island South-East Asia (East ISEA) (n=46) (Jacobs et al., 2019) and finally samples from the Mentawai and Nias Islands, in the West ISEA (n=25) (Jacobs et al., 2019).

## 2. Phenotype data collection

We chose the anthropometric and physiologic measurements based on reported adaptive mechanisms in highland populations (Beall 2013; Bigham and Lee, 2014). We explained the measurements to the study participants in detail. During the collection of the phenotypes, the participants were in the rested state, without shoes. We published these phenotype measurements as a part of our dataset (André et al., 2021). We had at least one phenotype measurement and age at the measurements for 234 of the 249 kept sequenced individuals (Table S1). We didn't have phenotype measurements for ten sequenced individuals (PNG lowlanders = 2, Port Moresby = 6, PNG highlanders = 2) and no age information for five individuals from Port Moresby. We didn't include these individuals in the association analysis (Supplementary Note 13).

## 3. Variant Calling

Sequencing data for all samples used in this study were processed together, starting from the raw reads. FASTQ files were trimmed with fastp v0.23.2 (Chen et al., 2018) using the default options, except for reads shorter than 35bp were discarded (-l 35), and auto-detection of adapters for paired-end sequence data was enabled (--detect\_adapter\_for\_pe). Unpaired reads were removed. Filtered FASTQ files were converted to BAM using Picard Tools FastqToSam v2.26.2 (*broadinstitute/picard*, 2014/2022). Further processing was performed with Broad Institute's GATK v4.2.0.0 Germline short variant discovery (SNPs and Indels) Best Practices (Poplin et al.,

2018). HaplotypeCaller tool was used to produce individual sample GVCF files using Whole Genome Germline Single Sample v2.3.2 Cromwell workflow. The JointGenotyping workflow v1.5.1 was used to produce multi-sample VCF from GVCF files obtained in the first step. Data were processed with GRCh38 genome reference built into the GATK Germline short variant discovery (SNPs + Indels) workflow <https://gatk.broadinstitute.org/hc/en-us/articles/360035535932-Germline-short-variant-discovery-SNPs-Indels>.

#### 4. Quality control

One sample from PNG lowlands (O517\_DA\_C001KMQ) was not included in the variant calling because the fraction of bases that attained at least 1X sequence coverage in post-filtering bases (PCT\_1X) was only 19%. We computed mean coverage for the new sequences from PNG using the CollectWgsMetrics tool from Picardtools v2.26.3 within the autosomes interval (Supplementary Data 2, Figure S1). The average mean coverage for all the PNG samples was 18.49x.

We computed the heterozygosity and call rate of every sequence using plink (v1.9) missing and het options. One PNG highlander (O517\_DA\_C001KNS) sequence and one PNG lowlander (191121\_FD09254770) sequence were outliers for the call rate, with a call rate lower than 92%. We removed these two individuals from further analysis (Figure S2). We computed additional quality metrics with bcftools stat for all the SNPs of all the individuals included in this paper (Supplementary Data 3).

#### 5. Kinship analysis

We used KING v2.2.4 integrated relationship inference (Manichaikul et al., 2010) to detect pairs of first and second-degree relatives among our dataset using the option `--related --degree 2`. Within the 262 sequenced individuals, we detected six pairs of related individuals: 4 pairs of second-degree relatives (PNG highlanders = 1, PNG lowlanders = 3), one PNG lowlander parent-offspring pair and one full sibling pair from PNG diversity set I.

We kept the individual with the highest mean coverage from each pair (Supplementary Note 4). When two individuals from PNG diversity set I, Daru or Mt Wilhelm, shared kinship but had a different number of phenotype measurements, we kept the individuals with the highest number of phenotype measurements (Supplementary Data 1).

## 6. Generation of genomic mask

Previous publications (Stern et al., 2019) used the 1000 Genomes Project genomic mask to indicate the sites with low accessibility to next-generation sequencing methods using short reads (Byrska-Bishop et al., 2022). Because the 1000 Genomes Project genomic masks are based on low coverage, and our dataset is based on higher coverage (both for high coverage 1000 Genomes Project data and our PNG data set), we computed a more adapted genomic mask.

Using cram files for the unrelated PNG highlanders, PNG lowlanders, PNG diversity set I individuals and 1000 Genomes Project populations of our dataset, we called the sites with a minimum base quality of 20, an alignment minimum mapping quality of 20 and downgrading mapping quality for reads containing excessive mismatches with a coefficient of 50. From these sites, we excluded indels, sites with more than two alleles, sites with a maximum missing rate of 5% and sites that weren't included in the mappability mask from MSMC (liftover to GR38) (Schiffels & Durbin, 2014). We also masked sites whose depth of coverage summed across all samples was higher or lower than the sum of the average depth across the dataset (24184.7) by a factor of 2-fold (below 12092.35 or above 48369.4). We wrote the remaining sites P (the base passed all filters), except for variants without the PASS flag from the variant calling.

## 7. LD pruning and Admixture

To prune variants in high linkage disequilibrium, we used PLINK v.1.9 using the default parameters of 50 variants count window shifting from five variants and a variance inflation factor (VIF) threshold of 2 (Purcell et al., 2007). We ran ADMIXTURE v1.3 (Alexander et al., 2009) for the components K=2 to K=10 on the same dataset as the PCA. ADMIXTURE computes the cross-validation error for each component using a k-fold cross-validation procedure. We set the k parameter to 100. To assess the fit of each model generated, we generated the cross-validation error ten times for each component. We then defined the confidence interval of the cross-validation error for the component using the quantile of the ten generated cross-validation errors. The confidence interval of the cross-validation error will be indicated as the following: (CI, 0.025 and 0.975 quantiles) for each component (Figure S4). We

used `pong 1.5` (Behr et al., 2016) to generate the ADMIXTURE ancestry proportions plots.

## 8. Phasing

We phased sequences from Daru, Mt Wilhelm, PNG diversity set I and African, European and Asian populations from the 1000 Genomes Project dataset. We used the software `shapeit4` (v4.2.2) (Delaneau et al., 2019). Because a reference appropriated to Papuans doesn't exist, we phased the samples statistically without reference. We used the genetic map provided by Eagle (Loh et al., 2016). This phasing was performed per chromosome using the sequencing option that adjusts the default parameters for sequenced data. In order to evaluate the phasing error, we computed the percentage of switches for individuals of the 1000 Genomes Project in our phased dataset that have phasing for trio available (CEU,  $n=1$ ; YRI,  $n=2$ , KHV,  $n=2$ ) (The 1000 Genomes Project Consortium et al., 2015). The average switch percentage in our phased dataset for these five individuals is 1.41%, which falls in the switch error range observed for the phased data published with the 1000 Genomes Project for which the majority of SNPs, which fall in the  $MAF > 5\%$  category, have an error  $< 2.5\%$  (Belsare et al., 2019).

## 9. Random sampling approach to test the significance of the top candidate regions for selection

We used a random sampling approach (Skoglund et al., 2017) to test the significance of the top 10 windows with the highest score for each of the three selection scores. We looked at whether the score of the unit used to determine the score of the genomic region – SNP for XP-EHH or 20-SNP windows for PBS and Fisher score – with the highest score in the region was significantly higher than the score of random units along the genome. For each selection test, we defined random units along all the autosomes so that they are separated by at least 5Mb and thus remain independent. For XP-EHH, we compared the score of the top SNP in each candidate region to the distribution of the XP-EHH score of individual random SNPs. For the PBS and Fisher scores, the random distribution was built using random sliding windows of 20 SNPs defined in the PBS approach. In order for the random distribution to be approximately normal, we transformed the PBS and Fisher scores with the  $\log_{10}$  transformation method. We compared the score (or the  $\log_{10}$  of the score) of the sliding windows with the highest score (or its  $\log_{10}$ ) for each of the top



10 candidate regions to the distribution of the PBS or Fisher score of the random sliding windows (Figure S5). Finally, we computed a Z score for each candidate region ( $Z(x)$ ) using the mean ( $\mu$ ) and standard deviation for the score of the random regions ( $\sigma$ ) and the score of the candidate region ( $fx$ ).  $Z(x) = (fx - \mu)/\sigma$  (Figure S6 and S7).

#### 10. Control for the difference in mean coverage

Due to the uneven distribution of mean depth of coverage in our sample interval (Supplementary Data 2, Figure S1), we decided to check for the impact of including individuals with such higher mean coverage. We performed the XP-EHH and PBS selection scans on PNG highlanders and lowlanders while we have reduced the coverage for the 15 outliers (which are all PNG lowlanders) with a mean of coverage >25 to 30% of their previous coverage (which roughly makes all the samples with very similar coverages). In order to limit the influence of any other parameters, we performed four new independent variant callings, two of which were used for the XP-EHH scans and two of which were used for the PBS scans. For XP-EHH, the first variant calling includes all the PNG highlanders and PNG lowlanders used in the initial XP-EHH selection scan. The second variant calling includes the same individuals with the 15 outlier lowlanders whose mean coverage has been reduced. We then followed the same phasing and XP-EHH selection protocol described in the manuscript. We see a huge correlation between the two XP-EHH scores (Spearman coeff=0.965) (Figure S8). Moreover, we plot the SNPs in the 1<sup>st</sup> percentile in the first XP-EHH scan (including high coverage lowlanders) and the SNPs in the 1<sup>st</sup> percentile in the second XP-EHH scan (with 15 outliers lowlanders with reduced coverage). Most of our candidate regions for selection in PNG lowlanders include SNP in the 1<sup>st</sup> percentile in the two XP-EHH scans. In order to test the impact of higher coverage individual on the PBS scan, we performed two similar variant calling – with the 15 outliers with their initial mean of coverage or reduced coverage — including this time the YRI from I000 Genomes that we use as an outgroup. We also observe a very strong correlation between PBS scores when using the high-coverage lowlanders or the reduced-coverage lowlanders (Spearman coeff=0.998) (Figure S9). Overall, these additional analyses support the idea that the PNG lowlanders with higher coverage have a limited impact on our selection scan results.

## 11. Control for admixture in PNG lowlanders

We ran admixture for  $K=8$  using the same dataset as described in Supplementary Note 6, using the bootstrapping procedure included in the admixture software, using the default number replicate of 200. This allowed us to estimate the parameter standard errors. We observed that the average admixture from PNG highlanders to PNG lowlanders is 3.28% (SE=1.86%). In order to determine whether this admixture level might affect our selection scores results, we computed the XP-EHH and PBS scores while excluding the 21 PNG lowlander individuals that had an admixture level from PNG highlanders above 5%, and we observed that there is a strong correlation (spearman coefficient  $> 0.92$ ) between these new results and the original ones performed (Supplementary Figs. 10 and 11).

## 12. Relate

We computed recombination trees for the phased dataset using RELATE v1.1.8 (Speidel et al., 2019). We generated Relate input files from the phased dataset following Relate manual instructions using a genomic mask we generated ourselves (Supplementary Note 6) and the ancestral genome from the Ensembl 93 release (Zerbino et al., 2018). With these inputs, we generated local trees using the default parameters for the mutation rate ( $1.25e-8$  per generation per base pair), the effective population size (30000) and Eagle genetic map (Loh et al., 2016). We then extracted subtrees of PNG highlanders and PNG lowlanders subtrees from the generated local trees.

Using the population-specific relative subtrees, we computed the coalescence rates through time separately for PNG highlanders and PNG lowlanders. We specified the first-time interval starting from 0 to  $10^2$  years ago, and then the period between  $10^2$  and  $10^7$  is split into successive bins with a step of  $10^{0.1}$ . We used Relate default parameters of 28 years per generation, the number of cycles and the fractions of trees to be dropped.

Finally, we extracted the local trees for each SNP in the regions of interest separately for PNG highlanders and PNG lowlanders and sampled branch lengths for those trees using an MCMC-like approach by applying the relevant Relate script. The branch length of the focal SNP tree is resampled 200 times (“—num\_samples 200”

option of the “SampleBranchLengths.sh” script ), and each iteration result is recorded to estimate the uncertainty in the age estimate of each node.

To take the uncertainty in the branch length estimate into account, we performed this step 5 times. For each SNP of each region of interest, we computed sampled branches five times. We will run Clues for each of the five sampled branches.

In order to support the idea that our Relate set-up is appropriate, we added the Ne curves for CEU, CHB, and CEU generated with our Relate set-up (Figure S12). They are similar to the Ne curves generated in the original Relate paper (Speidel, Forest, Shi, & Myers, 2019). None such curves were available for the Papuan population or population with similar demographic history, but the Ne curves we generated for PNG highlanders and lowlanders are similar to the Ne curves generated with MSMC2 (Schiffels & Wang, 2020) by Brucato et al. (Brucato et al., 2021) on other PNG individuals.

### 13. Clues

We used the CLUES (Stern et al., 2019), an approximate full-likelihood method for inferring selection, on each of the regions of interest previously characterized with XP-EHH, PBS and Fisher Scores. This is to detect the SNP, which is the most likely to drive selection in each region.

CLUES uses the local trees generated for each SNP with RELATE (Supplementary Note 11) in the regions of interest. The CLUES method will give each SNP the ratio of the likelihood of the SNPs being under selection – with a coefficient of selection computed by Clues – versus the likelihood of the SNP being under a neutral model. We computed the likelihood ratio for the five branch lengths generated for each SNP and averaged the five likelihood ratios. Finally, for each region, we selected the top five SNPs with the highest average likelihood ratios and generated branch lengths and logLR 50 additional times for these SNPs to further fine map for the causal SNP (Tables S9-S12). Because SNPs with low DAF are unlikely to be under positive selection, we didn’t consider SNPs with DAF lower than 5%.

In order to control if our set-up is able to pinpoint the candidate SNP under selection for already known adaptation scenarios, we generated five independent runs for every SNP within the MCM6/LCT locus (chr2: 135820191- 135876443). We reproduce the results from the original Clues paper (Stern et al., 2019) by showing

that the SNP with the highest logLR average is for rs4988235 – (chr2:135850976) (average logLR)= 22.7596, average  $s$ = 0.00718), a SNP of the MCM6 gene regulating the LCT and associated to the lactase persistence phenotype in Europeans (Smith et al., 2009).

#### 14. Association in the UK Biobank

When looking for phenotypes significantly associated with the candidate SNPs in the UK Biobank, we considered the 1900 phenotypes for which the sampling size was higher than 10,000 and for which the p-value was computed within the European population (pval\_EUR). We excluded from those the phenotypes related to diet (categories 100090 and 100052), sociodemographic factors (category 100062), sexual factors (category 100056), social support (category 100061), electronic use (category 100053) and the local environment (category 114) because of the absence of correspondence between the environmental variable described within these categories and the environment to which the studied PNG populations are exposed.

#### 15. Association test with PNG phenotypes

We used Genome-wide Efficient Mixed Model Association GEMMA (v0.98.4) (Zhou & Stephens, 2012) to detect if the SNPs likely to be under selection in PNG highlanders or PNG lowlanders are associated with any of the phenotypes we measured in the PNG population. We first created a centred relatedness matrix for all the unrelated PNG individuals for which we had at least one phenotype measurement ( $n=234$ ) (Table S2). To correct for population structure, we performed GEMMA univariate Linear Mixed Model (LMM), including this relatedness matrix. As we did in our previous study (André et al., 2021), we corrected height, diastolic pressure, systolic pressure, heart rate and haemoglobin for age and gender using a multiple linear regression approach. As height can be a covariable to some of these phenotypes, we also regressed chest width, waist circumference, FEV1, PEF and FVC, correcting for age, gender and height. For each phenotype, we performed the GEMMA LMM for the SNPs of interest and the phenotype residuals with the relatedness matrix to control for population structure. Because we are performing the test for several SNPs, we corrected for multi-testing with the Benjamini-Hochberg procedure (Benjamini & Hochberg, 1995) for  $FDR < 5\%$ . We corrected the p-value following the equation from (Yekutieli & Benjamini, 1999). For each phenotype, we multiply each p-value (one per SNP tested for the phenotype) per the total number of SNPs tested for the phenotype

and divide it by the p-value rank order (smallest p-value for the phenotype = 1). We are also testing multiple phenotypes that gather in five groups of phenotypes highly correlated to each other (André et al., 2021) because the adjusted p-value should be considered significant when lower than 0.01 (0.05/5).

## 16. Introgression

When the candidate SNP for the region under selection was in LD ( $r^2 > 0.5$ ) with at least one of the archaic SNPs of the introgressed haplotype, we built median-joining haplotype networks using Popart ver. 1.7 (Leigh & Bryant, 2015). In detail, starting from the phased vcf, we generated the nexus input files required by Popart using a custom script, first transforming the vcf in fasta, harnessing the scikit.allel python module, and considering 5kbp down- and upstream the variant of interest. Next, we built the median-joining network with default settings (epsilon=0) (Figure S15-S18).

In addition, to explore further adaptive introgression for specific introgressed haplotypes, we used haplostrips v1.3 (Marnetto & Huerta-Sánchez, 2017) within PNG, African, Asian and European samples with Altai (Prüfer et al., 2014), Vindija (Prüfer et al., 2017), Chagyrskaya (Mafessoni et al., 2020) Neanderthal or Denisovan (Meyer et al., 2012) genome as reference haplotypes (Figure S15). We first subset Neanderthal and Denisovan positions for the positions in our PNG and 1000 Genomes Project dataset with bcftools view v.1.14 (Danecek et al., 2021).

We ran haplostrips for the GBP locus under selection in PNG lowlanders using the phased dataset and the extracted Denisovan or Neanderthal positions. We used the haplostrips inner join option, where only sites present in the PNG, the 1000 Genomes Project dataset, and the archaic positions were used.

## References:

- Alexander, D. H., Novembre, J., & Lange, K. (2009). Fast model-based estimation of ancestry in unrelated individuals. *Genome Research*, 19(9), 1655-1664.  
<https://doi.org/10.1101/gr.094052.109>
- André, M., Brucato, N., Plutniak, S., Kariwiga, J., Muke, J., Morez, A., Leavesley, M., Mondal, M., & Ricaut, F.-X. (2021). Phenotypic differences between highlanders and lowlanders in Papua New Guinea. *PLOS ONE*, 16(7), e0253921. <https://doi.org/10.1371/journal.pone.0253921>
- André, M., Brucato, N., Hudjasov, G., Pankratov, V., Yermakovich, D., Kreevan, R., ... Ricaut, F.-X. (2022, décembre 15). Positive selection in the genomes of two Papua New Guinean populations at distinct altitude levels, Source data, <https://doi.org/10.6084/m9.figshare.23695062>, 2024
- André, M., Brucato, N., Hudjasov, G., Pankratov, V., Yermakovich, D., Kreevan, R., ... Ricaut, F.-X. (2022, décembre 15). Positive selection in the genomes of two Papua New Guinean populations at distinct altitude levels, <https://github.com/mathilde999/selection-png>, <https://doi.org/10.5281/zenodo.10793101>, 2024
- Beall, C. M. (2013). Human adaptability studies at high altitude : Research designs and major concepts during fifty years of discovery. *American Journal of Human Biology*, 25(2), 141-147. <https://doi.org/10.1002/ajhb.22355>
- Behr, A. A., Liu, K. Z., Liu-Fang, G., Nakka, P., & Ramachandran, S. (2016). pong : Fast analysis and visualization of latent clusters in population genetic data. *Bioinformatics*, 32(18), 2817-2823.  
<https://doi.org/10.1093/bioinformatics/btw327>
- Belsare, S., Levy-Sakin, M., Mostovoy, Y., Durinck, S., Chaudhuri, S., Xiao, M., Peterson, A. S., Kwok, P.-Y., Seshagiri, S., & Wall, J. D. (2019). Evaluating

- the quality of the 1000 genomes project data. *BMC Genomics*, 20.  
<https://doi.org/10.1186/s12864-019-5957-x>
- Benjamini, Y., & Hochberg, Y. (1995). Controlling the False Discovery Rate : A Practical and Powerful Approach to Multiple Testing. *Journal of the Royal Statistical Society. Series B (Methodological)*, 57(1), 289-300.
- Bergström, A., McCarthy, S. A., Hui, R., Almarri, M. A., Ayub, Q., Danecek, P., Chen, Y., Felkel, S., Hallast, P., Kamm, J., Blanché, H., Deleuze, J.-F., Cann, H., Mallick, S., Reich, D., Sandhu, M. S., Skoglund, P., Scally, A., Xue, Y., ... Tyler-Smith, C. (2020). Insights into human genetic variation and population history from 929 diverse genomes. *Science*, 367(6484).  
<https://doi.org/10.1126/science.aay5012>
- Bigham, A. W., & Lee, F. S. (2014). Human high-altitude adaptation : Forward genetics meets the HIF pathway. *Genes & Development*, 28(20), 2189-2204.  
<https://doi.org/10.1101/gad.250167.114>
- Broadinstitute/picard*. (2022). [Java]. Broad Institute.  
<https://github.com/broadinstitute/picard> (Édition originale 2014)
- Brucato, N., André, M., Tsang, R., Saag, L., Kariwiga, J., Sesuki, K., Beni, T., Pomat, W., Muke, J., Meyer, V., Boland, A., Deleuze, J.-F., Sudoyo, H., Mondal, M., Pagani, L., Gallego Romero, I., Metspalu, M., Cox, M. P., Leavesley, M., & Ricaut, F.-X. (2021). Papua New Guinean Genomes Reveal the Complex Settlement of North Sahul. *Molecular Biology and Evolution*, msab238.  
<https://doi.org/10.1093/molbev/msab238>
- Byrska-Bishop, M., Evani, U. S., Zhao, X., Basile, A. O., Abel, H. J., Regier, A. A., Corvelo, A., Clarke, W. E., Musunuri, R., Nagulapalli, K., Fairley, S., Runnels, A., Winterkorn, L., Lowy, E., Paul Flicek, Germer, S., Brand, H., Hall, I. M.,

- Talkowski, M. E., ... Xiao, C. (2022). High-coverage whole-genome sequencing of the expanded 1000 Genomes Project cohort including 602 trios. *Cell*, 185(18), 3426-3440.e19. <https://doi.org/10.1016/j.cell.2022.08.004>
- Chen, S., Zhou, Y., Chen, Y., & Gu, J. (2018). fastp : An ultra-fast all-in-one FASTQ preprocessor. *Bioinformatics*, 34(17), i884-i890. <https://doi.org/10.1093/bioinformatics/bty560>
- Danecek, P., Bonfield, J. K., Liddle, J., Marshall, J., Ohan, V., Pollard, M. O., Whitwham, A., Keane, T., McCarthy, S. A., Davies, R. M., & Li, H. (2021). Twelve years of SAMtools and BCFtools. *GigaScience*, 10(2), giab008. <https://doi.org/10.1093/gigascience/giab008>
- Delaneau, O., Zagury, J.-F., Robinson, M. R., Marchini, J. L., & Dermitzakis, E. T. (2019). Accurate, scalable and integrative haplotype estimation. *Nature Communications*, 10(1), Article 1. <https://doi.org/10.1038/s41467-019-13225-y>
- Jacobs, G. S., Hudjashov, G., Saag, L., Kusuma, P., Darusallam, C. C., Lawson, D. J., Mondal, M., Pagani, L., Ricaut, F.-X., Stoneking, M., Metspalu, M., Sudoyo, H., Lansing, J. S., & Cox, M. P. (2019). Multiple Deeply Divergent Denisovan Ancestries in Papuans. *Cell*, 177(4), 1010-1021.e32. <https://doi.org/10.1016/j.cell.2019.02.035>
- Leigh, J. W., & Bryant, D. (2015). popart : Full-feature software for haplotype network construction. *Methods in Ecology and Evolution*, 6(9), 1110-1116. <https://doi.org/10.1111/2041-210X.12410>
- Loh, P.-R., Palamara, P. F., & Price, A. L. (2016). Fast and accurate long-range phasing in a UK Biobank cohort. *Nature Genetics*, 48(7), 811-816. <https://doi.org/10.1038/ng.3571>



- Mafessoni, F., Grote, S., de Filippo, C., Slon, V., Kolobova, K. A., Viola, B., Markin, S. V., Chintalapati, M., Peyrégne, S., Skov, L., Skoglund, P., Krivoschapkin, A. I., Derevianko, A. P., Meyer, M., Kelso, J., Peter, B., Prüfer, K., & Pääbo, S. (2020). A high-coverage Neandertal genome from Chagyrskaya Cave. *Proceedings of the National Academy of Sciences*, 117(26), 15132-15136. <https://doi.org/10.1073/pnas.2004944117>
- Malaspinas, A.-S., Westaway, M. C., Muller, C., Sousa, V. C., Lao, O., Alves, I., Bergström, A., Athanasiadis, G., Cheng, J. Y., Crawford, J. E., Heupink, T. H., Macholdt, E., Peischl, S., Rasmussen, S., Schiffels, S., Subramanian, S., Wright, J. L., Albrechtsen, A., Barbieri, C., ... Willerslev, E. (2016). A genomic history of Aboriginal Australia. *Nature*, 538(7624), 207-214. <https://doi.org/10.1038/nature18299>
- Mallick, S., Li, H., Lipson, M., Mathieson, I., Gymrek, M., Racimo, F., Zhao, M., Chennagiri, N., Nordenfelt, S., Tandon, A., Skoglund, P., Lazaridis, I., Sankararaman, S., Fu, Q., Rohland, N., Renaud, G., Erlich, Y., Willems, T., Gallo, C., ... Reich, D. (2016). The Simons Genome Diversity Project : 300 genomes from 142 diverse populations. *Nature*, 538(7624), 201-206. <https://doi.org/10.1038/nature18964>
- Manichaikul, A., Mychaleckyj, J. C., Rich, S. S., Daly, K., Sale, M., & Chen, W.-M. (2010). Robust relationship inference in genome-wide association studies. *Bioinformatics*, 26(22), 2867-2873. <https://doi.org/10.1093/bioinformatics/btq559>
- Marnetto, D., & Huerta-Sánchez, E. (2017). Haplostrips : Revealing population structure through haplotype visualization. *Methods in Ecology and Evolution*, 8(10), 1389-1392. <https://doi.org/10.1111/2041-210X.12747>

- Meyer, M., Kircher, M., Gansauge, M.-T., Li, H., Racimo, F., Mallick, S., Schraiber, J. G., Jay, F., Prüfer, K., Filippo, C. de, Sudmant, P. H., Alkan, C., Fu, Q., Do, R., Rohland, N., Tandon, A., Siebauer, M., Green, R. E., Bryc, K., ... Pääbo, S. (2012). A High-Coverage Genome Sequence from an Archaic Denisovan Individual. *Science*, 338(6104), 222-226.  
<https://doi.org/10.1126/science.1224344>
- Poplin, R., Ruano-Rubio, V., DePristo, M. A., Fennell, T. J., Carneiro, M. O., Auwera, G. A. V. der, Kling, D. E., Gauthier, L. D., Levy-Moonshine, A., Roazen, D., Shakir, K., Thibault, J., Chandran, S., Whelan, C., Lek, M., Gabriel, S., Daly, M. J., Neale, B., MacArthur, D. G., & Banks, E. (2018). *Scaling accurate genetic variant discovery to tens of thousands of samples* (p. 201178).  
bioRxiv. <https://doi.org/10.1101/201178>
- Prüfer, K., de Filippo, C., Grote, S., Mafessoni, F., Korlević, P., Hajdinjak, M., Vernot, B., Skov, L., Hsieh, P., Peyrégne, S., Reher, D., Hopfe, C., Nagel, S., Maricic, T., Fu, Q., Theunert, C., Rogers, R., Skoglund, P., Chintalapati, M., ... Pääbo, S. (2017). A high-coverage Neandertal genome from Vindija Cave in Croatia. *Science (New York, N.Y.)*, 358(6363), 655-658.  
<https://doi.org/10.1126/science.aao1887>
- Prüfer, K., Racimo, F., Patterson, N., Jay, F., Sankararaman, S., Sawyer, S., Heinze, A., Renaud, G., Sudmant, P. H., de Filippo, C., Li, H., Mallick, S., Dannemann, M., Fu, Q., Kircher, M., Kuhlwilm, M., Lachmann, M., Meyer, M., Ongyerth, M., ... Pääbo, S. (2014). The complete genome sequence of a Neandertal from the Altai Mountains. *Nature*, 505(7481), 43-49.  
<https://doi.org/10.1038/nature12886>

- Purcell, S., Neale, B., Todd-Brown, K., Thomas, L., Ferreira, M. A. R., Bender, D., Maller, J., Sklar, P., de Bakker, P. I. W., Daly, M. J., & Sham, P. C. (2007). PLINK : A Tool Set for Whole-Genome Association and Population-Based Linkage Analyses. *American Journal of Human Genetics*, *81*(3), 559-575.
- Schiffels, S., & Durbin, R. (2014). Inferring human population size and separation history from multiple genome sequences. *Nature genetics*, *46*(8), 919-925. <https://doi.org/10.1038/ng.3015>
- Skoglund, P., Thompson, J. C., Prendergast, M. E., Mitnik, A., Sirak, K., Hajdinjak, M., Salie, T., Rohland, N., Mallick, S., Peltzer, A., Heinze, A., Olalde, I., Ferry, M., Harney, E., Michel, M., Stewardson, K., Cerezo-Roman, J., Chiumia, C., Crowther, A., ... Reich, D. (2017). Reconstructing Prehistoric African Population Structure. *Cell*, *171*(1), 59-71.e21. <https://doi.org/10.1016/j.cell.2017.08.049>
- Smith, G. D., Lawlor, D. A., Timpson, N. J., Baban, J., Kiessling, M., Day, I. N. M., & Ebrahim, S. (2009). Lactase persistence-related genetic variant : Population substructure and health outcomes. *European Journal of Human Genetics*, *17*(3), Article 3. <https://doi.org/10.1038/ejhg.2008.156>
- Speidel, L., Forest, M., Shi, S., & Myers, S. R. (2019). A method for genome-wide genealogy estimation for thousands of samples. *Nature Genetics*, *51*(9), Article 9. <https://doi.org/10.1038/s41588-019-0484-x>
- Stern, A. J., Wilton, P. R., & Nielsen, R. (2019). An approximate full-likelihood method for inferring selection and allele frequency trajectories from DNA sequence data. *PLOS Genetics*, *15*(9), e1008384. <https://doi.org/10.1371/journal.pgen.1008384>

- The 1000 Genomes Project Consortium, Gibbs, R. A., Boerwinkle, E., Doddapaneni, H., Han, Y., Korchina, V., Kovar, C., Lee, S., Muzny, D., Reid, J. G., Zhu, Y., Wang, J., Chang, Y., Feng, Q., Fang, X., Guo, X., Jian, M., Jiang, H., Jin, X., ... Rasheed, A. (2015). A global reference for human genetic variation. *Nature*, *526*(7571), 68-74. <https://doi.org/10.1038/nature15393>
- Vernot, B., Tucci, S., Kelso, J., Schraiber, J. G., Wolf, A. B., Gittelman, R. M., Dannemann, M., Grote, S., McCoy, R. C., Norton, H., Scheinfeldt, L. B., Merriwether, D. A., Koki, G., Friedlaender, J. S., Wakefield, J., Pääbo, S., & Akey, J. M. (2016). Excavating Neandertal and Denisovan DNA from the genomes of Melanesian individuals. *Science (New York, N.Y.)*, *352*(6282), 235-239. <https://doi.org/10.1126/science.aad9416>
- Yekutieli, D., & Benjamini, Y. (1999). Resampling-based false discovery rate controlling multiple test procedures for correlated test statistics. *Journal of Statistical Planning and Inference*, *82*(1), 171-196. [https://doi.org/10.1016/S0378-3758\(99\)00041-5](https://doi.org/10.1016/S0378-3758(99)00041-5)
- Zerbino, D. R., Achuthan, P., Akanni, W., Amode, M. R., Barrell, D., Bhai, J., Billis, K., Cummins, C., Gall, A., Girón, C. G., Gil, L., Gordon, L., Haggerty, L., Haskell, E., Hourlier, T., Izuogu, O. G., Janacek, S. H., Juettemann, T., To, J. K., ... Flicek, P. (2018). Ensembl 2018. *Nucleic Acids Research*, *46*(D1), D754-D761. <https://doi.org/10.1093/nar/gkx1098>
- Zhou, X., & Stephens, M. (2012). Genome-wide efficient mixed-model analysis for association studies. *Nature Genetics*, *44*(7), Article 7. <https://doi.org/10.1038/ng.2310>
