# Supplementary material for: Positive selection in the genomes of two Papua New Guinean populations at distinct altitude levels
Source: PubMed Central journal article supplement (PMC11061283; doi:10.1038/s41467-024-47735-1), 2024-04-30
Supplement: 41467_2024_47735_MOESM3_ESM.pdf [file 41467_2024_47735_MOESM3_ESM.pdf]

### Description of Additional Supplementary Files

**Supplementary Data 1:** Papuan dataset of the study and which analysis they have been included.

**Supplementary Data 2:** Mean coverage, heterozygosity and call rate within the autosome interval for PNG diversity set I, PNG highlanders and PNG lowlanders.

**Supplementary Data 3:** Quality metrics for all the sequences included in the variant calling.

**Supplementary Data 4:** Introgressed archaic segments identified with hmmix per sample for the most frequent introgressed haplotype for the genomic region chr12:58391529-58634980 under selection in PNG highlanders.

**Supplementary Data 5:** Introgressed archaic segments identified with hmmix per sample for the most frequent introgressed haplotype for the genomic region chr1:88800562-89326878 under selection in PNG lowlanders.
